# Supplementary material for: Network Pharmacology-Based Analysis on Lonicera japonica for Chronic Osteomyelitis Treatment
Source: Hindawi journal article supplement (doi:10.1155/2022/1706716), 2022-01-24
Supplement: f1 [file 1706716.f1.zip]

Archive with 2 entries (2 files):
- 1706716.f1/Supplementary table 1 Target Symbol.pdf
- 1706716.f1/Supplementary table 2 GeneCards Search Results.pdf
