# Supplementary material for: Network Pharmacology-Based Analysis on Lonicera japonica for Chronic Osteomyelitis Treatment
Source: Hindawi journal article supplement (doi:10.1155/2022/1706716), 2022-01-24
Supplement: f1 [file 1706716.f1.zip]

| Gene Symt | Description | Category   | Gifts | GC Id    | Relevance | GeneCards Link                                                                                      |
|-----------|-------------|------------|-------|----------|-----------|-----------------------------------------------------------------------------------------------------|
| TNF       | Tumor Nec   | Protein Co | 53    | GC06P033 | 78.55     | <a href="https://www.genecards.org/cgi-bin/carddisj">https://www.genecards.org/cgi-bin/carddisj</a> |
| IL1RN     | Interleukin | Protein Co | 50    | GC02P114 | 74.66     | <a href="https://www.genecards.org/cgi-bin/carddisj">https://www.genecards.org/cgi-bin/carddisj</a> |
| IL6       | Interleukin | Protein Co | 51    | GC07P022 | 72.88     | <a href="https://www.genecards.org/cgi-bin/carddisj">https://www.genecards.org/cgi-bin/carddisj</a> |
| IL1B      | Interleukin | Protein Co | 50    | GC02M112 | 64.29     | <a href="https://www.genecards.org/cgi-bin/carddisj">https://www.genecards.org/cgi-bin/carddisj</a> |
| IL10      | Interleukin | Protein Co | 49    | GC01M206 | 59.23     | <a href="https://www.genecards.org/cgi-bin/carddisj">https://www.genecards.org/cgi-bin/carddisj</a> |
| IFNG      | Interferon  | Protein Co | 50    | GC12M068 | 54.49     | <a href="https://www.genecards.org/cgi-bin/carddisj">https://www.genecards.org/cgi-bin/carddisj</a> |
| NLRP3     | NLR Family  | Protein Co | 48    | GC01P247 | 49.32     | <a href="https://www.genecards.org/cgi-bin/carddisj">https://www.genecards.org/cgi-bin/carddisj</a> |
| CYBB      | Cytochrome  | Protein Co | 48    | GC0XP037 | 49.18     | <a href="https://www.genecards.org/cgi-bin/carddisj">https://www.genecards.org/cgi-bin/carddisj</a> |
| TERT      | Telomerase  | Protein Co | 53    | GC05M001 | 46.16     | <a href="https://www.genecards.org/cgi-bin/carddisj">https://www.genecards.org/cgi-bin/carddisj</a> |
| TNFSF11   | TNF Super   | Protein Co | 49    | GC13P042 | 45.89     | <a href="https://www.genecards.org/cgi-bin/carddisj">https://www.genecards.org/cgi-bin/carddisj</a> |
| TLR4      | Toll Like R | Protein Co | 52    | GC09P117 | 44.4      | <a href="https://www.genecards.org/cgi-bin/carddisj">https://www.genecards.org/cgi-bin/carddisj</a> |
| NCF2      | Neutrophil  | Protein Co | 48    | GC01M183 | 44.39     | <a href="https://www.genecards.org/cgi-bin/carddisj">https://www.genecards.org/cgi-bin/carddisj</a> |
| CYBA      | Cytochrome  | Protein Co | 47    | GC16M088 | 39.9      | <a href="https://www.genecards.org/cgi-bin/carddisj">https://www.genecards.org/cgi-bin/carddisj</a> |
| LPIN2     | Lipin 2     | Protein Co | 43    | GC18M002 | 39.66     | <a href="https://www.genecards.org/cgi-bin/carddisj">https://www.genecards.org/cgi-bin/carddisj</a> |
| STAT1     | Signal Tran | Protein Co | 55    | GC02M190 | 37.53     | <a href="https://www.genecards.org/cgi-bin/carddisj">https://www.genecards.org/cgi-bin/carddisj</a> |
| NCF1      | Neutrophil  | Protein Co | 49    | GC07P074 | 36.9      | <a href="https://www.genecards.org/cgi-bin/carddisj">https://www.genecards.org/cgi-bin/carddisj</a> |
| CD40LG    | CD40 Ligar  | Protein Co | 49    | GC0XP136 | 36.74     | <a href="https://www.genecards.org/cgi-bin/carddisj">https://www.genecards.org/cgi-bin/carddisj</a> |
| MPO       | Myelopero   | Protein Co | 51    | GC17M058 | 36.42     | <a href="https://www.genecards.org/cgi-bin/carddisj">https://www.genecards.org/cgi-bin/carddisj</a> |
| CRP       | C-Reactive  | Protein Co | 48    | GC01M159 | 35.58     | <a href="https://www.genecards.org/cgi-bin/carddisj">https://www.genecards.org/cgi-bin/carddisj</a> |
| STAT3     | Signal Tran | Protein Co | 54    | GC17M042 | 35.24     | <a href="https://www.genecards.org/cgi-bin/carddisj">https://www.genecards.org/cgi-bin/carddisj</a> |
| CXCL8     | C-X-C Mo    | Protein Co | 43    | GC04P073 | 34.76     | <a href="https://www.genecards.org/cgi-bin/carddisj">https://www.genecards.org/cgi-bin/carddisj</a> |
| NOD2      | Nucleotide  | Protein Co | 49    | GC16P050 | 34.17     | <a href="https://www.genecards.org/cgi-bin/carddisj">https://www.genecards.org/cgi-bin/carddisj</a> |
| SPTLC1    | Serine Palr | Protein Co | 48    | GC09M092 | 33.94     | <a href="https://www.genecards.org/cgi-bin/carddisj">https://www.genecards.org/cgi-bin/carddisj</a> |
| ADA       | Adenosine   | Protein Co | 51    | GC20M044 | 33.72     | <a href="https://www.genecards.org/cgi-bin/carddisj">https://www.genecards.org/cgi-bin/carddisj</a> |
| NCF4      | Neutrophil  | Protein Co | 50    | GC22P036 | 32.24     | <a href="https://www.genecards.org/cgi-bin/carddisj">https://www.genecards.org/cgi-bin/carddisj</a> |
| CD79A     | CD79a Mo    | Protein Co | 48    | GC19P041 | 31.36     | <a href="https://www.genecards.org/cgi-bin/carddisj">https://www.genecards.org/cgi-bin/carddisj</a> |
| IL13      | Interleukin | Protein Co | 46    | GC05P132 | 31.27     | <a href="https://www.genecards.org/cgi-bin/carddisj">https://www.genecards.org/cgi-bin/carddisj</a> |
| ACE       | Angiotensi  | Protein Co | 51    | GC17P063 | 31.24     | <a href="https://www.genecards.org/cgi-bin/carddisj">https://www.genecards.org/cgi-bin/carddisj</a> |
| MEFV      | MEFV Inna   | Protein Co | 44    | GC16M003 | 31.12     | <a href="https://www.genecards.org/cgi-bin/carddisj">https://www.genecards.org/cgi-bin/carddisj</a> |
| TGFB1     | Transformi  | Protein Co | 54    | GC19M041 | 30.7      | <a href="https://www.genecards.org/cgi-bin/carddisj">https://www.genecards.org/cgi-bin/carddisj</a> |
| ALPL      | Alkaline Ph | Protein Co | 52    | GC01P021 | 30.62     | <a href="https://www.genecards.org/cgi-bin/carddisj">https://www.genecards.org/cgi-bin/carddisj</a> |
| IL4       | Interleukin | Protein Co | 48    | GC05P132 | 30.51     | <a href="https://www.genecards.org/cgi-bin/carddisj">https://www.genecards.org/cgi-bin/carddisj</a> |
| BCR       | BCR Activa  | Protein Co | 53    | GC22P023 | 30.16     | <a href="https://www.genecards.org/cgi-bin/carddisj">https://www.genecards.org/cgi-bin/carddisj</a> |
| CCR5      | C-C Motif   | Protein Co | 48    | GC03P046 | 30.05     | <a href="https://www.genecards.org/cgi-bin/carddisj">https://www.genecards.org/cgi-bin/carddisj</a> |
| BDNF      | Brain Deriv | Protein Co | 48    | GC11M027 | 29.94     | <a href="https://www.genecards.org/cgi-bin/carddisj">https://www.genecards.org/cgi-bin/carddisj</a> |
| CTLA4     | Cytotoxic T | Protein Co | 47    | GC02P203 | 29.74     | <a href="https://www.genecards.org/cgi-bin/carddisj">https://www.genecards.org/cgi-bin/carddisj</a> |
| ACP5      | Acid Phos   | Protein Co | 48    | GC19M011 | 29.72     | <a href="https://www.genecards.org/cgi-bin/carddisj">https://www.genecards.org/cgi-bin/carddisj</a> |
| F2        | Coagulatio  | Protein Co | 50    | GC11P046 | 29.48     | <a href="https://www.genecards.org/cgi-bin/carddisj">https://www.genecards.org/cgi-bin/carddisj</a> |
| INS       | Insulin     | Protein Co | 50    | GC11M002 | 29.43     | <a href="https://www.genecards.org/cgi-bin/carddisj">https://www.genecards.org/cgi-bin/carddisj</a> |
| NTRK1     | Neurotrop   | Protein Co | 50    | GC01P156 | 28.07     | <a href="https://www.genecards.org/cgi-bin/carddisj">https://www.genecards.org/cgi-bin/carddisj</a> |
| PSTPIP1   | Proline-Se  | Protein Co | 45    | GC15P076 | 27.59     | <a href="https://www.genecards.org/cgi-bin/carddisj">https://www.genecards.org/cgi-bin/carddisj</a> |
| IFNGR1    | Interferon  | Protein Co | 51    | GC06M137 | 27.51     | <a href="https://www.genecards.org/cgi-bin/carddisj">https://www.genecards.org/cgi-bin/carddisj</a> |
| IL2RA     | Interleukin | Protein Co | 52    | GC10M006 | 27.36     | <a href="https://www.genecards.org/cgi-bin/carddisj">https://www.genecards.org/cgi-bin/carddisj</a> |
| SPTLC2    | Serine Palr | Protein Co | 49    | GC14M077 | 27.02     | <a href="https://www.genecards.org/cgi-bin/carddisj">https://www.genecards.org/cgi-bin/carddisj</a> |
| NGF       | Nerve Grov  | Protein Co | 52    | GC01M115 | 25.81     | <a href="https://www.genecards.org/cgi-bin/carddisj">https://www.genecards.org/cgi-bin/carddisj</a> |
| ABCB1     | ATP Bindin  | Protein Co | 52    | GC07M087 | 25.79     | <a href="https://www.genecards.org/cgi-bin/carddisj">https://www.genecards.org/cgi-bin/carddisj</a> |
| CCL2      | C-C Motif   | Protein Co | 50    | GC17P034 | 25.67     | <a href="https://www.genecards.org/cgi-bin/carddisj">https://www.genecards.org/cgi-bin/carddisj</a> |
| CSF3      | Colony Stir | Protein Co | 41    | GC17P040 | 25.65     | <a href="https://www.genecards.org/cgi-bin/carddisj">https://www.genecards.org/cgi-bin/carddisj</a> |
| SOD1      | Superoxide  | Protein Co | 54    | GC21P031 | 25.58     | <a href="https://www.genecards.org/cgi-bin/carddisj">https://www.genecards.org/cgi-bin/carddisj</a> |
| SETBP1    | SET Bindin  | Protein Co | 41    | GC18P044 | 25.34     | <a href="https://www.genecards.org/cgi-bin/carddisj">https://www.genecards.org/cgi-bin/carddisj</a> |
| FOXP3     | Forkhead E  | Protein Co | 48    | GC0XM049 | 25.02     | <a href="https://www.genecards.org/cgi-bin/carddisj">https://www.genecards.org/cgi-bin/carddisj</a> |
| NRAS      | NRAS Prot   | Protein Co | 51    | GC01M114 | 24.86     | <a href="https://www.genecards.org/cgi-bin/carddisj">https://www.genecards.org/cgi-bin/carddisj</a> |
| ITGAM     | Integrin Su | Protein Co | 48    | GC16P031 | 24.67     | <a href="https://www.genecards.org/cgi-bin/carddisj">https://www.genecards.org/cgi-bin/carddisj</a> |
| HRAS      | HRas Prot   | Protein Co | 53    | GC11M000 | 24.56     | <a href="https://www.genecards.org/cgi-bin/carddisj">https://www.genecards.org/cgi-bin/carddisj</a> |
| MECOM     | MDS1 And    | Protein Co | 48    | GC03M169 | 24.26     | <a href="https://www.genecards.org/cgi-bin/carddisj">https://www.genecards.org/cgi-bin/carddisj</a> |
| TLR2      | Toll Like R | Protein Co | 52    | GC04P153 | 24.2      | <a href="https://www.genecards.org/cgi-bin/carddisj">https://www.genecards.org/cgi-bin/carddisj</a> |
| CLCN7     | Chloride V  | Protein Co | 47    | GC16M001 | 24.12     | <a href="https://www.genecards.org/cgi-bin/carddisj">https://www.genecards.org/cgi-bin/carddisj</a> |

|          |                        |    |          |       |                                                                                                     |
|----------|------------------------|----|----------|-------|-----------------------------------------------------------------------------------------------------|
| NOS3     | Nitric Oxid Protein Co | 52 | GC07P150 | 23.81 | <a href="https://www.genecards.org/cgi-bin/carddisj">https://www.genecards.org/cgi-bin/carddisj</a> |
| TTR      | Transthyre Protein Co  | 51 | GC18P031 | 23.64 | <a href="https://www.genecards.org/cgi-bin/carddisj">https://www.genecards.org/cgi-bin/carddisj</a> |
| RETREG1  | Reticuloph Protein Co  | 32 | GC05M016 | 23.51 | <a href="https://www.genecards.org/cgi-bin/carddisj">https://www.genecards.org/cgi-bin/carddisj</a> |
| BTB      | Bruton Tyr Protein Co  | 55 | GC0XM10  | 23.48 | <a href="https://www.genecards.org/cgi-bin/carddisj">https://www.genecards.org/cgi-bin/carddisj</a> |
| PRTN3    | Proteinase Protein Co  | 46 | GC19P000 | 23.44 | <a href="https://www.genecards.org/cgi-bin/carddisj">https://www.genecards.org/cgi-bin/carddisj</a> |
| CCL5     | C-C Motif Protein Co   | 45 | GC17M035 | 23.41 | <a href="https://www.genecards.org/cgi-bin/carddisj">https://www.genecards.org/cgi-bin/carddisj</a> |
| B2M      | Beta-2-Mi Protein Co   | 50 | GC15P044 | 23.35 | <a href="https://www.genecards.org/cgi-bin/carddisj">https://www.genecards.org/cgi-bin/carddisj</a> |
| MBL2     | Mannose E Protein Co   | 48 | GC10M052 | 23.35 | <a href="https://www.genecards.org/cgi-bin/carddisj">https://www.genecards.org/cgi-bin/carddisj</a> |
| ANO5     | Anoctamin Protein Co   | 39 | GC11P021 | 23.34 | <a href="https://www.genecards.org/cgi-bin/carddisj">https://www.genecards.org/cgi-bin/carddisj</a> |
| G6PD     | Glucose-6 Protein Co   | 52 | GC0XM154 | 23.33 | <a href="https://www.genecards.org/cgi-bin/carddisj">https://www.genecards.org/cgi-bin/carddisj</a> |
| COMT     | Catechol-( Protein Co  | 52 | GC22P019 | 22.79 | <a href="https://www.genecards.org/cgi-bin/carddisj">https://www.genecards.org/cgi-bin/carddisj</a> |
| MMP9     | Matrix Met Protein Co  | 54 | GC20P046 | 22.7  | <a href="https://www.genecards.org/cgi-bin/carddisj">https://www.genecards.org/cgi-bin/carddisj</a> |
| ALB      | Albumin Protein Co     | 51 | GC04P073 | 22.63 | <a href="https://www.genecards.org/cgi-bin/carddisj">https://www.genecards.org/cgi-bin/carddisj</a> |
| HBB      | Hemoglob Protein Co    | 47 | GC11M005 | 22.43 | <a href="https://www.genecards.org/cgi-bin/carddisj">https://www.genecards.org/cgi-bin/carddisj</a> |
| ELN      | Elastin Protein Co     | 45 | GC07P074 | 22.28 | <a href="https://www.genecards.org/cgi-bin/carddisj">https://www.genecards.org/cgi-bin/carddisj</a> |
| TLR5     | Toll Like R Protein Co | 49 | GC01M225 | 22.16 | <a href="https://www.genecards.org/cgi-bin/carddisj">https://www.genecards.org/cgi-bin/carddisj</a> |
| IL17A    | Interleukin Protein Co | 44 | GC06P052 | 21.98 | <a href="https://www.genecards.org/cgi-bin/carddisj">https://www.genecards.org/cgi-bin/carddisj</a> |
| IL1A     | Interleukin Protein Co | 45 | GC02M112 | 21.97 | <a href="https://www.genecards.org/cgi-bin/carddisj">https://www.genecards.org/cgi-bin/carddisj</a> |
| MIR142   | MicroRNA RNA Gene      | 20 | GC17M055 | 21.93 | <a href="https://www.genecards.org/cgi-bin/carddisj">https://www.genecards.org/cgi-bin/carddisj</a> |
| IGHM     | Immunoglob Protein Co  | 32 | GC14M105 | 21.85 | <a href="https://www.genecards.org/cgi-bin/carddisj">https://www.genecards.org/cgi-bin/carddisj</a> |
| HLA-B    | Major Hist Protein Co  | 46 | GC06M031 | 21.77 | <a href="https://www.genecards.org/cgi-bin/carddisj">https://www.genecards.org/cgi-bin/carddisj</a> |
| CASP1    | Caspase 1 Protein Co   | 51 | GC11M105 | 21.73 | <a href="https://www.genecards.org/cgi-bin/carddisj">https://www.genecards.org/cgi-bin/carddisj</a> |
| CXCL10   | C-X-C Mo Protein Co    | 45 | GC04M076 | 21.56 | <a href="https://www.genecards.org/cgi-bin/carddisj">https://www.genecards.org/cgi-bin/carddisj</a> |
| STAT5B   | Signal Tran Protein Co | 50 | GC17M042 | 21.45 | <a href="https://www.genecards.org/cgi-bin/carddisj">https://www.genecards.org/cgi-bin/carddisj</a> |
| HLA-DRB1 | Major Hist Protein Co  | 47 | GC06M032 | 21.39 | <a href="https://www.genecards.org/cgi-bin/carddisj">https://www.genecards.org/cgi-bin/carddisj</a> |
| CALCA    | Calcitonin Protein Co  | 44 | GC11M014 | 21.38 | <a href="https://www.genecards.org/cgi-bin/carddisj">https://www.genecards.org/cgi-bin/carddisj</a> |
| TCIRG1   | T Cell Imm Protein Co  | 45 | GC11P068 | 21.09 | <a href="https://www.genecards.org/cgi-bin/carddisj">https://www.genecards.org/cgi-bin/carddisj</a> |
| CSF2     | Colony Stim Protein Co | 45 | GC05P132 | 21.06 | <a href="https://www.genecards.org/cgi-bin/carddisj">https://www.genecards.org/cgi-bin/carddisj</a> |
| CTSK     | Cathepsin Protein Co   | 50 | GC01M150 | 21.05 | <a href="https://www.genecards.org/cgi-bin/carddisj">https://www.genecards.org/cgi-bin/carddisj</a> |
| ELANE    | Elastase, N Protein Co | 48 | GC19P000 | 20.95 | <a href="https://www.genecards.org/cgi-bin/carddisj">https://www.genecards.org/cgi-bin/carddisj</a> |
| FCGR2A   | Fc Fragme Protein Co   | 47 | GC01P161 | 20.92 | <a href="https://www.genecards.org/cgi-bin/carddisj">https://www.genecards.org/cgi-bin/carddisj</a> |
| SH3TC2   | SH3 Doma Protein Co    | 39 | GC05M145 | 20.8  | <a href="https://www.genecards.org/cgi-bin/carddisj">https://www.genecards.org/cgi-bin/carddisj</a> |
| AIRE     | Autoimmu Protein Co    | 46 | GC21P044 | 20.79 | <a href="https://www.genecards.org/cgi-bin/carddisj">https://www.genecards.org/cgi-bin/carddisj</a> |
| HMOX1    | Heme Oxy Protein Co    | 54 | GC22P035 | 20.74 | <a href="https://www.genecards.org/cgi-bin/carddisj">https://www.genecards.org/cgi-bin/carddisj</a> |
| TNFRSF1B | TNF Recep Protein Co   | 49 | GC01P012 | 20.69 | <a href="https://www.genecards.org/cgi-bin/carddisj">https://www.genecards.org/cgi-bin/carddisj</a> |
| TNFRSF11 | TNF Recep Protein Co   | 49 | GC08M115 | 20.64 | <a href="https://www.genecards.org/cgi-bin/carddisj">https://www.genecards.org/cgi-bin/carddisj</a> |
| APOE     | Apolipoprc Protein Co  | 52 | GC19P044 | 20.53 | <a href="https://www.genecards.org/cgi-bin/carddisj">https://www.genecards.org/cgi-bin/carddisj</a> |
| CXCR4    | C-X-C Mo Protein Co    | 54 | GC02M136 | 20.31 | <a href="https://www.genecards.org/cgi-bin/carddisj">https://www.genecards.org/cgi-bin/carddisj</a> |
| MT-CYB   | Mitochondc Protein Co  | 32 | GCMTPO14 | 20.26 | <a href="https://www.genecards.org/cgi-bin/carddisj">https://www.genecards.org/cgi-bin/carddisj</a> |
| ITGB2    | Integrin Su Protein Co | 52 | GC21M044 | 20.26 | <a href="https://www.genecards.org/cgi-bin/carddisj">https://www.genecards.org/cgi-bin/carddisj</a> |
| SCN9A    | Sodium Vc Protein Co   | 48 | GC02M166 | 20.08 | <a href="https://www.genecards.org/cgi-bin/carddisj">https://www.genecards.org/cgi-bin/carddisj</a> |
| BRAF     | B-Raf Prot Protein Co  | 55 | GC07M140 | 20.01 | <a href="https://www.genecards.org/cgi-bin/carddisj">https://www.genecards.org/cgi-bin/carddisj</a> |
| JAK3     | Janus Kina Protein Co  | 53 | GC19M017 | 20.01 | <a href="https://www.genecards.org/cgi-bin/carddisj">https://www.genecards.org/cgi-bin/carddisj</a> |
| COL1A1   | Collagen T Protein Co  | 52 | GC17M050 | 19.9  | <a href="https://www.genecards.org/cgi-bin/carddisj">https://www.genecards.org/cgi-bin/carddisj</a> |
| DNMT1    | DNA Meth Protein Co    | 52 | GC19M010 | 19.78 | <a href="https://www.genecards.org/cgi-bin/carddisj">https://www.genecards.org/cgi-bin/carddisj</a> |
| MIR21    | MicroRNA RNA Gene      | 24 | GC17P059 | 19.76 | <a href="https://www.genecards.org/cgi-bin/carddisj">https://www.genecards.org/cgi-bin/carddisj</a> |
| MMP1     | Matrix Met Protein Co  | 53 | GC11M102 | 19.52 | <a href="https://www.genecards.org/cgi-bin/carddisj">https://www.genecards.org/cgi-bin/carddisj</a> |
| BGLAP    | Bone Gam Protein Co    | 41 | GC01P156 | 19.48 | <a href="https://www.genecards.org/cgi-bin/carddisj">https://www.genecards.org/cgi-bin/carddisj</a> |
| MIR223   | MicroRNA RNA Gene      | 22 | GC0XP066 | 19.48 | <a href="https://www.genecards.org/cgi-bin/carddisj">https://www.genecards.org/cgi-bin/carddisj</a> |
| WNK1     | WNK Lysin Protein Co   | 48 | GC12P000 | 19.29 | <a href="https://www.genecards.org/cgi-bin/carddisj">https://www.genecards.org/cgi-bin/carddisj</a> |
| CD28     | CD28 Mole Protein Co   | 48 | GC02P203 | 19.21 | <a href="https://www.genecards.org/cgi-bin/carddisj">https://www.genecards.org/cgi-bin/carddisj</a> |
| POLG     | DNA Polyn Protein Co   | 47 | GC15M085 | 19.2  | <a href="https://www.genecards.org/cgi-bin/carddisj">https://www.genecards.org/cgi-bin/carddisj</a> |
| PIK3R1   | Phosphoin Protein Co   | 52 | GC05P068 | 19.19 | <a href="https://www.genecards.org/cgi-bin/carddisj">https://www.genecards.org/cgi-bin/carddisj</a> |
| IL2      | Interleukin Protein Co | 47 | GC04M122 | 18.82 | <a href="https://www.genecards.org/cgi-bin/carddisj">https://www.genecards.org/cgi-bin/carddisj</a> |
| DNMT3A   | DNA Meth Protein Co    | 52 | GC02M025 | 18.76 | <a href="https://www.genecards.org/cgi-bin/carddisj">https://www.genecards.org/cgi-bin/carddisj</a> |
| MPV17    | Mitochondc Protein Co  | 43 | GC02M027 | 18.56 | <a href="https://www.genecards.org/cgi-bin/carddisj">https://www.genecards.org/cgi-bin/carddisj</a> |
| CAT      | Catalase Protein Co    | 51 | GC11P034 | 18.44 | <a href="https://www.genecards.org/cgi-bin/carddisj">https://www.genecards.org/cgi-bin/carddisj</a> |
| FCGR3B   | Fc Fragme Protein Co   | 44 | GC01M161 | 18.39 | <a href="https://www.genecards.org/cgi-bin/carddisj">https://www.genecards.org/cgi-bin/carddisj</a> |

|          |                        |             |       |                                                                                                     |
|----------|------------------------|-------------|-------|-----------------------------------------------------------------------------------------------------|
| CD79B    | CD79b MoProtein Co     | 48 GC17M063 | 18.32 | <a href="https://www.genecards.org/cgi-bin/carddisj">https://www.genecards.org/cgi-bin/carddisj</a> |
| CCR6     | C-C Motif Protein Co   | 46 GC06P167 | 18.11 | <a href="https://www.genecards.org/cgi-bin/carddisj">https://www.genecards.org/cgi-bin/carddisj</a> |
| XK       | X-Linked KProtein Co   | 41 GC0XP037 | 17.99 | <a href="https://www.genecards.org/cgi-bin/carddisj">https://www.genecards.org/cgi-bin/carddisj</a> |
| CD4      | CD4 MolecProtein Co    | 51 GC12P006 | 17.97 | <a href="https://www.genecards.org/cgi-bin/carddisj">https://www.genecards.org/cgi-bin/carddisj</a> |
| IL12RB1  | Interleukin Protein Co | 46 GC19M018 | 17.62 | <a href="https://www.genecards.org/cgi-bin/carddisj">https://www.genecards.org/cgi-bin/carddisj</a> |
| MFN2     | Mitofusin 2Protein Co  | 50 GC01P011 | 17.49 | <a href="https://www.genecards.org/cgi-bin/carddisj">https://www.genecards.org/cgi-bin/carddisj</a> |
| TBX21    | T-Box TrarProtein Co   | 47 GC17P047 | 17.47 | <a href="https://www.genecards.org/cgi-bin/carddisj">https://www.genecards.org/cgi-bin/carddisj</a> |
| MPZ      | Myelin ProProtein Co   | 45 GC01M161 | 17.35 | <a href="https://www.genecards.org/cgi-bin/carddisj">https://www.genecards.org/cgi-bin/carddisj</a> |
| NOS2     | Nitric OxidProtein Co  | 51 GC17M027 | 17.24 | <a href="https://www.genecards.org/cgi-bin/carddisj">https://www.genecards.org/cgi-bin/carddisj</a> |
| ICAM1    | IntercellulaProtein Co | 52 GC19P010 | 17.16 | <a href="https://www.genecards.org/cgi-bin/carddisj">https://www.genecards.org/cgi-bin/carddisj</a> |
| PYCARD   | PYD And CProtein Co    | 44 GC16M031 | 17.09 | <a href="https://www.genecards.org/cgi-bin/carddisj">https://www.genecards.org/cgi-bin/carddisj</a> |
| VDR      | Vitamin D Protein Co   | 53 GC12M047 | 17.08 | <a href="https://www.genecards.org/cgi-bin/carddisj">https://www.genecards.org/cgi-bin/carddisj</a> |
| EPO      | ErythropoiProtein Co   | 43 GC07P100 | 16.98 | <a href="https://www.genecards.org/cgi-bin/carddisj">https://www.genecards.org/cgi-bin/carddisj</a> |
| DCTN1    | Dynactin SProtein Co   | 47 GC02M074 | 16.95 | <a href="https://www.genecards.org/cgi-bin/carddisj">https://www.genecards.org/cgi-bin/carddisj</a> |
| IL18     | Interleukin Protein Co | 45 GC11M112 | 16.94 | <a href="https://www.genecards.org/cgi-bin/carddisj">https://www.genecards.org/cgi-bin/carddisj</a> |
| GJB1     | Gap JunctiProtein Co   | 48 GC0XP071 | 16.62 | <a href="https://www.genecards.org/cgi-bin/carddisj">https://www.genecards.org/cgi-bin/carddisj</a> |
| HLA-DQB1 | Major HistProtein Co   | 45 GC06M032 | 16.62 | <a href="https://www.genecards.org/cgi-bin/carddisj">https://www.genecards.org/cgi-bin/carddisj</a> |
| BMP2     | Bone MorpProtein Co    | 48 GC20P006 | 16.59 | <a href="https://www.genecards.org/cgi-bin/carddisj">https://www.genecards.org/cgi-bin/carddisj</a> |
| TLR9     | Toll Like RProtein Co  | 46 GC03M052 | 16.54 | <a href="https://www.genecards.org/cgi-bin/carddisj">https://www.genecards.org/cgi-bin/carddisj</a> |
| DOCK8    | Dedicator PProtein Co  | 44 GC09P000 | 16.52 | <a href="https://www.genecards.org/cgi-bin/carddisj">https://www.genecards.org/cgi-bin/carddisj</a> |
| PIK3CA   | PhosphaticProtein Co   | 54 GC03P179 | 16.49 | <a href="https://www.genecards.org/cgi-bin/carddisj">https://www.genecards.org/cgi-bin/carddisj</a> |
| VEGFA    | Vascular ErProtein Co  | 51 GC06P043 | 16.38 | <a href="https://www.genecards.org/cgi-bin/carddisj">https://www.genecards.org/cgi-bin/carddisj</a> |
| ATP7A    | ATPase CoProtein Co    | 47 GC0XP077 | 16.37 | <a href="https://www.genecards.org/cgi-bin/carddisj">https://www.genecards.org/cgi-bin/carddisj</a> |
| SNCA     | Synuclein PProtein Co  | 51 GC04M089 | 16.2  | <a href="https://www.genecards.org/cgi-bin/carddisj">https://www.genecards.org/cgi-bin/carddisj</a> |
| FGA      | FibrinogenProtein Co   | 48 GC04M154 | 16.12 | <a href="https://www.genecards.org/cgi-bin/carddisj">https://www.genecards.org/cgi-bin/carddisj</a> |
| LRP5     | LDL Recep Protein Co   | 50 GC11P068 | 16.1  | <a href="https://www.genecards.org/cgi-bin/carddisj">https://www.genecards.org/cgi-bin/carddisj</a> |
| PRF1     | Perforin 1 Protein Co  | 47 GC10M070 | 16.1  | <a href="https://www.genecards.org/cgi-bin/carddisj">https://www.genecards.org/cgi-bin/carddisj</a> |
| CLEC7A   | C-Type LeProtein Co    | 45 GC12M013 | 16.06 | <a href="https://www.genecards.org/cgi-bin/carddisj">https://www.genecards.org/cgi-bin/carddisj</a> |
| IRF5     | Interferon Protein Co  | 50 GC07P128 | 15.97 | <a href="https://www.genecards.org/cgi-bin/carddisj">https://www.genecards.org/cgi-bin/carddisj</a> |
| APOA1    | ApolipoprcProtein Co   | 50 GC11M116 | 15.74 | <a href="https://www.genecards.org/cgi-bin/carddisj">https://www.genecards.org/cgi-bin/carddisj</a> |
| EDN1     | Endothelin Protein Co  | 48 GC06P012 | 15.68 | <a href="https://www.genecards.org/cgi-bin/carddisj">https://www.genecards.org/cgi-bin/carddisj</a> |
| FBN1     | Fibrillin 1 Protein Co | 47 GC15M048 | 15.66 | <a href="https://www.genecards.org/cgi-bin/carddisj">https://www.genecards.org/cgi-bin/carddisj</a> |
| MYC      | MYC ProtoProtein Co    | 53 GC08P127 | 15.59 | <a href="https://www.genecards.org/cgi-bin/carddisj">https://www.genecards.org/cgi-bin/carddisj</a> |
| CARD9    | Caspase RProtein Co    | 45 GC09M136 | 15.58 | <a href="https://www.genecards.org/cgi-bin/carddisj">https://www.genecards.org/cgi-bin/carddisj</a> |
| WAS      | WASP ActiProtein Co    | 50 GC0XP048 | 15.42 | <a href="https://www.genecards.org/cgi-bin/carddisj">https://www.genecards.org/cgi-bin/carddisj</a> |
| STAT4    | Signal TrarProtein Co  | 47 GC02M191 | 15.14 | <a href="https://www.genecards.org/cgi-bin/carddisj">https://www.genecards.org/cgi-bin/carddisj</a> |
| RAC2     | Rac Family Protein Co  | 52 GC22M037 | 15.05 | <a href="https://www.genecards.org/cgi-bin/carddisj">https://www.genecards.org/cgi-bin/carddisj</a> |
| CD8A     | CD8a MoleProtein Co    | 48 GC02M086 | 15.05 | <a href="https://www.genecards.org/cgi-bin/carddisj">https://www.genecards.org/cgi-bin/carddisj</a> |
| ATL3     | Atlastin GTProtein Co  | 39 GC11M063 | 15.04 | <a href="https://www.genecards.org/cgi-bin/carddisj">https://www.genecards.org/cgi-bin/carddisj</a> |
| TNFRSF13 | TNF RecepProtein Co    | 45 GC22M044 | 15.03 | <a href="https://www.genecards.org/cgi-bin/carddisj">https://www.genecards.org/cgi-bin/carddisj</a> |
| AKT1     | AKT SerineProtein Co   | 56 GC14M104 | 15.02 | <a href="https://www.genecards.org/cgi-bin/carddisj">https://www.genecards.org/cgi-bin/carddisj</a> |
| MTHFR    | Methylene Protein Co   | 48 GC01M011 | 14.98 | <a href="https://www.genecards.org/cgi-bin/carddisj">https://www.genecards.org/cgi-bin/carddisj</a> |
| TF       | Transferrin Protein Co | 51 GC03P133 | 14.97 | <a href="https://www.genecards.org/cgi-bin/carddisj">https://www.genecards.org/cgi-bin/carddisj</a> |
| PLEKHM1  | Pleckstrin PProtein Co | 42 GC17M045 | 14.95 | <a href="https://www.genecards.org/cgi-bin/carddisj">https://www.genecards.org/cgi-bin/carddisj</a> |
| LTF      | LactotransfProtein Co  | 45 GC03M046 | 14.81 | <a href="https://www.genecards.org/cgi-bin/carddisj">https://www.genecards.org/cgi-bin/carddisj</a> |
| RAB7A    | RAB7A, MeProtein Co    | 49 GC03P128 | 14.7  | <a href="https://www.genecards.org/cgi-bin/carddisj">https://www.genecards.org/cgi-bin/carddisj</a> |
| IL7R     | Interleukin Protein Co | 48 GC05P035 | 14.7  | <a href="https://www.genecards.org/cgi-bin/carddisj">https://www.genecards.org/cgi-bin/carddisj</a> |
| GBA      | Glucosylce Protein Co  | 49 GC01M155 | 14.68 | <a href="https://www.genecards.org/cgi-bin/carddisj">https://www.genecards.org/cgi-bin/carddisj</a> |
| CCL27    | C-C Motif Protein Co   | 39 GC09M034 | 14.66 | <a href="https://www.genecards.org/cgi-bin/carddisj">https://www.genecards.org/cgi-bin/carddisj</a> |
| MRAP     | MelanocorProtein Co    | 37 GC21P032 | 14.64 | <a href="https://www.genecards.org/cgi-bin/carddisj">https://www.genecards.org/cgi-bin/carddisj</a> |
| ARSA     | ArylsulfataProtein Co  | 48 GC22M050 | 14.6  | <a href="https://www.genecards.org/cgi-bin/carddisj">https://www.genecards.org/cgi-bin/carddisj</a> |
| KIF1A    | Kinesin FarProtein Co  | 44 GC02M240 | 14.57 | <a href="https://www.genecards.org/cgi-bin/carddisj">https://www.genecards.org/cgi-bin/carddisj</a> |
| APOL1    | ApolipoprcProtein Co   | 43 GC22P036 | 14.35 | <a href="https://www.genecards.org/cgi-bin/carddisj">https://www.genecards.org/cgi-bin/carddisj</a> |
| ATL1     | Atlastin GTProtein Co  | 42 GC14P050 | 14.33 | <a href="https://www.genecards.org/cgi-bin/carddisj">https://www.genecards.org/cgi-bin/carddisj</a> |
| HP       | HaptoglobProtein Co    | 45 GC16P072 | 14.33 | <a href="https://www.genecards.org/cgi-bin/carddisj">https://www.genecards.org/cgi-bin/carddisj</a> |
| BCL10    | BCL10 ImnProtein Co    | 47 GC01M085 | 14.24 | <a href="https://www.genecards.org/cgi-bin/carddisj">https://www.genecards.org/cgi-bin/carddisj</a> |
| LACC1    | Laccase DcProtein Co   | 35 GC13P043 | 14.18 | <a href="https://www.genecards.org/cgi-bin/carddisj">https://www.genecards.org/cgi-bin/carddisj</a> |
| PKLR     | Pyruvate KProtein Co   | 49 GC01M155 | 14.14 | <a href="https://www.genecards.org/cgi-bin/carddisj">https://www.genecards.org/cgi-bin/carddisj</a> |

|          |                         |    |          |       |                                                                                                     |
|----------|-------------------------|----|----------|-------|-----------------------------------------------------------------------------------------------------|
| PGM3     | Phosphogl Protein Co    | 44 | GC06M083 | 13.95 | <a href="https://www.genecards.org/cgi-bin/carddisj">https://www.genecards.org/cgi-bin/carddisj</a> |
| NPPB     | Natriuretic Protein Co  | 45 | GC01M011 | 13.93 | <a href="https://www.genecards.org/cgi-bin/carddisj">https://www.genecards.org/cgi-bin/carddisj</a> |
| SRC      | SRC Proto-Protein Co    | 53 | GC20P037 | 13.93 | <a href="https://www.genecards.org/cgi-bin/carddisj">https://www.genecards.org/cgi-bin/carddisj</a> |
| GLA      | Galactosid Protein Co   | 50 | GC0XM101 | 13.92 | <a href="https://www.genecards.org/cgi-bin/carddisj">https://www.genecards.org/cgi-bin/carddisj</a> |
| IL10RA   | Interleukin Protein Co  | 47 | GC11P117 | 13.86 | <a href="https://www.genecards.org/cgi-bin/carddisj">https://www.genecards.org/cgi-bin/carddisj</a> |
| MGP      | Matrix Gla Protein Co   | 43 | GC12M014 | 13.83 | <a href="https://www.genecards.org/cgi-bin/carddisj">https://www.genecards.org/cgi-bin/carddisj</a> |
| PSAP     | Prosaposin Protein Co   | 47 | GC10M071 | 13.83 | <a href="https://www.genecards.org/cgi-bin/carddisj">https://www.genecards.org/cgi-bin/carddisj</a> |
| SAA1     | Serum Am Protein Co     | 43 | GC11P018 | 13.77 | <a href="https://www.genecards.org/cgi-bin/carddisj">https://www.genecards.org/cgi-bin/carddisj</a> |
| NEFL     | Neurofilan Protein Co   | 47 | GC08M024 | 13.76 | <a href="https://www.genecards.org/cgi-bin/carddisj">https://www.genecards.org/cgi-bin/carddisj</a> |
| CD40     | CD40 Mole Protein Co    | 50 | GC20P046 | 13.76 | <a href="https://www.genecards.org/cgi-bin/carddisj">https://www.genecards.org/cgi-bin/carddisj</a> |
| FBLIM1   | Filamin Bin Protein Co  | 39 | GC01P015 | 13.71 | <a href="https://www.genecards.org/cgi-bin/carddisj">https://www.genecards.org/cgi-bin/carddisj</a> |
| H2AC18   | H2A Cluste Protein Co   | 27 | GC01M149 | 13.58 | <a href="https://www.genecards.org/cgi-bin/carddisj">https://www.genecards.org/cgi-bin/carddisj</a> |
| MIR16-1  | MicroRNA RNA Gene       | 22 | GC13M050 | 13.54 | <a href="https://www.genecards.org/cgi-bin/carddisj">https://www.genecards.org/cgi-bin/carddisj</a> |
| GDAP1    | Gangliosid Protein Co   | 43 | GC08P074 | 13.36 | <a href="https://www.genecards.org/cgi-bin/carddisj">https://www.genecards.org/cgi-bin/carddisj</a> |
| SELP     | Selectin P Protein Co   | 47 | GC01M169 | 13.35 | <a href="https://www.genecards.org/cgi-bin/carddisj">https://www.genecards.org/cgi-bin/carddisj</a> |
| TNFRSF11 | TNF Recep Protein Co    | 47 | GC18P062 | 13.25 | <a href="https://www.genecards.org/cgi-bin/carddisj">https://www.genecards.org/cgi-bin/carddisj</a> |
| PTGS2    | Prostaglan Protein Co   | 50 | GC01M186 | 13.17 | <a href="https://www.genecards.org/cgi-bin/carddisj">https://www.genecards.org/cgi-bin/carddisj</a> |
| BLNK     | B Cell Link Protein Co  | 49 | GC10M096 | 13.15 | <a href="https://www.genecards.org/cgi-bin/carddisj">https://www.genecards.org/cgi-bin/carddisj</a> |
| FLVCR1   | FLVCR Her Protein Co    | 41 | GC01P212 | 13.14 | <a href="https://www.genecards.org/cgi-bin/carddisj">https://www.genecards.org/cgi-bin/carddisj</a> |
| VCAM1    | Vascular C Protein Co   | 47 | GC01P100 | 13.11 | <a href="https://www.genecards.org/cgi-bin/carddisj">https://www.genecards.org/cgi-bin/carddisj</a> |
| CCT5     | Chaperoni Protein Co    | 45 | GC05P010 | 13.02 | <a href="https://www.genecards.org/cgi-bin/carddisj">https://www.genecards.org/cgi-bin/carddisj</a> |
| CD36     | CD36 Mole Protein Co    | 50 | GC07P080 | 12.98 | <a href="https://www.genecards.org/cgi-bin/carddisj">https://www.genecards.org/cgi-bin/carddisj</a> |
| CD34     | CD34 Mole Protein Co    | 45 | GC01M207 | 12.87 | <a href="https://www.genecards.org/cgi-bin/carddisj">https://www.genecards.org/cgi-bin/carddisj</a> |
| TNFSF13B | TNF Super Protein Co    | 47 | GC13P108 | 12.87 | <a href="https://www.genecards.org/cgi-bin/carddisj">https://www.genecards.org/cgi-bin/carddisj</a> |
| KIF1B    | Kinesin Far Protein Co  | 45 | GC01P010 | 12.86 | <a href="https://www.genecards.org/cgi-bin/carddisj">https://www.genecards.org/cgi-bin/carddisj</a> |
| NFKB1    | Nuclear Fa Protein Co   | 54 | GC04P102 | 12.78 | <a href="https://www.genecards.org/cgi-bin/carddisj">https://www.genecards.org/cgi-bin/carddisj</a> |
| TCF3     | Transcripti Protein Co  | 47 | GC19M001 | 12.75 | <a href="https://www.genecards.org/cgi-bin/carddisj">https://www.genecards.org/cgi-bin/carddisj</a> |
| CYBC1    | Cytochrom Protein Co    | 27 | GC17M082 | 12.71 | <a href="https://www.genecards.org/cgi-bin/carddisj">https://www.genecards.org/cgi-bin/carddisj</a> |
| PRKN     | Parkin RBR Protein Co   | 41 | GC06M161 | 12.7  | <a href="https://www.genecards.org/cgi-bin/carddisj">https://www.genecards.org/cgi-bin/carddisj</a> |
| RELCH    | RAB11 Bin Protein Co    | 28 | GC18P062 | 12.66 | <a href="https://www.genecards.org/cgi-bin/carddisj">https://www.genecards.org/cgi-bin/carddisj</a> |
| CSF1     | Colony Stir Protein Co  | 45 | GC01P109 | 12.64 | <a href="https://www.genecards.org/cgi-bin/carddisj">https://www.genecards.org/cgi-bin/carddisj</a> |
| STAT5A   | Signal Trar Protein Co  | 47 | GC17P042 | 12.54 | <a href="https://www.genecards.org/cgi-bin/carddisj">https://www.genecards.org/cgi-bin/carddisj</a> |
| IGHMBP2  | Immunogl Protein Co     | 42 | GC11P068 | 12.52 | <a href="https://www.genecards.org/cgi-bin/carddisj">https://www.genecards.org/cgi-bin/carddisj</a> |
| SERPINA3 | Serpin Far Protein Co   | 45 | GC14P094 | 12.46 | <a href="https://www.genecards.org/cgi-bin/carddisj">https://www.genecards.org/cgi-bin/carddisj</a> |
| GARS1    | Glycyl-TRN Protein Co   | 37 | GC07P030 | 12.45 | <a href="https://www.genecards.org/cgi-bin/carddisj">https://www.genecards.org/cgi-bin/carddisj</a> |
| HECTD4   | HECT Dom Protein Co     | 32 | GC12M112 | 12.4  | <a href="https://www.genecards.org/cgi-bin/carddisj">https://www.genecards.org/cgi-bin/carddisj</a> |
| KITLG    | KIT Ligand Protein Co   | 45 | GC12M088 | 12.38 | <a href="https://www.genecards.org/cgi-bin/carddisj">https://www.genecards.org/cgi-bin/carddisj</a> |
| LOX      | Lysyl Oxid Protein Co   | 46 | GC05M122 | 12.35 | <a href="https://www.genecards.org/cgi-bin/carddisj">https://www.genecards.org/cgi-bin/carddisj</a> |
| IL36RN   | Interleukin Protein Co  | 41 | GC02P114 | 12.34 | <a href="https://www.genecards.org/cgi-bin/carddisj">https://www.genecards.org/cgi-bin/carddisj</a> |
| ICOSLG   | Inducible T Protein Co  | 40 | GC21M044 | 12.33 | <a href="https://www.genecards.org/cgi-bin/carddisj">https://www.genecards.org/cgi-bin/carddisj</a> |
| DNAH8    | Dynein Axi Protein Co   | 38 | GC06P046 | 12.32 | <a href="https://www.genecards.org/cgi-bin/carddisj">https://www.genecards.org/cgi-bin/carddisj</a> |
| CASP8    | Caspase 8 Protein Co    | 54 | GC02P201 | 12.3  | <a href="https://www.genecards.org/cgi-bin/carddisj">https://www.genecards.org/cgi-bin/carddisj</a> |
| SELL     | Selectin L Protein Co   | 44 | GC01M169 | 12.19 | <a href="https://www.genecards.org/cgi-bin/carddisj">https://www.genecards.org/cgi-bin/carddisj</a> |
| LOC11080 | TERT 5' Re Biological I | 2  | GC05U902 | 12.16 | <a href="https://www.genecards.org/cgi-bin/carddisj">https://www.genecards.org/cgi-bin/carddisj</a> |
| NAA50    | N-Alpha-/Protein Co     | 38 | GC03M113 | 12.13 | <a href="https://www.genecards.org/cgi-bin/carddisj">https://www.genecards.org/cgi-bin/carddisj</a> |
| HEXA     | Hexosamir Protein Co    | 47 | GC15M072 | 12.06 | <a href="https://www.genecards.org/cgi-bin/carddisj">https://www.genecards.org/cgi-bin/carddisj</a> |
| CCR7     | C-C Motif Protein Co    | 46 | GC17M040 | 12.05 | <a href="https://www.genecards.org/cgi-bin/carddisj">https://www.genecards.org/cgi-bin/carddisj</a> |
| HSPA4    | Heat Shoc Protein Co    | 43 | GC05P133 | 12.01 | <a href="https://www.genecards.org/cgi-bin/carddisj">https://www.genecards.org/cgi-bin/carddisj</a> |
| TNFRSF1A | TNF Recep Protein Co    | 51 | GC12M006 | 11.98 | <a href="https://www.genecards.org/cgi-bin/carddisj">https://www.genecards.org/cgi-bin/carddisj</a> |
| SOST     | Sclerostin Protein Co   | 45 | GC17M043 | 11.98 | <a href="https://www.genecards.org/cgi-bin/carddisj">https://www.genecards.org/cgi-bin/carddisj</a> |
| LACTB    | Lactamase Protein Co    | 37 | GC15P071 | 11.97 | <a href="https://www.genecards.org/cgi-bin/carddisj">https://www.genecards.org/cgi-bin/carddisj</a> |
| RNASE3   | Ribonucle Protein Co    | 41 | GC14P020 | 11.93 | <a href="https://www.genecards.org/cgi-bin/carddisj">https://www.genecards.org/cgi-bin/carddisj</a> |
| KMT2A    | Lysine Met Protein Co   | 45 | GC11P118 | 11.83 | <a href="https://www.genecards.org/cgi-bin/carddisj">https://www.genecards.org/cgi-bin/carddisj</a> |
| SELE     | Selectin E Protein Co   | 45 | GC01M169 | 11.82 | <a href="https://www.genecards.org/cgi-bin/carddisj">https://www.genecards.org/cgi-bin/carddisj</a> |
| COL1A2   | Collagen T Protein Co   | 48 | GC07P094 | 11.81 | <a href="https://www.genecards.org/cgi-bin/carddisj">https://www.genecards.org/cgi-bin/carddisj</a> |
| SLC17A5  | Solute Car Protein Co   | 45 | GC06M073 | 11.76 | <a href="https://www.genecards.org/cgi-bin/carddisj">https://www.genecards.org/cgi-bin/carddisj</a> |
| OCRL     | OCRL Inosi Protein Co   | 45 | GC0XP129 | 11.73 | <a href="https://www.genecards.org/cgi-bin/carddisj">https://www.genecards.org/cgi-bin/carddisj</a> |
| CCN2     | Cellular Co Protein Co  | 40 | GC06M131 | 11.71 | <a href="https://www.genecards.org/cgi-bin/carddisj">https://www.genecards.org/cgi-bin/carddisj</a> |

|          |                                                    |    |          |       |                                                                                                     |
|----------|----------------------------------------------------|----|----------|-------|-----------------------------------------------------------------------------------------------------|
| DUOX2    | Dual Oxidase Protein Co                            | 44 | GC15M045 | 11.64 | <a href="https://www.genecards.org/cgi-bin/carddisj">https://www.genecards.org/cgi-bin/carddisj</a> |
| CYCS     | Cytochrome Protein Co                              | 50 | GC07M025 | 11.57 | <a href="https://www.genecards.org/cgi-bin/carddisj">https://www.genecards.org/cgi-bin/carddisj</a> |
| UGT1A1   | UDP Glucuronidase Protein Co                       | 50 | GC02P233 | 11.56 | <a href="https://www.genecards.org/cgi-bin/carddisj">https://www.genecards.org/cgi-bin/carddisj</a> |
| LRRC8A   | Leucine Rich Protein Co                            | 41 | GC09P128 | 11.51 | <a href="https://www.genecards.org/cgi-bin/carddisj">https://www.genecards.org/cgi-bin/carddisj</a> |
| BAX      | BCL2 Associated Protein Co                         | 50 | GC19P048 | 11.46 | <a href="https://www.genecards.org/cgi-bin/carddisj">https://www.genecards.org/cgi-bin/carddisj</a> |
| ITGAX    | Integrin Subunit Protein Co                        | 45 | GC16P031 | 11.43 | <a href="https://www.genecards.org/cgi-bin/carddisj">https://www.genecards.org/cgi-bin/carddisj</a> |
| CPT1B    | Carnitine Palmitoyltransferase Protein Co          | 45 | GC22M050 | 11.41 | <a href="https://www.genecards.org/cgi-bin/carddisj">https://www.genecards.org/cgi-bin/carddisj</a> |
| NFKB2    | Nuclear Factor of Kappa B Protein Co               | 54 | GC10P102 | 11.4  | <a href="https://www.genecards.org/cgi-bin/carddisj">https://www.genecards.org/cgi-bin/carddisj</a> |
| DZIP1L   | DAZ Interacting Protein Co                         | 37 | GC03M138 | 11.39 | <a href="https://www.genecards.org/cgi-bin/carddisj">https://www.genecards.org/cgi-bin/carddisj</a> |
| PSTPIP2  | Proline-Serine Protein Co                          | 37 | GC18M045 | 11.36 | <a href="https://www.genecards.org/cgi-bin/carddisj">https://www.genecards.org/cgi-bin/carddisj</a> |
| CHI3L1   | Chitinase 3 Protein Co                             | 45 | GC01M203 | 11.36 | <a href="https://www.genecards.org/cgi-bin/carddisj">https://www.genecards.org/cgi-bin/carddisj</a> |
| IGF2R    | Insulin Like Growth Factor Receptor Protein Co     | 47 | GC06P159 | 11.36 | <a href="https://www.genecards.org/cgi-bin/carddisj">https://www.genecards.org/cgi-bin/carddisj</a> |
| HSP90AA1 | Heat Shock Protein 90A Class A Member 1 Protein Co | 50 | GC14M102 | 11.35 | <a href="https://www.genecards.org/cgi-bin/carddisj">https://www.genecards.org/cgi-bin/carddisj</a> |
| SLC5A1   | Solute Carrier Family 5 Member 1 Protein Co        | 51 | GC22P032 | 11.33 | <a href="https://www.genecards.org/cgi-bin/carddisj">https://www.genecards.org/cgi-bin/carddisj</a> |
| SST      | Somatostatin Receptor Protein Co                   | 43 | GC03M187 | 11.31 | <a href="https://www.genecards.org/cgi-bin/carddisj">https://www.genecards.org/cgi-bin/carddisj</a> |
| CCND2    | Cyclin D2 Protein Co                               | 51 | GC12P006 | 11.28 | <a href="https://www.genecards.org/cgi-bin/carddisj">https://www.genecards.org/cgi-bin/carddisj</a> |
| IGLL1    | Immunoglobulin Light Chain Protein Co              | 44 | GC22M023 | 11.25 | <a href="https://www.genecards.org/cgi-bin/carddisj">https://www.genecards.org/cgi-bin/carddisj</a> |
| BSCL2    | BSCL2 Lipin Protein Co                             | 43 | GC11M063 | 11.2  | <a href="https://www.genecards.org/cgi-bin/carddisj">https://www.genecards.org/cgi-bin/carddisj</a> |
| ITGAL    | Integrin Subunit Protein Co                        | 47 | GC16P030 | 11.18 | <a href="https://www.genecards.org/cgi-bin/carddisj">https://www.genecards.org/cgi-bin/carddisj</a> |
| TPI1     | Triose Phosphate Isomerase Protein Co              | 48 | GC12P006 | 11.14 | <a href="https://www.genecards.org/cgi-bin/carddisj">https://www.genecards.org/cgi-bin/carddisj</a> |
| LIG4     | DNA Ligase Protein Co                              | 50 | GC13M108 | 11.13 | <a href="https://www.genecards.org/cgi-bin/carddisj">https://www.genecards.org/cgi-bin/carddisj</a> |
| CXCL12   | C-X-C Motif Protein Co                             | 47 | GC10M044 | 11.13 | <a href="https://www.genecards.org/cgi-bin/carddisj">https://www.genecards.org/cgi-bin/carddisj</a> |
| CD14     | CD14 Molecule Protein Co                           | 46 | GC05M140 | 11.11 | <a href="https://www.genecards.org/cgi-bin/carddisj">https://www.genecards.org/cgi-bin/carddisj</a> |
| SETX     | Senataxin Protein Co                               | 41 | GC09M132 | 11.09 | <a href="https://www.genecards.org/cgi-bin/carddisj">https://www.genecards.org/cgi-bin/carddisj</a> |
| LRBA     | LPS Receptor Protein Co                            | 42 | GC04M150 | 11.09 | <a href="https://www.genecards.org/cgi-bin/carddisj">https://www.genecards.org/cgi-bin/carddisj</a> |
| NCF4-AS1 | NCF4 Antisense RNA Gene                            | 11 | GC22M036 | 11.02 | <a href="https://www.genecards.org/cgi-bin/carddisj">https://www.genecards.org/cgi-bin/carddisj</a> |
| LYN      | LYN Proto-oncogene Protein Co                      | 51 | GC08P055 | 10.98 | <a href="https://www.genecards.org/cgi-bin/carddisj">https://www.genecards.org/cgi-bin/carddisj</a> |
| CTSG     | Cathepsin G Protein Co                             | 46 | GC14M024 | 10.96 | <a href="https://www.genecards.org/cgi-bin/carddisj">https://www.genecards.org/cgi-bin/carddisj</a> |
| SFTPD    | Surfactant Protein Co                              | 45 | GC10M079 | 10.93 | <a href="https://www.genecards.org/cgi-bin/carddisj">https://www.genecards.org/cgi-bin/carddisj</a> |
| IL15     | Interleukin 15 Protein Co                          | 42 | GC04P141 | 10.79 | <a href="https://www.genecards.org/cgi-bin/carddisj">https://www.genecards.org/cgi-bin/carddisj</a> |
| PRDM16   | PR/SET Domain Protein Co                           | 46 | GC01P003 | 10.76 | <a href="https://www.genecards.org/cgi-bin/carddisj">https://www.genecards.org/cgi-bin/carddisj</a> |
| PRL      | Prolactin Protein Co                               | 44 | GC06M022 | 10.71 | <a href="https://www.genecards.org/cgi-bin/carddisj">https://www.genecards.org/cgi-bin/carddisj</a> |
| DEFB4A   | Defensin B Protein Co                              | 38 | GC08P007 | 10.65 | <a href="https://www.genecards.org/cgi-bin/carddisj">https://www.genecards.org/cgi-bin/carddisj</a> |
| MIRLET7D | MicroRNA RNA Gene                                  | 22 | GC09P094 | 10.64 | <a href="https://www.genecards.org/cgi-bin/carddisj">https://www.genecards.org/cgi-bin/carddisj</a> |
| IL1RAPL2 | Interleukin 1 Receptor Accessory Protein Co        | 38 | GC0XP104 | 10.63 | <a href="https://www.genecards.org/cgi-bin/carddisj">https://www.genecards.org/cgi-bin/carddisj</a> |
| BMPR2    | Bone Morphogenetic Protein Receptor Co             | 51 | GC02P202 | 10.61 | <a href="https://www.genecards.org/cgi-bin/carddisj">https://www.genecards.org/cgi-bin/carddisj</a> |
| PLCG2    | Phospholipase C Protein Co                         | 52 | GC16P081 | 10.59 | <a href="https://www.genecards.org/cgi-bin/carddisj">https://www.genecards.org/cgi-bin/carddisj</a> |
| S100A9   | S100 Calcium Binding Protein Co                    | 44 | GC01P153 | 10.56 | <a href="https://www.genecards.org/cgi-bin/carddisj">https://www.genecards.org/cgi-bin/carddisj</a> |
| SLC29A3  | Solute Carrier Family 29 Member 3 Protein Co       | 44 | GC10P071 | 10.56 | <a href="https://www.genecards.org/cgi-bin/carddisj">https://www.genecards.org/cgi-bin/carddisj</a> |
| DUOX1    | Dual Oxidase Protein Co                            | 42 | GC15P045 | 10.54 | <a href="https://www.genecards.org/cgi-bin/carddisj">https://www.genecards.org/cgi-bin/carddisj</a> |
| HMGB1    | High Mobility Group Protein Co                     | 45 | GC13M030 | 10.44 | <a href="https://www.genecards.org/cgi-bin/carddisj">https://www.genecards.org/cgi-bin/carddisj</a> |
| CXCL9    | C-X-C Motif Protein Co                             | 40 | GC04M076 | 10.42 | <a href="https://www.genecards.org/cgi-bin/carddisj">https://www.genecards.org/cgi-bin/carddisj</a> |
| ITGA4    | Integrin Subunit Protein Co                        | 50 | GC02P181 | 10.42 | <a href="https://www.genecards.org/cgi-bin/carddisj">https://www.genecards.org/cgi-bin/carddisj</a> |
| ELP1     | Elongator 1 Protein Co                             | 35 | GC09M108 | 10.4  | <a href="https://www.genecards.org/cgi-bin/carddisj">https://www.genecards.org/cgi-bin/carddisj</a> |
| SYK      | Spleen Tyrosine Kinase Protein Co                  | 51 | GC09P091 | 10.35 | <a href="https://www.genecards.org/cgi-bin/carddisj">https://www.genecards.org/cgi-bin/carddisj</a> |
| ANXA5    | Annexin A5 Protein Co                              | 48 | GC04M121 | 10.32 | <a href="https://www.genecards.org/cgi-bin/carddisj">https://www.genecards.org/cgi-bin/carddisj</a> |
| MMP8     | Matrix Metalloproteinase Co                        | 48 | GC11M102 | 10.27 | <a href="https://www.genecards.org/cgi-bin/carddisj">https://www.genecards.org/cgi-bin/carddisj</a> |
| CCK      | Cholecystic Protein Co                             | 42 | GC03M042 | 10.25 | <a href="https://www.genecards.org/cgi-bin/carddisj">https://www.genecards.org/cgi-bin/carddisj</a> |
| VWF      | Von Willebrand Protein Co                          | 50 | GC12M005 | 10.16 | <a href="https://www.genecards.org/cgi-bin/carddisj">https://www.genecards.org/cgi-bin/carddisj</a> |
| ITGB3    | Integrin Subunit Protein Co                        | 51 | GC17P047 | 10.14 | <a href="https://www.genecards.org/cgi-bin/carddisj">https://www.genecards.org/cgi-bin/carddisj</a> |
| NOX1     | NADPH Oxidase Protein Co                           | 43 | GC0XM100 | 10.14 | <a href="https://www.genecards.org/cgi-bin/carddisj">https://www.genecards.org/cgi-bin/carddisj</a> |
| CP       | Ceruloplasmin Protein Co                           | 49 | GC03M149 | 10.09 | <a href="https://www.genecards.org/cgi-bin/carddisj">https://www.genecards.org/cgi-bin/carddisj</a> |
| ABCC1    | ATP Binding Cassette Protein Co                    | 48 | GC16P015 | 10    | <a href="https://www.genecards.org/cgi-bin/carddisj">https://www.genecards.org/cgi-bin/carddisj</a> |
| MAPK14   | Mitogen-Activated Protein Kinase Co                | 53 | GC06P046 | 9.98  | <a href="https://www.genecards.org/cgi-bin/carddisj">https://www.genecards.org/cgi-bin/carddisj</a> |
| IDO1     | Indoleamine 2,3-Dioxygenase Protein Co             | 47 | GC08P039 | 9.94  | <a href="https://www.genecards.org/cgi-bin/carddisj">https://www.genecards.org/cgi-bin/carddisj</a> |
| HSPD1    | Heat Shock Protein 70 Protein Co                   | 49 | GC02M197 | 9.91  | <a href="https://www.genecards.org/cgi-bin/carddisj">https://www.genecards.org/cgi-bin/carddisj</a> |
| CYP1B1   | Cytochrome P450 Protein Co                         | 50 | GC02M038 | 9.89  | <a href="https://www.genecards.org/cgi-bin/carddisj">https://www.genecards.org/cgi-bin/carddisj</a> |
| EGFR     | Epidermal Growth Factor Receptor Protein Co        | 56 | GC07P055 | 9.89  | <a href="https://www.genecards.org/cgi-bin/carddisj">https://www.genecards.org/cgi-bin/carddisj</a> |

|           |                          |    |          |      |                                                                                                     |
|-----------|--------------------------|----|----------|------|-----------------------------------------------------------------------------------------------------|
| RASGRP1   | RAS GuanyProtein Co      | 47 | GC15M038 | 9.8  | <a href="https://www.genecards.org/cgi-bin/carddisj">https://www.genecards.org/cgi-bin/carddisj</a> |
| IFNB1     | Interferon Protein Co    | 43 | GC09M021 | 9.76 | <a href="https://www.genecards.org/cgi-bin/carddisj">https://www.genecards.org/cgi-bin/carddisj</a> |
| ATP6V1B1  | ATPase H+Protein Co      | 44 | GC02P070 | 9.76 | <a href="https://www.genecards.org/cgi-bin/carddisj">https://www.genecards.org/cgi-bin/carddisj</a> |
| LOC106021 | Williams-BB Biological I | 2  | GC07U904 | 9.69 | <a href="https://www.genecards.org/cgi-bin/carddisj">https://www.genecards.org/cgi-bin/carddisj</a> |
| BMP6      | Bone MorçProtein Co      | 45 | GC06P007 | 9.55 | <a href="https://www.genecards.org/cgi-bin/carddisj">https://www.genecards.org/cgi-bin/carddisj</a> |
| CHIT1     | Chitinase 1Protein Co    | 45 | GC01M203 | 9.4  | <a href="https://www.genecards.org/cgi-bin/carddisj">https://www.genecards.org/cgi-bin/carddisj</a> |
| SCARB2    | Scavenger Protein Co     | 45 | GC04M076 | 9.4  | <a href="https://www.genecards.org/cgi-bin/carddisj">https://www.genecards.org/cgi-bin/carddisj</a> |
| CXCR2     | C-X-C Mo Protein Co      | 50 | GC02P218 | 9.34 | <a href="https://www.genecards.org/cgi-bin/carddisj">https://www.genecards.org/cgi-bin/carddisj</a> |
| GALC      | GalactosylcProtein Co    | 44 | GC14M087 | 9.31 | <a href="https://www.genecards.org/cgi-bin/carddisj">https://www.genecards.org/cgi-bin/carddisj</a> |
| CCL4      | C-C Motif Protein Co     | 42 | GC17P036 | 9.31 | <a href="https://www.genecards.org/cgi-bin/carddisj">https://www.genecards.org/cgi-bin/carddisj</a> |
| SLC11A1   | Solute Cariprotein Co    | 48 | GC02P218 | 9.29 | <a href="https://www.genecards.org/cgi-bin/carddisj">https://www.genecards.org/cgi-bin/carddisj</a> |
| HBG2      | Hemoglob Protein Co      | 43 | GC11M005 | 9.27 | <a href="https://www.genecards.org/cgi-bin/carddisj">https://www.genecards.org/cgi-bin/carddisj</a> |
| UNG       | Uracil DNAProtein Co     | 48 | GC12P109 | 9.24 | <a href="https://www.genecards.org/cgi-bin/carddisj">https://www.genecards.org/cgi-bin/carddisj</a> |
| IL1R1     | Interleukin Protein Co   | 47 | GC02P102 | 9.16 | <a href="https://www.genecards.org/cgi-bin/carddisj">https://www.genecards.org/cgi-bin/carddisj</a> |
| PTK2B     | Protein TyrProtein Co    | 50 | GC08P027 | 9.12 | <a href="https://www.genecards.org/cgi-bin/carddisj">https://www.genecards.org/cgi-bin/carddisj</a> |
| CUBN      | Cubilin Protein Co       | 47 | GC10M016 | 9.1  | <a href="https://www.genecards.org/cgi-bin/carddisj">https://www.genecards.org/cgi-bin/carddisj</a> |
| FCGR3A    | Fc FragmeProtein Co      | 46 | GC01M161 | 9.06 | <a href="https://www.genecards.org/cgi-bin/carddisj">https://www.genecards.org/cgi-bin/carddisj</a> |
| PGK1      | PhosphoglProtein Co      | 50 | GC0XP077 | 9.05 | <a href="https://www.genecards.org/cgi-bin/carddisj">https://www.genecards.org/cgi-bin/carddisj</a> |
| TLR1      | Toll Like RProtein Co    | 49 | GC04M038 | 8.99 | <a href="https://www.genecards.org/cgi-bin/carddisj">https://www.genecards.org/cgi-bin/carddisj</a> |
| ATP7B     | ATPase CoProtein Co      | 48 | GC13M051 | 8.97 | <a href="https://www.genecards.org/cgi-bin/carddisj">https://www.genecards.org/cgi-bin/carddisj</a> |
| ALG3      | ALG3 Alph Protein Co     | 43 | GC03M184 | 8.91 | <a href="https://www.genecards.org/cgi-bin/carddisj">https://www.genecards.org/cgi-bin/carddisj</a> |
| IKBK      | Inhibitor OProtein Co    | 50 | GC0XP154 | 8.9  | <a href="https://www.genecards.org/cgi-bin/carddisj">https://www.genecards.org/cgi-bin/carddisj</a> |
| NAGLU     | N-Acetyl-/Protein Co     | 44 | GC17P042 | 8.82 | <a href="https://www.genecards.org/cgi-bin/carddisj">https://www.genecards.org/cgi-bin/carddisj</a> |
| AICDA     | Activation Protein Co    | 47 | GC12M008 | 8.82 | <a href="https://www.genecards.org/cgi-bin/carddisj">https://www.genecards.org/cgi-bin/carddisj</a> |
| GAST      | Gastrin Protein Co       | 41 | GC17P041 | 8.66 | <a href="https://www.genecards.org/cgi-bin/carddisj">https://www.genecards.org/cgi-bin/carddisj</a> |
| CD27      | CD27 MoleProtein Co      | 47 | GC12P006 | 8.62 | <a href="https://www.genecards.org/cgi-bin/carddisj">https://www.genecards.org/cgi-bin/carddisj</a> |
| GAN       | Gigaxonin Protein Co     | 40 | GC16P081 | 8.6  | <a href="https://www.genecards.org/cgi-bin/carddisj">https://www.genecards.org/cgi-bin/carddisj</a> |
| PPP3CA    | Protein PhProtein Co     | 54 | GC04M101 | 8.59 | <a href="https://www.genecards.org/cgi-bin/carddisj">https://www.genecards.org/cgi-bin/carddisj</a> |
| PLAT      | PlasminogProtein Co      | 51 | GC08M042 | 8.56 | <a href="https://www.genecards.org/cgi-bin/carddisj">https://www.genecards.org/cgi-bin/carddisj</a> |
| CR1       | ComplemeProtein Co       | 45 | GC01P207 | 8.53 | <a href="https://www.genecards.org/cgi-bin/carddisj">https://www.genecards.org/cgi-bin/carddisj</a> |
| PMM2      | PhosphomProtein Co       | 48 | GC16P008 | 8.53 | <a href="https://www.genecards.org/cgi-bin/carddisj">https://www.genecards.org/cgi-bin/carddisj</a> |
| SLC12A6   | Solute Cariprotein Co    | 50 | GC15M034 | 8.51 | <a href="https://www.genecards.org/cgi-bin/carddisj">https://www.genecards.org/cgi-bin/carddisj</a> |
| LITAF     | LipopolysaProtein Co     | 45 | GC16M011 | 8.47 | <a href="https://www.genecards.org/cgi-bin/carddisj">https://www.genecards.org/cgi-bin/carddisj</a> |
| KEL       | Kell MetallProtein Co    | 43 | GC07M142 | 8.42 | <a href="https://www.genecards.org/cgi-bin/carddisj">https://www.genecards.org/cgi-bin/carddisj</a> |
| PDGFB     | Platelet DeProtein Co    | 51 | GC22M044 | 8.37 | <a href="https://www.genecards.org/cgi-bin/carddisj">https://www.genecards.org/cgi-bin/carddisj</a> |
| GABBR2    | Gamma-A Protein Co       | 48 | GC09M098 | 8.34 | <a href="https://www.genecards.org/cgi-bin/carddisj">https://www.genecards.org/cgi-bin/carddisj</a> |
| IGH       | ImmunoglProtein Co       | 16 | GC14M105 | 8.32 | <a href="https://www.genecards.org/cgi-bin/carddisj">https://www.genecards.org/cgi-bin/carddisj</a> |
| SPTLC3    | Serine PalrProtein Co    | 41 | GC20P013 | 8.32 | <a href="https://www.genecards.org/cgi-bin/carddisj">https://www.genecards.org/cgi-bin/carddisj</a> |
| RAG1      | RecombinProtein Co       | 47 | GC11P036 | 8.31 | <a href="https://www.genecards.org/cgi-bin/carddisj">https://www.genecards.org/cgi-bin/carddisj</a> |
| PMP2      | Peripheral Protein Co    | 44 | GC08M081 | 8.27 | <a href="https://www.genecards.org/cgi-bin/carddisj">https://www.genecards.org/cgi-bin/carddisj</a> |
| RAC1      | Rac Family Protein Co    | 51 | GC07P006 | 8.25 | <a href="https://www.genecards.org/cgi-bin/carddisj">https://www.genecards.org/cgi-bin/carddisj</a> |
| IL6R      | Interleukin Protein Co   | 50 | GC01P154 | 8.23 | <a href="https://www.genecards.org/cgi-bin/carddisj">https://www.genecards.org/cgi-bin/carddisj</a> |
| LPA       | LipoproteinProtein Co    | 41 | GC06M160 | 8.22 | <a href="https://www.genecards.org/cgi-bin/carddisj">https://www.genecards.org/cgi-bin/carddisj</a> |
| IL23A     | Interleukin Protein Co   | 41 | GC12P056 | 8.2  | <a href="https://www.genecards.org/cgi-bin/carddisj">https://www.genecards.org/cgi-bin/carddisj</a> |
| SLCO2A1   | Solute Cariprotein Co    | 44 | GC03M133 | 8.12 | <a href="https://www.genecards.org/cgi-bin/carddisj">https://www.genecards.org/cgi-bin/carddisj</a> |
| SIGLEC5   | Sialic Acid Protein Co   | 39 | GC19M051 | 8.1  | <a href="https://www.genecards.org/cgi-bin/carddisj">https://www.genecards.org/cgi-bin/carddisj</a> |
| SNX10     | Sorting NeProtein Co     | 40 | GC07P026 | 8.09 | <a href="https://www.genecards.org/cgi-bin/carddisj">https://www.genecards.org/cgi-bin/carddisj</a> |
| HABP2     | HyaluronaiProtein Co     | 44 | GC10P113 | 8.06 | <a href="https://www.genecards.org/cgi-bin/carddisj">https://www.genecards.org/cgi-bin/carddisj</a> |
| SLC2A10   | Solute Cariprotein Co    | 45 | GC20P046 | 8.06 | <a href="https://www.genecards.org/cgi-bin/carddisj">https://www.genecards.org/cgi-bin/carddisj</a> |
| SDSL      | Serine DehProtein Co     | 40 | GC12P113 | 8.05 | <a href="https://www.genecards.org/cgi-bin/carddisj">https://www.genecards.org/cgi-bin/carddisj</a> |
| GH1       | Growth HcProtein Co      | 46 | GC17M063 | 8.04 | <a href="https://www.genecards.org/cgi-bin/carddisj">https://www.genecards.org/cgi-bin/carddisj</a> |
| TLR10     | Toll Like RProtein Co    | 42 | GC04M038 | 7.98 | <a href="https://www.genecards.org/cgi-bin/carddisj">https://www.genecards.org/cgi-bin/carddisj</a> |
| AP1S3     | Adaptor RProtein Co      | 41 | GC02M223 | 7.96 | <a href="https://www.genecards.org/cgi-bin/carddisj">https://www.genecards.org/cgi-bin/carddisj</a> |
| DBH       | Dopamine Protein Co      | 51 | GC09P133 | 7.96 | <a href="https://www.genecards.org/cgi-bin/carddisj">https://www.genecards.org/cgi-bin/carddisj</a> |
| ALK       | ALK Recep Protein Co     | 52 | GC02M029 | 7.93 | <a href="https://www.genecards.org/cgi-bin/carddisj">https://www.genecards.org/cgi-bin/carddisj</a> |
| GSR       | Glutathion Protein Co    | 50 | GC08M030 | 7.82 | <a href="https://www.genecards.org/cgi-bin/carddisj">https://www.genecards.org/cgi-bin/carddisj</a> |
| GPXMB     | GlycoproteProtein Co     | 45 | GC07P023 | 7.8  | <a href="https://www.genecards.org/cgi-bin/carddisj">https://www.genecards.org/cgi-bin/carddisj</a> |
| F5        | CoagulatioProtein Co     | 46 | GC01M169 | 7.77 | <a href="https://www.genecards.org/cgi-bin/carddisj">https://www.genecards.org/cgi-bin/carddisj</a> |

|         |                        |              |                                                                                                          |
|---------|------------------------|--------------|----------------------------------------------------------------------------------------------------------|
| FGD4    | FYVE, Rho(Protein Co   | 43 GC12P032. | 7.71 <a href="https://www.genecards.org/cgi-bin/carddisj">https://www.genecards.org/cgi-bin/carddisj</a> |
| OSTM1   | Osteoclast Protein Co  | 39 GC06M108  | 7.67 <a href="https://www.genecards.org/cgi-bin/carddisj">https://www.genecards.org/cgi-bin/carddisj</a> |
| KRTCAP2 | Keratinocy Protein Co  | 34 GC01M155  | 7.66 <a href="https://www.genecards.org/cgi-bin/carddisj">https://www.genecards.org/cgi-bin/carddisj</a> |
| TPO     | Thyroid Pe Protein Co  | 49 GC02P001. | 7.63 <a href="https://www.genecards.org/cgi-bin/carddisj">https://www.genecards.org/cgi-bin/carddisj</a> |
| CTEPH1  | Pulmonary Genetic Lo   | 2 GC06U901   | 7.62 <a href="https://www.genecards.org/cgi-bin/carddisj">https://www.genecards.org/cgi-bin/carddisj</a> |
| CFP     | Compleme Protein Co    | 45 GC0XM047  | 7.58 <a href="https://www.genecards.org/cgi-bin/carddisj">https://www.genecards.org/cgi-bin/carddisj</a> |
| CALCR   | Calcitonin Protein Co  | 48 GC07M093  | 7.58 <a href="https://www.genecards.org/cgi-bin/carddisj">https://www.genecards.org/cgi-bin/carddisj</a> |
| F3      | Coagulatio Protein Co  | 47 GC01M094  | 7.57 <a href="https://www.genecards.org/cgi-bin/carddisj">https://www.genecards.org/cgi-bin/carddisj</a> |
| OTC     | Ornithine (Protein Co  | 48 GC0XP038  | 7.56 <a href="https://www.genecards.org/cgi-bin/carddisj">https://www.genecards.org/cgi-bin/carddisj</a> |
| ITGAE   | Integrin Su Protein Co | 41 GC17M003  | 7.54 <a href="https://www.genecards.org/cgi-bin/carddisj">https://www.genecards.org/cgi-bin/carddisj</a> |
| DNAJB11 | DnaJ Heat Protein Co   | 41 GC03P186  | 7.48 <a href="https://www.genecards.org/cgi-bin/carddisj">https://www.genecards.org/cgi-bin/carddisj</a> |
| CORO1A  | Coronin 1/Protein Co   | 44 GC16P030  | 7.42 <a href="https://www.genecards.org/cgi-bin/carddisj">https://www.genecards.org/cgi-bin/carddisj</a> |
| CSF1R   | Colony Stir Protein Co | 53 GC05M150  | 7.39 <a href="https://www.genecards.org/cgi-bin/carddisj">https://www.genecards.org/cgi-bin/carddisj</a> |
| LMO2    | LIM Domai Protein Co   | 43 GC11M033  | 7.37 <a href="https://www.genecards.org/cgi-bin/carddisj">https://www.genecards.org/cgi-bin/carddisj</a> |
| LCAT    | Lecithin-Cl Protein Co | 48 GC16M067  | 7.36 <a href="https://www.genecards.org/cgi-bin/carddisj">https://www.genecards.org/cgi-bin/carddisj</a> |
| MIR30A  | MicroRNA RNA Gene      | 20 GC06M071  | 7.35 <a href="https://www.genecards.org/cgi-bin/carddisj">https://www.genecards.org/cgi-bin/carddisj</a> |
| CA2     | Carbonic A Protein Co  | 53 GC08P085  | 7.28 <a href="https://www.genecards.org/cgi-bin/carddisj">https://www.genecards.org/cgi-bin/carddisj</a> |
| NCF1C   | Neutrophil Pseudoger   | 22 GC07M075  | 7.27 <a href="https://www.genecards.org/cgi-bin/carddisj">https://www.genecards.org/cgi-bin/carddisj</a> |
| CPLANE2 | Ciliogenesi Protein Co | 25 GC01M016  | 7.25 <a href="https://www.genecards.org/cgi-bin/carddisj">https://www.genecards.org/cgi-bin/carddisj</a> |
| ENTPD1  | Ectonuclec Protein Co  | 48 GC10P095  | 7.22 <a href="https://www.genecards.org/cgi-bin/carddisj">https://www.genecards.org/cgi-bin/carddisj</a> |
| IL12B   | Interleukin Protein Co | 45 GC05M159  | 7.18 <a href="https://www.genecards.org/cgi-bin/carddisj">https://www.genecards.org/cgi-bin/carddisj</a> |
| KNG1    | Kininogen Protein Co   | 45 GC03P186  | 7.13 <a href="https://www.genecards.org/cgi-bin/carddisj">https://www.genecards.org/cgi-bin/carddisj</a> |
| RAP1A   | RAP1A, Me Protein Co   | 48 GC01P111  | 7.11 <a href="https://www.genecards.org/cgi-bin/carddisj">https://www.genecards.org/cgi-bin/carddisj</a> |
| DNM2    | Dynamin 2 Protein Co   | 51 GC19P010  | 7.09 <a href="https://www.genecards.org/cgi-bin/carddisj">https://www.genecards.org/cgi-bin/carddisj</a> |
| CXCL2   | C-X-C Mo Protein Co    | 42 GC04M074  | 7.04 <a href="https://www.genecards.org/cgi-bin/carddisj">https://www.genecards.org/cgi-bin/carddisj</a> |
| LAG3    | Lymphocy Protein Co    | 39 GC12P006  | 6.98 <a href="https://www.genecards.org/cgi-bin/carddisj">https://www.genecards.org/cgi-bin/carddisj</a> |
| HRH2    | Histamine Protein Co   | 45 GC05P175  | 6.96 <a href="https://www.genecards.org/cgi-bin/carddisj">https://www.genecards.org/cgi-bin/carddisj</a> |
| CD163   | CD163 Mo Protein Co    | 44 GC12M007  | 6.96 <a href="https://www.genecards.org/cgi-bin/carddisj">https://www.genecards.org/cgi-bin/carddisj</a> |
| TOP1    | DNA Topo Protein Co    | 48 GC20P041  | 6.92 <a href="https://www.genecards.org/cgi-bin/carddisj">https://www.genecards.org/cgi-bin/carddisj</a> |
| ERCC6   | ERCC Excis Protein Co  | 46 GC10M049  | 6.91 <a href="https://www.genecards.org/cgi-bin/carddisj">https://www.genecards.org/cgi-bin/carddisj</a> |
| CYP17A1 | Cytochromr Protein Co  | 50 GC10M102  | 6.9 <a href="https://www.genecards.org/cgi-bin/carddisj">https://www.genecards.org/cgi-bin/carddisj</a>  |
| RTN4    | Reticulon 4 Protein Co | 46 GC02M054  | 6.89 <a href="https://www.genecards.org/cgi-bin/carddisj">https://www.genecards.org/cgi-bin/carddisj</a> |
| NOX4    | NADPH O> Protein Co    | 44 GC11M089  | 6.86 <a href="https://www.genecards.org/cgi-bin/carddisj">https://www.genecards.org/cgi-bin/carddisj</a> |
| MMP13   | Matrix Met Protein Co  | 51 GC11M102  | 6.84 <a href="https://www.genecards.org/cgi-bin/carddisj">https://www.genecards.org/cgi-bin/carddisj</a> |
| NGFR    | Nerve Grov Protein Co  | 47 GC17P049  | 6.81 <a href="https://www.genecards.org/cgi-bin/carddisj">https://www.genecards.org/cgi-bin/carddisj</a> |
| DEFB1   | Defensin B Protein Co  | 41 GC08M006  | 6.8 <a href="https://www.genecards.org/cgi-bin/carddisj">https://www.genecards.org/cgi-bin/carddisj</a>  |
| CXCR1   | C-X-C Mo Protein Co    | 44 GC02M218  | 6.76 <a href="https://www.genecards.org/cgi-bin/carddisj">https://www.genecards.org/cgi-bin/carddisj</a> |
| NTRK2   | Neurotrop Protein Co   | 55 GC09P084  | 6.7 <a href="https://www.genecards.org/cgi-bin/carddisj">https://www.genecards.org/cgi-bin/carddisj</a>  |
| SPTSSB  | Serine Palr Protein Co | 33 GC03M161  | 6.69 <a href="https://www.genecards.org/cgi-bin/carddisj">https://www.genecards.org/cgi-bin/carddisj</a> |
| BAMBI   | BMP And /Protein Co    | 44 GC10P028  | 6.68 <a href="https://www.genecards.org/cgi-bin/carddisj">https://www.genecards.org/cgi-bin/carddisj</a> |
| MIR19B1 | MicroRNA RNA Gene      | 18 GC13P091  | 6.66 <a href="https://www.genecards.org/cgi-bin/carddisj">https://www.genecards.org/cgi-bin/carddisj</a> |
| PLEK    | Pleckstrin Protein Co  | 41 GC02P068  | 6.64 <a href="https://www.genecards.org/cgi-bin/carddisj">https://www.genecards.org/cgi-bin/carddisj</a> |
| GPX1    | Glutathion Protein Co  | 49 GC03M049  | 6.62 <a href="https://www.genecards.org/cgi-bin/carddisj">https://www.genecards.org/cgi-bin/carddisj</a> |
| STX11   | Syntaxin 1: Protein Co | 41 GC06P144  | 6.52 <a href="https://www.genecards.org/cgi-bin/carddisj">https://www.genecards.org/cgi-bin/carddisj</a> |
| BPI     | Bactericida Protein Co | 43 GC20P038  | 6.51 <a href="https://www.genecards.org/cgi-bin/carddisj">https://www.genecards.org/cgi-bin/carddisj</a> |
| PLAUR   | Plasminog Protein Co   | 46 GC19M043  | 6.51 <a href="https://www.genecards.org/cgi-bin/carddisj">https://www.genecards.org/cgi-bin/carddisj</a> |
| CCL18   | C-C Motif Protein Co   | 38 GC17P036  | 6.5 <a href="https://www.genecards.org/cgi-bin/carddisj">https://www.genecards.org/cgi-bin/carddisj</a>  |
| KRT8    | Keratin 8 Protein Co   | 48 GC12M052  | 6.49 <a href="https://www.genecards.org/cgi-bin/carddisj">https://www.genecards.org/cgi-bin/carddisj</a> |
| C4B     | Compleme Protein Co    | 42 GC06P032  | 6.44 <a href="https://www.genecards.org/cgi-bin/carddisj">https://www.genecards.org/cgi-bin/carddisj</a> |
| NOX5    | NADPH O> Protein Co    | 39 GC15P071  | 6.41 <a href="https://www.genecards.org/cgi-bin/carddisj">https://www.genecards.org/cgi-bin/carddisj</a> |
| NCF1B   | Neutrophil Pseudoger   | 21 GC07P073  | 6.41 <a href="https://www.genecards.org/cgi-bin/carddisj">https://www.genecards.org/cgi-bin/carddisj</a> |
| CTSB    | Cathepsin Protein Co   | 52 GC08M011  | 6.4 <a href="https://www.genecards.org/cgi-bin/carddisj">https://www.genecards.org/cgi-bin/carddisj</a>  |
| TPT1    | Tumor Pro Protein Co   | 48 GC13M045  | 6.39 <a href="https://www.genecards.org/cgi-bin/carddisj">https://www.genecards.org/cgi-bin/carddisj</a> |
| COG7    | Componer Protein Co    | 40 GC16M023  | 6.38 <a href="https://www.genecards.org/cgi-bin/carddisj">https://www.genecards.org/cgi-bin/carddisj</a> |
| CTDSPL  | CTD Small Protein Co   | 40 GC03P037  | 6.35 <a href="https://www.genecards.org/cgi-bin/carddisj">https://www.genecards.org/cgi-bin/carddisj</a> |
| IDNK    | IDNK Glucr Protein Co  | 35 GC09P083  | 6.35 <a href="https://www.genecards.org/cgi-bin/carddisj">https://www.genecards.org/cgi-bin/carddisj</a> |
| SPTSSA  | Serine Palr Protein Co | 33 GC14M034  | 6.34 <a href="https://www.genecards.org/cgi-bin/carddisj">https://www.genecards.org/cgi-bin/carddisj</a> |
| MLN     | Motilin Protein Co     | 36 GC06M033  | 6.34 <a href="https://www.genecards.org/cgi-bin/carddisj">https://www.genecards.org/cgi-bin/carddisj</a> |



|          |                        |    |          |      |                                                                                                     |
|----------|------------------------|----|----------|------|-----------------------------------------------------------------------------------------------------|
| SPARC    | Secreted P Protein Co  | 52 | GC05M151 | 6.33 | <a href="https://www.genecards.org/cgi-bin/carddisj">https://www.genecards.org/cgi-bin/carddisj</a> |
| ADCYAP1  | Adenylate Protein Co   | 42 | GC18P000 | 6.3  | <a href="https://www.genecards.org/cgi-bin/carddisj">https://www.genecards.org/cgi-bin/carddisj</a> |
| SMPD1    | Sphingomy Protein Co   | 49 | GC11P006 | 6.28 | <a href="https://www.genecards.org/cgi-bin/carddisj">https://www.genecards.org/cgi-bin/carddisj</a> |
| SH2D1A   | SH2 Doma Protein Co    | 47 | GC0XP124 | 6.27 | <a href="https://www.genecards.org/cgi-bin/carddisj">https://www.genecards.org/cgi-bin/carddisj</a> |
| DECR1    | 2,4-Dienoy Protein Co  | 42 | GC08P090 | 6.27 | <a href="https://www.genecards.org/cgi-bin/carddisj">https://www.genecards.org/cgi-bin/carddisj</a> |
| HBA1     | Hemoglob Protein Co    | 43 | GC16P001 | 6.26 | <a href="https://www.genecards.org/cgi-bin/carddisj">https://www.genecards.org/cgi-bin/carddisj</a> |
| CLEC11A  | C-Type Lei Protein Co  | 40 | GC19P050 | 6.25 | <a href="https://www.genecards.org/cgi-bin/carddisj">https://www.genecards.org/cgi-bin/carddisj</a> |
| RAB5A    | RAB5A, Me Protein Co   | 47 | GC03P019 | 6.18 | <a href="https://www.genecards.org/cgi-bin/carddisj">https://www.genecards.org/cgi-bin/carddisj</a> |
| MVK      | Mevalonat Protein Co   | 50 | GC12P109 | 6.16 | <a href="https://www.genecards.org/cgi-bin/carddisj">https://www.genecards.org/cgi-bin/carddisj</a> |
| CYP19A1  | Cytochrom Protein Co   | 50 | GC15M051 | 6.16 | <a href="https://www.genecards.org/cgi-bin/carddisj">https://www.genecards.org/cgi-bin/carddisj</a> |
| STT3B    | STT3 Oligc Protein Co  | 45 | GC03P031 | 6.16 | <a href="https://www.genecards.org/cgi-bin/carddisj">https://www.genecards.org/cgi-bin/carddisj</a> |
| SP1      | Sp1 Transc Protein Co  | 45 | GC12P053 | 6.15 | <a href="https://www.genecards.org/cgi-bin/carddisj">https://www.genecards.org/cgi-bin/carddisj</a> |
| CLTCL1   | Clathrin He Protein Co | 41 | GC22M019 | 6.13 | <a href="https://www.genecards.org/cgi-bin/carddisj">https://www.genecards.org/cgi-bin/carddisj</a> |
| GPX2     | Glutathion Protein Co  | 45 | GC14M064 | 6.12 | <a href="https://www.genecards.org/cgi-bin/carddisj">https://www.genecards.org/cgi-bin/carddisj</a> |
| HSN1B    | Hereditary Genetic Lo  | 3  | GC03U900 | 6.09 | <a href="https://www.genecards.org/cgi-bin/carddisj">https://www.genecards.org/cgi-bin/carddisj</a> |
| HTATIP2  | HIV-1 Tat I Protein Co | 41 | GC11P020 | 6.06 | <a href="https://www.genecards.org/cgi-bin/carddisj">https://www.genecards.org/cgi-bin/carddisj</a> |
| ALPI     | Alkaline Ph Protein Co | 44 | GC02P232 | 6.04 | <a href="https://www.genecards.org/cgi-bin/carddisj">https://www.genecards.org/cgi-bin/carddisj</a> |
| CYP3A4   | Cytochrom Protein Co   | 51 | GC07M099 | 6.04 | <a href="https://www.genecards.org/cgi-bin/carddisj">https://www.genecards.org/cgi-bin/carddisj</a> |
| ITK      | IL2 Inducib Protein Co | 53 | GC05P157 | 6.02 | <a href="https://www.genecards.org/cgi-bin/carddisj">https://www.genecards.org/cgi-bin/carddisj</a> |
| KCNJ1    | Potassium Protein Co   | 48 | GC11M128 | 6.02 | <a href="https://www.genecards.org/cgi-bin/carddisj">https://www.genecards.org/cgi-bin/carddisj</a> |
| CSN1S1   | Casein Alp Protein Co  | 34 | GC04P069 | 6.01 | <a href="https://www.genecards.org/cgi-bin/carddisj">https://www.genecards.org/cgi-bin/carddisj</a> |
| CLEC6A   | C-Type Lei Protein Co  | 38 | GC12P008 | 6.01 | <a href="https://www.genecards.org/cgi-bin/carddisj">https://www.genecards.org/cgi-bin/carddisj</a> |
| HBA2     | Hemoglob Protein Co    | 43 | GC16P001 | 6.01 | <a href="https://www.genecards.org/cgi-bin/carddisj">https://www.genecards.org/cgi-bin/carddisj</a> |
| GABBR1   | Gamma-A Protein Co     | 48 | GC06M029 | 5.95 | <a href="https://www.genecards.org/cgi-bin/carddisj">https://www.genecards.org/cgi-bin/carddisj</a> |
| MRC1     | Mannose F Protein Co   | 40 | GC10P017 | 5.94 | <a href="https://www.genecards.org/cgi-bin/carddisj">https://www.genecards.org/cgi-bin/carddisj</a> |
| RPN2     | Ribophorir Protein Co  | 43 | GC20P037 | 5.93 | <a href="https://www.genecards.org/cgi-bin/carddisj">https://www.genecards.org/cgi-bin/carddisj</a> |
| RAB7B    | RAB7B, Me Protein Co   | 31 | GC01M205 | 5.93 | <a href="https://www.genecards.org/cgi-bin/carddisj">https://www.genecards.org/cgi-bin/carddisj</a> |
| LIG3     | DNA Ligas Protein Co   | 45 | GC17P034 | 5.92 | <a href="https://www.genecards.org/cgi-bin/carddisj">https://www.genecards.org/cgi-bin/carddisj</a> |
| LRP2     | LDL Recep Protein Co   | 47 | GC02M169 | 5.92 | <a href="https://www.genecards.org/cgi-bin/carddisj">https://www.genecards.org/cgi-bin/carddisj</a> |
| ETS1     | ETS Proto-Protein Co   | 51 | GC11M128 | 5.91 | <a href="https://www.genecards.org/cgi-bin/carddisj">https://www.genecards.org/cgi-bin/carddisj</a> |
| REG1A    | Regenerati Protein Co  | 43 | GC02P079 | 5.9  | <a href="https://www.genecards.org/cgi-bin/carddisj">https://www.genecards.org/cgi-bin/carddisj</a> |
| RPN1     | Ribophorir Protein Co  | 43 | GC03M128 | 5.82 | <a href="https://www.genecards.org/cgi-bin/carddisj">https://www.genecards.org/cgi-bin/carddisj</a> |
| CTSD     | Cathepsin Protein Co   | 54 | GC11M001 | 5.81 | <a href="https://www.genecards.org/cgi-bin/carddisj">https://www.genecards.org/cgi-bin/carddisj</a> |
| MTMR2    | Myotubula Protein Co   | 44 | GC11M095 | 5.81 | <a href="https://www.genecards.org/cgi-bin/carddisj">https://www.genecards.org/cgi-bin/carddisj</a> |
| MITF     | Melanocyt Protein Co   | 48 | GC03P069 | 5.79 | <a href="https://www.genecards.org/cgi-bin/carddisj">https://www.genecards.org/cgi-bin/carddisj</a> |
| STT3A    | STT3 Oligc Protein Co  | 45 | GC11P125 | 5.76 | <a href="https://www.genecards.org/cgi-bin/carddisj">https://www.genecards.org/cgi-bin/carddisj</a> |
| FANCF    | FA Comple Protein Co   | 43 | GC11M022 | 5.76 | <a href="https://www.genecards.org/cgi-bin/carddisj">https://www.genecards.org/cgi-bin/carddisj</a> |
| TRAF6    | TNF Recep Protein Co   | 48 | GC11M036 | 5.74 | <a href="https://www.genecards.org/cgi-bin/carddisj">https://www.genecards.org/cgi-bin/carddisj</a> |
| ITM2B    | Integral M Protein Co  | 44 | GC13P048 | 5.73 | <a href="https://www.genecards.org/cgi-bin/carddisj">https://www.genecards.org/cgi-bin/carddisj</a> |
| ENPP6    | Ectonuclec Protein Co  | 38 | GC04M184 | 5.72 | <a href="https://www.genecards.org/cgi-bin/carddisj">https://www.genecards.org/cgi-bin/carddisj</a> |
| DNAJB5   | DnaJ Heat Protein Co   | 38 | GC09P034 | 5.72 | <a href="https://www.genecards.org/cgi-bin/carddisj">https://www.genecards.org/cgi-bin/carddisj</a> |
| BCL11A   | BAF Chron Protein Co   | 44 | GC02M060 | 5.7  | <a href="https://www.genecards.org/cgi-bin/carddisj">https://www.genecards.org/cgi-bin/carddisj</a> |
| GRN      | Granulin P Protein Co  | 48 | GC17P044 | 5.64 | <a href="https://www.genecards.org/cgi-bin/carddisj">https://www.genecards.org/cgi-bin/carddisj</a> |
| PMM1     | Phosphom Protein Co    | 41 | GC22M041 | 5.63 | <a href="https://www.genecards.org/cgi-bin/carddisj">https://www.genecards.org/cgi-bin/carddisj</a> |
| HPSE2    | Heparanas Protein Co   | 41 | GC10M098 | 5.57 | <a href="https://www.genecards.org/cgi-bin/carddisj">https://www.genecards.org/cgi-bin/carddisj</a> |
| SLC17A6  | Solute Car Protein Co  | 41 | GC11P022 | 5.56 | <a href="https://www.genecards.org/cgi-bin/carddisj">https://www.genecards.org/cgi-bin/carddisj</a> |
| CD1A     | CD1a Mole Protein Co   | 43 | GC01P158 | 5.55 | <a href="https://www.genecards.org/cgi-bin/carddisj">https://www.genecards.org/cgi-bin/carddisj</a> |
| PPP1R12C | Protein Ph Protein Co  | 37 | GC19M055 | 5.53 | <a href="https://www.genecards.org/cgi-bin/carddisj">https://www.genecards.org/cgi-bin/carddisj</a> |
| RILP     | Rab Inter Protein Co   | 37 | GC17M001 | 5.5  | <a href="https://www.genecards.org/cgi-bin/carddisj">https://www.genecards.org/cgi-bin/carddisj</a> |
| IRAK3    | Interleukin Protein Co | 50 | GC12P066 | 5.49 | <a href="https://www.genecards.org/cgi-bin/carddisj">https://www.genecards.org/cgi-bin/carddisj</a> |
| CDKAL1   | CDK5 Regul Protein Co  | 39 | GC06P020 | 5.47 | <a href="https://www.genecards.org/cgi-bin/carddisj">https://www.genecards.org/cgi-bin/carddisj</a> |
| CHKB     | Choline Kir Protein Co | 47 | GC22M050 | 5.42 | <a href="https://www.genecards.org/cgi-bin/carddisj">https://www.genecards.org/cgi-bin/carddisj</a> |
| ABCC4    | ATP Bindin Protein Co  | 47 | GC13M095 | 5.41 | <a href="https://www.genecards.org/cgi-bin/carddisj">https://www.genecards.org/cgi-bin/carddisj</a> |
| MASP2    | Mannan Bi Protein Co   | 45 | GC01M011 | 5.4  | <a href="https://www.genecards.org/cgi-bin/carddisj">https://www.genecards.org/cgi-bin/carddisj</a> |
| DDOST    | Dolichyl-D Protein Co  | 45 | GC01M020 | 5.4  | <a href="https://www.genecards.org/cgi-bin/carddisj">https://www.genecards.org/cgi-bin/carddisj</a> |
| TNFRSF18 | TNF Recep Protein Co   | 44 | GC01M001 | 5.4  | <a href="https://www.genecards.org/cgi-bin/carddisj">https://www.genecards.org/cgi-bin/carddisj</a> |
| CENPB    | Centromer Protein Co   | 39 | GC20M003 | 5.37 | <a href="https://www.genecards.org/cgi-bin/carddisj">https://www.genecards.org/cgi-bin/carddisj</a> |
| CHIA     | Chitinase A Protein Co | 41 | GC01P111 | 5.36 | <a href="https://www.genecards.org/cgi-bin/carddisj">https://www.genecards.org/cgi-bin/carddisj</a> |



|          |                         |    |            |      |                                                                                                     |
|----------|-------------------------|----|------------|------|-----------------------------------------------------------------------------------------------------|
| LAMP1    | Lysosomal Protein Co    | 44 | GC13P113:  | 5.35 | <a href="https://www.genecards.org/cgi-bin/carddisj">https://www.genecards.org/cgi-bin/carddisj</a> |
| SLC7A8   | Solute CarriProtein Co  | 42 | GC14M023:  | 5.31 | <a href="https://www.genecards.org/cgi-bin/carddisj">https://www.genecards.org/cgi-bin/carddisj</a> |
| ALG6     | ALG6 AlphProtein Co     | 43 | GC01P063:  | 5.3  | <a href="https://www.genecards.org/cgi-bin/carddisj">https://www.genecards.org/cgi-bin/carddisj</a> |
| NFATC1   | Nuclear FaProtein Co    | 49 | GC18P079:  | 5.3  | <a href="https://www.genecards.org/cgi-bin/carddisj">https://www.genecards.org/cgi-bin/carddisj</a> |
| CLEC4E   | C-Type LeiProtein Co    | 39 | GC12M008:  | 5.26 | <a href="https://www.genecards.org/cgi-bin/carddisj">https://www.genecards.org/cgi-bin/carddisj</a> |
| PRH1     | Proline RicProtein Co   | 34 | GC12M010:  | 5.23 | <a href="https://www.genecards.org/cgi-bin/carddisj">https://www.genecards.org/cgi-bin/carddisj</a> |
| PRH2     | Proline RicProtein Co   | 32 | GC12P010:  | 5.23 | <a href="https://www.genecards.org/cgi-bin/carddisj">https://www.genecards.org/cgi-bin/carddisj</a> |
| DEFA5    | Defensin AProtein Co    | 39 | GC08M007:  | 5.22 | <a href="https://www.genecards.org/cgi-bin/carddisj">https://www.genecards.org/cgi-bin/carddisj</a> |
| UGCG     | UDP-GlucProtein Co      | 43 | GC09P111:  | 5.22 | <a href="https://www.genecards.org/cgi-bin/carddisj">https://www.genecards.org/cgi-bin/carddisj</a> |
| NELL1    | Neural EGFProtein Co    | 40 | GC11P020:  | 5.21 | <a href="https://www.genecards.org/cgi-bin/carddisj">https://www.genecards.org/cgi-bin/carddisj</a> |
| CBSL     | Cystathion Protein Co   | 18 | GC21M006:  | 5.19 | <a href="https://www.genecards.org/cgi-bin/carddisj">https://www.genecards.org/cgi-bin/carddisj</a> |
| SSB      | Small RNA Protein Co    | 44 | GC02P169:  | 5.19 | <a href="https://www.genecards.org/cgi-bin/carddisj">https://www.genecards.org/cgi-bin/carddisj</a> |
| SUPT6H   | SPT6 HomProtein Co      | 39 | GC17P028:  | 5.19 | <a href="https://www.genecards.org/cgi-bin/carddisj">https://www.genecards.org/cgi-bin/carddisj</a> |
| DUS2     | Dihydrouri Protein Co   | 37 | GC16P068:  | 5.19 | <a href="https://www.genecards.org/cgi-bin/carddisj">https://www.genecards.org/cgi-bin/carddisj</a> |
| SBF2     | SET BindinProtein Co    | 40 | GC11M009:  | 5.17 | <a href="https://www.genecards.org/cgi-bin/carddisj">https://www.genecards.org/cgi-bin/carddisj</a> |
| AIF1     | Allograft Ir Protein Co | 41 | GC06P033:  | 5.16 | <a href="https://www.genecards.org/cgi-bin/carddisj">https://www.genecards.org/cgi-bin/carddisj</a> |
| TFE3     | TranscriptiProtein Co   | 44 | GC0XM049:  | 5.12 | <a href="https://www.genecards.org/cgi-bin/carddisj">https://www.genecards.org/cgi-bin/carddisj</a> |
| KIF5A    | Kinesin FarProtein Co   | 45 | GC12P057:  | 5.11 | <a href="https://www.genecards.org/cgi-bin/carddisj">https://www.genecards.org/cgi-bin/carddisj</a> |
| TFF3     | Trefoil FactProtein Co  | 43 | GC21M042:  | 5.1  | <a href="https://www.genecards.org/cgi-bin/carddisj">https://www.genecards.org/cgi-bin/carddisj</a> |
| SAA4     | Serum AmProtein Co      | 40 | GC11M018:  | 5.09 | <a href="https://www.genecards.org/cgi-bin/carddisj">https://www.genecards.org/cgi-bin/carddisj</a> |
| TRIM21   | Tripartite NProtein Co  | 43 | GC11M004:  | 5.09 | <a href="https://www.genecards.org/cgi-bin/carddisj">https://www.genecards.org/cgi-bin/carddisj</a> |
| TREM1    | Triggering Protein Co   | 43 | GC06M041:  | 5.08 | <a href="https://www.genecards.org/cgi-bin/carddisj">https://www.genecards.org/cgi-bin/carddisj</a> |
| ZC3H11A  | Zinc FingeiProtein Co   | 39 | GC01P203:  | 5.07 | <a href="https://www.genecards.org/cgi-bin/carddisj">https://www.genecards.org/cgi-bin/carddisj</a> |
| DUOXA2   | Dual OxidProtein Co     | 36 | GC15P045:  | 5.07 | <a href="https://www.genecards.org/cgi-bin/carddisj">https://www.genecards.org/cgi-bin/carddisj</a> |
| TNFRSF8  | TNF RecepProtein Co     | 44 | GC01P012:  | 5.05 | <a href="https://www.genecards.org/cgi-bin/carddisj">https://www.genecards.org/cgi-bin/carddisj</a> |
| TRH      | Thyrotropi Protein Co   | 43 | GC03P129:  | 5.04 | <a href="https://www.genecards.org/cgi-bin/carddisj">https://www.genecards.org/cgi-bin/carddisj</a> |
| SERPINF2 | Serpin FarProtein Co    | 45 | GC17P001:  | 5.03 | <a href="https://www.genecards.org/cgi-bin/carddisj">https://www.genecards.org/cgi-bin/carddisj</a> |
| BLOC1S1  | Biogenesis Protein Co   | 37 | GC12P055:  | 5.01 | <a href="https://www.genecards.org/cgi-bin/carddisj">https://www.genecards.org/cgi-bin/carddisj</a> |
| DEFA1    | Defensin AProtein Co    | 40 | GC08M006:  | 5.01 | <a href="https://www.genecards.org/cgi-bin/carddisj">https://www.genecards.org/cgi-bin/carddisj</a> |
| ARSH     | ArylsulfataProtein Co   | 35 | GC0XP003:  | 5    | <a href="https://www.genecards.org/cgi-bin/carddisj">https://www.genecards.org/cgi-bin/carddisj</a> |
| IMPDH1   | Inosine McProtein Co    | 50 | GC07M128:  | 5    | <a href="https://www.genecards.org/cgi-bin/carddisj">https://www.genecards.org/cgi-bin/carddisj</a> |
| SELPLG   | Selectin P IProtein Co  | 44 | GC12M108:  | 4.99 | <a href="https://www.genecards.org/cgi-bin/carddisj">https://www.genecards.org/cgi-bin/carddisj</a> |
| FUT4     | FucosyltrarProtein Co   | 38 | GC11P094:  | 4.99 | <a href="https://www.genecards.org/cgi-bin/carddisj">https://www.genecards.org/cgi-bin/carddisj</a> |
| MT-RNR2  | MitochoncRNA Gene       | 20 | GCMTTP001: | 4.98 | <a href="https://www.genecards.org/cgi-bin/carddisj">https://www.genecards.org/cgi-bin/carddisj</a> |
| HBG1     | HemoglobProtein Co      | 43 | GC11M005:  | 4.97 | <a href="https://www.genecards.org/cgi-bin/carddisj">https://www.genecards.org/cgi-bin/carddisj</a> |
| ATP6V0A4 | ATPase H+Protein Co     | 44 | GC07M138:  | 4.94 | <a href="https://www.genecards.org/cgi-bin/carddisj">https://www.genecards.org/cgi-bin/carddisj</a> |
| MYNN     | MyoneurinProtein Co     | 39 | GC03P169:  | 4.88 | <a href="https://www.genecards.org/cgi-bin/carddisj">https://www.genecards.org/cgi-bin/carddisj</a> |
| FOXP2    | Forkhead EProtein Co    | 45 | GC07P114:  | 4.86 | <a href="https://www.genecards.org/cgi-bin/carddisj">https://www.genecards.org/cgi-bin/carddisj</a> |
| ACKR1    | Atypical ClProtein Co   | 39 | GC01P159:  | 4.84 | <a href="https://www.genecards.org/cgi-bin/carddisj">https://www.genecards.org/cgi-bin/carddisj</a> |
| COMP     | Cartilage CProtein Co   | 48 | GC19M018:  | 4.82 | <a href="https://www.genecards.org/cgi-bin/carddisj">https://www.genecards.org/cgi-bin/carddisj</a> |
| LYZ      | Lysozyme Protein Co     | 49 | GC12P069:  | 4.79 | <a href="https://www.genecards.org/cgi-bin/carddisj">https://www.genecards.org/cgi-bin/carddisj</a> |
| C1S      | ComplemeProtein Co      | 47 | GC12P007:  | 4.79 | <a href="https://www.genecards.org/cgi-bin/carddisj">https://www.genecards.org/cgi-bin/carddisj</a> |
| PROCR    | Protein C FProtein Co   | 44 | GC20P035:  | 4.79 | <a href="https://www.genecards.org/cgi-bin/carddisj">https://www.genecards.org/cgi-bin/carddisj</a> |
| FSCN1    | Fascin Acti Protein Co  | 44 | GC07P005:  | 4.73 | <a href="https://www.genecards.org/cgi-bin/carddisj">https://www.genecards.org/cgi-bin/carddisj</a> |
| ERF      | ETS2 ReprProtein Co     | 43 | GC19M042:  | 4.73 | <a href="https://www.genecards.org/cgi-bin/carddisj">https://www.genecards.org/cgi-bin/carddisj</a> |
| STK39    | Serine/ThriProtein Co   | 45 | GC02M167:  | 4.73 | <a href="https://www.genecards.org/cgi-bin/carddisj">https://www.genecards.org/cgi-bin/carddisj</a> |
| SPON1    | Spondin 1 Protein Co    | 36 | GC11P013:  | 4.71 | <a href="https://www.genecards.org/cgi-bin/carddisj">https://www.genecards.org/cgi-bin/carddisj</a> |
| MIPEP    | MitochoncProtein Co     | 43 | GC13M023:  | 4.66 | <a href="https://www.genecards.org/cgi-bin/carddisj">https://www.genecards.org/cgi-bin/carddisj</a> |
| HBD      | HemoglobProtein Co      | 40 | GC11M005:  | 4.65 | <a href="https://www.genecards.org/cgi-bin/carddisj">https://www.genecards.org/cgi-bin/carddisj</a> |
| DACT1    | DishevellecProtein Co   | 40 | GC14P058:  | 4.63 | <a href="https://www.genecards.org/cgi-bin/carddisj">https://www.genecards.org/cgi-bin/carddisj</a> |
| TXK      | TXK TyrosiProtein Co    | 47 | GC04M048:  | 4.59 | <a href="https://www.genecards.org/cgi-bin/carddisj">https://www.genecards.org/cgi-bin/carddisj</a> |
| SLC5A2   | Solute CarriProtein Co  | 48 | GC16P031:  | 4.56 | <a href="https://www.genecards.org/cgi-bin/carddisj">https://www.genecards.org/cgi-bin/carddisj</a> |
| HDC      | Histidine DProtein Co   | 46 | GC15M050:  | 4.56 | <a href="https://www.genecards.org/cgi-bin/carddisj">https://www.genecards.org/cgi-bin/carddisj</a> |
| CD1C     | CD1c MoleProtein Co     | 41 | GC01P158:  | 4.55 | <a href="https://www.genecards.org/cgi-bin/carddisj">https://www.genecards.org/cgi-bin/carddisj</a> |
| FERMT1   | Fermitin FProtein Co    | 42 | GC20M006:  | 4.53 | <a href="https://www.genecards.org/cgi-bin/carddisj">https://www.genecards.org/cgi-bin/carddisj</a> |
| ICAM2    | IntercellulaProtein Co  | 47 | GC17M064:  | 4.53 | <a href="https://www.genecards.org/cgi-bin/carddisj">https://www.genecards.org/cgi-bin/carddisj</a> |
| UGT1A6   | UDP GlucuProtein Co     | 41 | GC02P233:  | 4.52 | <a href="https://www.genecards.org/cgi-bin/carddisj">https://www.genecards.org/cgi-bin/carddisj</a> |
| CPB2     | Carboxype Protein Co    | 46 | GC13M046:  | 4.51 | <a href="https://www.genecards.org/cgi-bin/carddisj">https://www.genecards.org/cgi-bin/carddisj</a> |

|           |                        |    |          |      |                                                                                                     |
|-----------|------------------------|----|----------|------|-----------------------------------------------------------------------------------------------------|
| LAPTM4A   | Lysosomal Protein Co   | 39 | GC02M020 | 4.49 | <a href="https://www.genecards.org/cgi-bin/carddisj">https://www.genecards.org/cgi-bin/carddisj</a> |
| LINC01094 | Long InterRNA Gene     | 13 | GC04P078 | 4.49 | <a href="https://www.genecards.org/cgi-bin/carddisj">https://www.genecards.org/cgi-bin/carddisj</a> |
| UGT1A8    | UDP GlucuProtein Co    | 36 | GC02P233 | 4.49 | <a href="https://www.genecards.org/cgi-bin/carddisj">https://www.genecards.org/cgi-bin/carddisj</a> |
| MIR24-1   | MicroRNA RNA Gene      | 20 | GC09P095 | 4.47 | <a href="https://www.genecards.org/cgi-bin/carddisj">https://www.genecards.org/cgi-bin/carddisj</a> |
| ACYP2     | AcylphospiProtein Co   | 41 | GC02P053 | 4.47 | <a href="https://www.genecards.org/cgi-bin/carddisj">https://www.genecards.org/cgi-bin/carddisj</a> |
| LAMP2     | Lysosomal Protein Co   | 46 | GC0XM120 | 4.45 | <a href="https://www.genecards.org/cgi-bin/carddisj">https://www.genecards.org/cgi-bin/carddisj</a> |
| NANOG     | Nanog HoProtein Co     | 41 | GC12P007 | 4.44 | <a href="https://www.genecards.org/cgi-bin/carddisj">https://www.genecards.org/cgi-bin/carddisj</a> |
| PRKAG2    | Protein KinProtein Co  | 51 | GC07M151 | 4.42 | <a href="https://www.genecards.org/cgi-bin/carddisj">https://www.genecards.org/cgi-bin/carddisj</a> |
| CSK       | C-TerminaProtein Co    | 49 | GC15P074 | 4.41 | <a href="https://www.genecards.org/cgi-bin/carddisj">https://www.genecards.org/cgi-bin/carddisj</a> |
| GBA2      | Glucosylce Protein Co  | 42 | GC09M035 | 4.38 | <a href="https://www.genecards.org/cgi-bin/carddisj">https://www.genecards.org/cgi-bin/carddisj</a> |
| PRICKLE4  | Prickle PlarProtein Co | 36 | GC06P041 | 4.37 | <a href="https://www.genecards.org/cgi-bin/carddisj">https://www.genecards.org/cgi-bin/carddisj</a> |
| THBS4     | ThrombosjProtein Co    | 44 | GC05P079 | 4.3  | <a href="https://www.genecards.org/cgi-bin/carddisj">https://www.genecards.org/cgi-bin/carddisj</a> |
| ATP5F1A   | ATP SynthiProtein Co   | 37 | GC18M046 | 4.3  | <a href="https://www.genecards.org/cgi-bin/carddisj">https://www.genecards.org/cgi-bin/carddisj</a> |
| SLC22A6   | Solute CarjProtein Co  | 45 | GC11M063 | 4.29 | <a href="https://www.genecards.org/cgi-bin/carddisj">https://www.genecards.org/cgi-bin/carddisj</a> |
| CD1E      | CD1e MolProtein Co     | 40 | GC01P158 | 4.28 | <a href="https://www.genecards.org/cgi-bin/carddisj">https://www.genecards.org/cgi-bin/carddisj</a> |
| MT-TF     | MitochondcRNA Gene     | 14 | GCMTPO00 | 4.28 | <a href="https://www.genecards.org/cgi-bin/carddisj">https://www.genecards.org/cgi-bin/carddisj</a> |
| LBP       | LipopolysaProtein Co   | 45 | GC20P038 | 4.25 | <a href="https://www.genecards.org/cgi-bin/carddisj">https://www.genecards.org/cgi-bin/carddisj</a> |
| HBS1L     | HBS1 Like Protein Co   | 40 | GC06M134 | 4.25 | <a href="https://www.genecards.org/cgi-bin/carddisj">https://www.genecards.org/cgi-bin/carddisj</a> |
| CEACAM8   | CEA Cell A Protein Co  | 39 | GC19M042 | 4.24 | <a href="https://www.genecards.org/cgi-bin/carddisj">https://www.genecards.org/cgi-bin/carddisj</a> |
| CABIN1    | CalcineurirProtein Co  | 43 | GC22P024 | 4.19 | <a href="https://www.genecards.org/cgi-bin/carddisj">https://www.genecards.org/cgi-bin/carddisj</a> |
| CLEC4D    | C-Type LeiProtein Co   | 39 | GC12P008 | 4.19 | <a href="https://www.genecards.org/cgi-bin/carddisj">https://www.genecards.org/cgi-bin/carddisj</a> |
| ZBTB46    | Zinc FingeiProtein Co  | 36 | GC20M063 | 4.19 | <a href="https://www.genecards.org/cgi-bin/carddisj">https://www.genecards.org/cgi-bin/carddisj</a> |
| PRDM12    | PR/SET DoProtein Co    | 38 | GC09P130 | 4.17 | <a href="https://www.genecards.org/cgi-bin/carddisj">https://www.genecards.org/cgi-bin/carddisj</a> |
| FBL       | Fibrillarj Protein Co  | 44 | GC19M039 | 4.16 | <a href="https://www.genecards.org/cgi-bin/carddisj">https://www.genecards.org/cgi-bin/carddisj</a> |
| BDKRB2    | Bradykinin Protein Co  | 45 | GC14P096 | 4.16 | <a href="https://www.genecards.org/cgi-bin/carddisj">https://www.genecards.org/cgi-bin/carddisj</a> |
| VAV3      | Vav GuanirProtein Co   | 45 | GC01M107 | 4.15 | <a href="https://www.genecards.org/cgi-bin/carddisj">https://www.genecards.org/cgi-bin/carddisj</a> |
| CCS       | Copper ChProtein Co    | 44 | GC11P066 | 4.12 | <a href="https://www.genecards.org/cgi-bin/carddisj">https://www.genecards.org/cgi-bin/carddisj</a> |
| LOC11287  | Sharpr-MF Biological I | 2  | GC03U903 | 4.1  | <a href="https://www.genecards.org/cgi-bin/carddisj">https://www.genecards.org/cgi-bin/carddisj</a> |
| RO60      | Ro60, Y RNProtein Co   | 31 | GC01P193 | 4.04 | <a href="https://www.genecards.org/cgi-bin/carddisj">https://www.genecards.org/cgi-bin/carddisj</a> |
| BMX       | BMX Non-Protein Co     | 46 | GC0XP015 | 4.03 | <a href="https://www.genecards.org/cgi-bin/carddisj">https://www.genecards.org/cgi-bin/carddisj</a> |
| SH3BP5    | SH3 DomaProtein Co     | 41 | GC03M015 | 4.03 | <a href="https://www.genecards.org/cgi-bin/carddisj">https://www.genecards.org/cgi-bin/carddisj</a> |
| SLC35C1   | Solute CarjProtein Co  | 40 | GC11P045 | 4.01 | <a href="https://www.genecards.org/cgi-bin/carddisj">https://www.genecards.org/cgi-bin/carddisj</a> |
| SLC12A5   | Solute CarjProtein Co  | 48 | GC20P046 | 3.99 | <a href="https://www.genecards.org/cgi-bin/carddisj">https://www.genecards.org/cgi-bin/carddisj</a> |
| LCOR      | Ligand DejProtein Co   | 39 | GC10P096 | 3.98 | <a href="https://www.genecards.org/cgi-bin/carddisj">https://www.genecards.org/cgi-bin/carddisj</a> |
| TFEB      | TranscriptiProtein Co  | 43 | GC06M041 | 3.95 | <a href="https://www.genecards.org/cgi-bin/carddisj">https://www.genecards.org/cgi-bin/carddisj</a> |
| SCG2      | SecretograProtein Co   | 40 | GC02M223 | 3.94 | <a href="https://www.genecards.org/cgi-bin/carddisj">https://www.genecards.org/cgi-bin/carddisj</a> |
| OMP       | Olfactory MProtein Co  | 39 | GC11P077 | 3.91 | <a href="https://www.genecards.org/cgi-bin/carddisj">https://www.genecards.org/cgi-bin/carddisj</a> |
| HSD3B1    | Hydroxy-LProtein Co    | 44 | GC01P119 | 3.91 | <a href="https://www.genecards.org/cgi-bin/carddisj">https://www.genecards.org/cgi-bin/carddisj</a> |
| BYSL      | Bystin Like Protein Co | 39 | GC06P046 | 3.91 | <a href="https://www.genecards.org/cgi-bin/carddisj">https://www.genecards.org/cgi-bin/carddisj</a> |
| ITGA2     | Integrin SuProtein Co  | 47 | GC05P052 | 3.9  | <a href="https://www.genecards.org/cgi-bin/carddisj">https://www.genecards.org/cgi-bin/carddisj</a> |
| CHKA      | Choline KirProtein Co  | 43 | GC11M068 | 3.88 | <a href="https://www.genecards.org/cgi-bin/carddisj">https://www.genecards.org/cgi-bin/carddisj</a> |
| SLCO4A1   | Solute CarjProtein Co  | 43 | GC20P062 | 3.86 | <a href="https://www.genecards.org/cgi-bin/carddisj">https://www.genecards.org/cgi-bin/carddisj</a> |
| SLC12A2   | Solute CarjProtein Co  | 47 | GC05P128 | 3.83 | <a href="https://www.genecards.org/cgi-bin/carddisj">https://www.genecards.org/cgi-bin/carddisj</a> |
| FLVCR2    | FLVCR HerProtein Co    | 42 | GC14P075 | 3.83 | <a href="https://www.genecards.org/cgi-bin/carddisj">https://www.genecards.org/cgi-bin/carddisj</a> |
| FERMT3    | Fermitin FaProtein Co  | 44 | GC11P064 | 3.81 | <a href="https://www.genecards.org/cgi-bin/carddisj">https://www.genecards.org/cgi-bin/carddisj</a> |
| FCRL6     | Fc ReceptcProtein Co   | 35 | GC01P159 | 3.81 | <a href="https://www.genecards.org/cgi-bin/carddisj">https://www.genecards.org/cgi-bin/carddisj</a> |
| CGB3      | Chorionic (Protein Co  | 32 | GC19M049 | 3.79 | <a href="https://www.genecards.org/cgi-bin/carddisj">https://www.genecards.org/cgi-bin/carddisj</a> |
| POLR2B    | RNA PolynProtein Co    | 43 | GC04P056 | 3.78 | <a href="https://www.genecards.org/cgi-bin/carddisj">https://www.genecards.org/cgi-bin/carddisj</a> |
| COMMD1    | Copper MeProtein Co    | 43 | GC02P061 | 3.73 | <a href="https://www.genecards.org/cgi-bin/carddisj">https://www.genecards.org/cgi-bin/carddisj</a> |
| HOXD13    | HomeoboProtein Co      | 41 | GC02P176 | 3.72 | <a href="https://www.genecards.org/cgi-bin/carddisj">https://www.genecards.org/cgi-bin/carddisj</a> |
| CD1B      | CD1b MolProtein Co     | 41 | GC01M158 | 3.71 | <a href="https://www.genecards.org/cgi-bin/carddisj">https://www.genecards.org/cgi-bin/carddisj</a> |
| LY96      | LymphocyjProtein Co    | 43 | GC08P073 | 3.71 | <a href="https://www.genecards.org/cgi-bin/carddisj">https://www.genecards.org/cgi-bin/carddisj</a> |
| SNRNP70   | Small Nucl Protein Co  | 39 | GC19P049 | 3.71 | <a href="https://www.genecards.org/cgi-bin/carddisj">https://www.genecards.org/cgi-bin/carddisj</a> |
| TEC       | Tec ProteirProtein Co  | 47 | GC04M048 | 3.7  | <a href="https://www.genecards.org/cgi-bin/carddisj">https://www.genecards.org/cgi-bin/carddisj</a> |
| MTX1      | Metaxin 1 Protein Co   | 40 | GC01P155 | 3.69 | <a href="https://www.genecards.org/cgi-bin/carddisj">https://www.genecards.org/cgi-bin/carddisj</a> |
| PLOD2     | Procollage Protein Co  | 46 | GC03M146 | 3.68 | <a href="https://www.genecards.org/cgi-bin/carddisj">https://www.genecards.org/cgi-bin/carddisj</a> |
| OR51B5    | Olfactory FProtein Co  | 35 | GC11M005 | 3.67 | <a href="https://www.genecards.org/cgi-bin/carddisj">https://www.genecards.org/cgi-bin/carddisj</a> |
| OR51B6    | Olfactory FProtein Co  | 32 | GC11P005 | 3.67 | <a href="https://www.genecards.org/cgi-bin/carddisj">https://www.genecards.org/cgi-bin/carddisj</a> |

|          |                                 |    |          |      |                                                                                                     |
|----------|---------------------------------|----|----------|------|-----------------------------------------------------------------------------------------------------|
| NR1H3    | Nuclear ReProtein Co            | 48 | GC11P047 | 3.65 | <a href="https://www.genecards.org/cgi-bin/carddisj">https://www.genecards.org/cgi-bin/carddisj</a> |
| SP3      | Sp3 TranscProtein Co            | 43 | GC02M173 | 3.64 | <a href="https://www.genecards.org/cgi-bin/carddisj">https://www.genecards.org/cgi-bin/carddisj</a> |
| RGS10    | Regulator (Protein Co           | 44 | GC10M119 | 3.64 | <a href="https://www.genecards.org/cgi-bin/carddisj">https://www.genecards.org/cgi-bin/carddisj</a> |
| SLC6A19  | Solute CarProtein Co            | 45 | GC05P001 | 3.62 | <a href="https://www.genecards.org/cgi-bin/carddisj">https://www.genecards.org/cgi-bin/carddisj</a> |
| ITGAD    | Integrin SuProtein Co           | 37 | GC16P031 | 3.6  | <a href="https://www.genecards.org/cgi-bin/carddisj">https://www.genecards.org/cgi-bin/carddisj</a> |
| GOLPH3   | Golgi PhosProtein Co            | 41 | GC05M032 | 3.59 | <a href="https://www.genecards.org/cgi-bin/carddisj">https://www.genecards.org/cgi-bin/carddisj</a> |
| LRRK1    | Leucine RicProtein Co           | 39 | GC15P100 | 3.59 | <a href="https://www.genecards.org/cgi-bin/carddisj">https://www.genecards.org/cgi-bin/carddisj</a> |
| MTAP     | MethylthioProtein Co            | 48 | GC09P021 | 3.59 | <a href="https://www.genecards.org/cgi-bin/carddisj">https://www.genecards.org/cgi-bin/carddisj</a> |
| CCDC154  | Coiled-CoiProtein Co            | 30 | GC16M001 | 3.55 | <a href="https://www.genecards.org/cgi-bin/carddisj">https://www.genecards.org/cgi-bin/carddisj</a> |
| DEFB105A | Defensin BProtein Co            | 27 | GC08M007 | 3.55 | <a href="https://www.genecards.org/cgi-bin/carddisj">https://www.genecards.org/cgi-bin/carddisj</a> |
| DEFB105B | Defensin BProtein Co            | 25 | GC08P007 | 3.55 | <a href="https://www.genecards.org/cgi-bin/carddisj">https://www.genecards.org/cgi-bin/carddisj</a> |
| DIPK1C   | Divergent (Protein Co           | 24 | GC18M074 | 3.55 | <a href="https://www.genecards.org/cgi-bin/carddisj">https://www.genecards.org/cgi-bin/carddisj</a> |
| BLZF1    | Basic LeuciProtein Co           | 40 | GC01P169 | 3.54 | <a href="https://www.genecards.org/cgi-bin/carddisj">https://www.genecards.org/cgi-bin/carddisj</a> |
| IL19     | Interleukin Protein Co          | 41 | GC01P206 | 3.54 | <a href="https://www.genecards.org/cgi-bin/carddisj">https://www.genecards.org/cgi-bin/carddisj</a> |
| ATOX1    | AntioxidanProtein Co            | 41 | GC05M151 | 3.53 | <a href="https://www.genecards.org/cgi-bin/carddisj">https://www.genecards.org/cgi-bin/carddisj</a> |
| CLN8     | CLN8 Tran Protein Co            | 41 | GC08P001 | 3.53 | <a href="https://www.genecards.org/cgi-bin/carddisj">https://www.genecards.org/cgi-bin/carddisj</a> |
| SLC31A1  | Solute CarProtein Co            | 44 | GC09P113 | 3.49 | <a href="https://www.genecards.org/cgi-bin/carddisj">https://www.genecards.org/cgi-bin/carddisj</a> |
| TSSK1B   | Testis SpecProtein Co           | 36 | GC05M113 | 3.49 | <a href="https://www.genecards.org/cgi-bin/carddisj">https://www.genecards.org/cgi-bin/carddisj</a> |
| AGMX2    | Agammag Genetic Lo              | 4  | GC0XU990 | 3.49 | <a href="https://www.genecards.org/cgi-bin/carddisj">https://www.genecards.org/cgi-bin/carddisj</a> |
| TLN1     | Talin 1 Protein Co              | 43 | GC09M035 | 3.47 | <a href="https://www.genecards.org/cgi-bin/carddisj">https://www.genecards.org/cgi-bin/carddisj</a> |
| DEFB103B | Defensin BProtein Co            | 31 | GC08M007 | 3.46 | <a href="https://www.genecards.org/cgi-bin/carddisj">https://www.genecards.org/cgi-bin/carddisj</a> |
| RASGRP2  | RAS GuanyProtein Co             | 47 | GC11M064 | 3.42 | <a href="https://www.genecards.org/cgi-bin/carddisj">https://www.genecards.org/cgi-bin/carddisj</a> |
| METAP2   | Methionyl Protein Co            | 44 | GC12P095 | 3.37 | <a href="https://www.genecards.org/cgi-bin/carddisj">https://www.genecards.org/cgi-bin/carddisj</a> |
| RECQL4   | RecQ Like Protein Co            | 43 | GC08M144 | 3.36 | <a href="https://www.genecards.org/cgi-bin/carddisj">https://www.genecards.org/cgi-bin/carddisj</a> |
| NINJ1    | Ninjurin 1 Protein Co           | 40 | GC09M093 | 3.3  | <a href="https://www.genecards.org/cgi-bin/carddisj">https://www.genecards.org/cgi-bin/carddisj</a> |
| B4GALNT2 | Beta-1,4-NProtein Co            | 41 | GC17P049 | 3.29 | <a href="https://www.genecards.org/cgi-bin/carddisj">https://www.genecards.org/cgi-bin/carddisj</a> |
| ELP3     | Elongator ,Protein Co           | 40 | GC08P028 | 3.29 | <a href="https://www.genecards.org/cgi-bin/carddisj">https://www.genecards.org/cgi-bin/carddisj</a> |
| TRAT1    | T Cell ReceProtein Co           | 38 | GC03P108 | 3.29 | <a href="https://www.genecards.org/cgi-bin/carddisj">https://www.genecards.org/cgi-bin/carddisj</a> |
| ALLC     | AllantoicasProtein Co           | 36 | GC02P003 | 3.29 | <a href="https://www.genecards.org/cgi-bin/carddisj">https://www.genecards.org/cgi-bin/carddisj</a> |
| SAA2     | Serum AmProtein Co              | 36 | GC11M018 | 3.19 | <a href="https://www.genecards.org/cgi-bin/carddisj">https://www.genecards.org/cgi-bin/carddisj</a> |
| SPART    | Spartin Protein Co              | 32 | GC13M036 | 3.13 | <a href="https://www.genecards.org/cgi-bin/carddisj">https://www.genecards.org/cgi-bin/carddisj</a> |
| ZNF169   | Zinc FingerProtein Co           | 39 | GC09P094 | 3.09 | <a href="https://www.genecards.org/cgi-bin/carddisj">https://www.genecards.org/cgi-bin/carddisj</a> |
| NFIL3    | Nuclear FaProtein Co            | 41 | GC09M091 | 3.09 | <a href="https://www.genecards.org/cgi-bin/carddisj">https://www.genecards.org/cgi-bin/carddisj</a> |
| FERMT2   | Fermitin FaProtein Co           | 39 | GC14M052 | 3.09 | <a href="https://www.genecards.org/cgi-bin/carddisj">https://www.genecards.org/cgi-bin/carddisj</a> |
| BDNF-AS  | BDNF Anti:RNA Gene              | 20 | GC11P027 | 3.09 | <a href="https://www.genecards.org/cgi-bin/carddisj">https://www.genecards.org/cgi-bin/carddisj</a> |
| APBB1IP  | Amyloid BProtein Co             | 42 | GC10P026 | 3.04 | <a href="https://www.genecards.org/cgi-bin/carddisj">https://www.genecards.org/cgi-bin/carddisj</a> |
| CNOT8    | CCR4-NO <sup>-</sup> Protein Co | 41 | GC05P154 | 3.04 | <a href="https://www.genecards.org/cgi-bin/carddisj">https://www.genecards.org/cgi-bin/carddisj</a> |
| SLCO1C1  | Solute CarProtein Co            | 40 | GC12P020 | 3.04 | <a href="https://www.genecards.org/cgi-bin/carddisj">https://www.genecards.org/cgi-bin/carddisj</a> |
| ZNF2     | Zinc FingerProtein Co           | 36 | GC02P095 | 3.04 | <a href="https://www.genecards.org/cgi-bin/carddisj">https://www.genecards.org/cgi-bin/carddisj</a> |
| DOP1A    | DOP1 LeucProtein Co             | 27 | GC06P083 | 3.04 | <a href="https://www.genecards.org/cgi-bin/carddisj">https://www.genecards.org/cgi-bin/carddisj</a> |
| LOC10662 | GBA Recor Biological I          | 2  | GC01U905 | 3.04 | <a href="https://www.genecards.org/cgi-bin/carddisj">https://www.genecards.org/cgi-bin/carddisj</a> |
| HPGD     | 15-HydroxProtein Co             | 50 | GC04M174 | 3.04 | <a href="https://www.genecards.org/cgi-bin/carddisj">https://www.genecards.org/cgi-bin/carddisj</a> |
| IBSP     | Integrin BirProtein Co          | 39 | GC04P087 | 3.03 | <a href="https://www.genecards.org/cgi-bin/carddisj">https://www.genecards.org/cgi-bin/carddisj</a> |
| FBXO32   | F-Box ProtProtein Co            | 41 | GC08M123 | 3.01 | <a href="https://www.genecards.org/cgi-bin/carddisj">https://www.genecards.org/cgi-bin/carddisj</a> |
| ZBTB38   | Zinc FingerProtein Co           | 37 | GC03P141 | 3    | <a href="https://www.genecards.org/cgi-bin/carddisj">https://www.genecards.org/cgi-bin/carddisj</a> |
| LTB4R    | Leukotrien Protein Co           | 45 | GC14P024 | 2.98 | <a href="https://www.genecards.org/cgi-bin/carddisj">https://www.genecards.org/cgi-bin/carddisj</a> |
| PLB1     | PhospholipProtein Co            | 37 | GC02P028 | 2.95 | <a href="https://www.genecards.org/cgi-bin/carddisj">https://www.genecards.org/cgi-bin/carddisj</a> |
| ZHX2     | Zinc FingerProtein Co           | 38 | GC08P122 | 2.92 | <a href="https://www.genecards.org/cgi-bin/carddisj">https://www.genecards.org/cgi-bin/carddisj</a> |
| SAMM50   | SAMM50 SProtein Co              | 38 | GC22P043 | 2.88 | <a href="https://www.genecards.org/cgi-bin/carddisj">https://www.genecards.org/cgi-bin/carddisj</a> |
| GAS2     | Growth AnProtein Co             | 40 | GC11P022 | 2.87 | <a href="https://www.genecards.org/cgi-bin/carddisj">https://www.genecards.org/cgi-bin/carddisj</a> |
| GBA3     | Glucosylce Protein Co           | 37 | GC04P022 | 2.83 | <a href="https://www.genecards.org/cgi-bin/carddisj">https://www.genecards.org/cgi-bin/carddisj</a> |
| CGB7     | Chorionic (Protein Co           | 31 | GC19M049 | 2.83 | <a href="https://www.genecards.org/cgi-bin/carddisj">https://www.genecards.org/cgi-bin/carddisj</a> |
| CCT4     | ChaperoniiProtein Co            | 41 | GC02M061 | 2.81 | <a href="https://www.genecards.org/cgi-bin/carddisj">https://www.genecards.org/cgi-bin/carddisj</a> |
| TRDMT1   | TRNA AspProtein Co              | 41 | GC10M017 | 2.81 | <a href="https://www.genecards.org/cgi-bin/carddisj">https://www.genecards.org/cgi-bin/carddisj</a> |
| TUB      | TUB Bipart Protein Co           | 44 | GC11P008 | 2.73 | <a href="https://www.genecards.org/cgi-bin/carddisj">https://www.genecards.org/cgi-bin/carddisj</a> |
| DNMT3L   | DNA MethProtein Co              | 43 | GC21M044 | 2.73 | <a href="https://www.genecards.org/cgi-bin/carddisj">https://www.genecards.org/cgi-bin/carddisj</a> |
| THBS3    | ThrombosProtein Co              | 42 | GC01M155 | 2.73 | <a href="https://www.genecards.org/cgi-bin/carddisj">https://www.genecards.org/cgi-bin/carddisj</a> |
| METAP1   | Methionyl Protein Co            | 40 | GC04P098 | 2.73 | <a href="https://www.genecards.org/cgi-bin/carddisj">https://www.genecards.org/cgi-bin/carddisj</a> |

|           |                                   |    |           |      |                                                                                                     |
|-----------|-----------------------------------|----|-----------|------|-----------------------------------------------------------------------------------------------------|
| SLC6A18   | Solute Carrier Protein Co         | 39 | GC05P001: | 2.73 | <a href="https://www.genecards.org/cgi-bin/carddisj">https://www.genecards.org/cgi-bin/carddisj</a> |
| CLTRN     | Collectrin, Protein Co            | 29 | GC0XM015: | 2.73 | <a href="https://www.genecards.org/cgi-bin/carddisj">https://www.genecards.org/cgi-bin/carddisj</a> |
| HSFX1     | Heat Shock Protein Co             | 28 | GC0XP149: | 2.73 | <a href="https://www.genecards.org/cgi-bin/carddisj">https://www.genecards.org/cgi-bin/carddisj</a> |
| HSFX2     | Heat Shock Protein Co             | 27 | GC0XM149: | 2.73 | <a href="https://www.genecards.org/cgi-bin/carddisj">https://www.genecards.org/cgi-bin/carddisj</a> |
| LOC102721 | Uncharacterized RNA Gene          | 8  | GC14M075: | 2.73 | <a href="https://www.genecards.org/cgi-bin/carddisj">https://www.genecards.org/cgi-bin/carddisj</a> |
| CYP4F3    | Cytochrome Protein Co             | 43 | GC19P015: | 2.57 | <a href="https://www.genecards.org/cgi-bin/carddisj">https://www.genecards.org/cgi-bin/carddisj</a> |
| SLC6A5    | Solute Carrier Protein Co         | 47 | GC11P020: | 2.53 | <a href="https://www.genecards.org/cgi-bin/carddisj">https://www.genecards.org/cgi-bin/carddisj</a> |
| TRIM63    | Tripartite Motif Protein Co       | 41 | GC01M026: | 2.53 | <a href="https://www.genecards.org/cgi-bin/carddisj">https://www.genecards.org/cgi-bin/carddisj</a> |
| IL20      | Interleukin Protein Co            | 41 | GC01P206: | 2.51 | <a href="https://www.genecards.org/cgi-bin/carddisj">https://www.genecards.org/cgi-bin/carddisj</a> |
| IGSF3     | Immunoglobulin Protein Co         | 40 | GC01M116: | 2.5  | <a href="https://www.genecards.org/cgi-bin/carddisj">https://www.genecards.org/cgi-bin/carddisj</a> |
| IRAK4     | Interleukin Protein Co            | 50 | GC12P043: | 2.44 | <a href="https://www.genecards.org/cgi-bin/carddisj">https://www.genecards.org/cgi-bin/carddisj</a> |
| CTSH      | Cathepsin Protein Co              | 48 | GC15M078: | 2.42 | <a href="https://www.genecards.org/cgi-bin/carddisj">https://www.genecards.org/cgi-bin/carddisj</a> |
| ATP6V0A2  | ATPase H <sup>+</sup> Protein Co  | 44 | GC12P123: | 2.36 | <a href="https://www.genecards.org/cgi-bin/carddisj">https://www.genecards.org/cgi-bin/carddisj</a> |
| ACP3      | Acid Phosphatase Protein Co       | 36 | GC03P132: | 2.28 | <a href="https://www.genecards.org/cgi-bin/carddisj">https://www.genecards.org/cgi-bin/carddisj</a> |
| CXCR6     | C-X-C Motif Protein Co            | 41 | GC03P045: | 2.07 | <a href="https://www.genecards.org/cgi-bin/carddisj">https://www.genecards.org/cgi-bin/carddisj</a> |
| WNT11     | Wnt Family Protein Co             | 45 | GC11M076: | 2.07 | <a href="https://www.genecards.org/cgi-bin/carddisj">https://www.genecards.org/cgi-bin/carddisj</a> |
| SNRPA     | Small Nuclear Protein Co          | 41 | GC19P040: | 1.93 | <a href="https://www.genecards.org/cgi-bin/carddisj">https://www.genecards.org/cgi-bin/carddisj</a> |
| EPHX2     | Epoxide Hydrolase Protein Co      | 49 | GC08P027: | 1.86 | <a href="https://www.genecards.org/cgi-bin/carddisj">https://www.genecards.org/cgi-bin/carddisj</a> |
| MASP1     | Mannan Binds Protein Co           | 48 | GC03M187: | 1.75 | <a href="https://www.genecards.org/cgi-bin/carddisj">https://www.genecards.org/cgi-bin/carddisj</a> |
| MT2A      | Metallothionein Protein Co        | 43 | GC16P056: | 1.74 | <a href="https://www.genecards.org/cgi-bin/carddisj">https://www.genecards.org/cgi-bin/carddisj</a> |
| ESD       | Esterase D Protein Co             | 44 | GC13M046: | 1.68 | <a href="https://www.genecards.org/cgi-bin/carddisj">https://www.genecards.org/cgi-bin/carddisj</a> |
| HTN3      | Histatin 3 Protein Co             | 36 | GC04P070: | 1.65 | <a href="https://www.genecards.org/cgi-bin/carddisj">https://www.genecards.org/cgi-bin/carddisj</a> |
| LPIN1     | Lipin 1 Protein Co                | 48 | GC02P011: | 1.55 | <a href="https://www.genecards.org/cgi-bin/carddisj">https://www.genecards.org/cgi-bin/carddisj</a> |
| CEACAM4   | CEA Cell Adhesion Protein Co      | 33 | GC19M041: | 1.52 | <a href="https://www.genecards.org/cgi-bin/carddisj">https://www.genecards.org/cgi-bin/carddisj</a> |
| DNM3      | Dynamin 3 Protein Co              | 44 | GC01P171: | 1.5  | <a href="https://www.genecards.org/cgi-bin/carddisj">https://www.genecards.org/cgi-bin/carddisj</a> |
| STOML2    | Stomatin Like Protein Co          | 39 | GC09M035: | 1.46 | <a href="https://www.genecards.org/cgi-bin/carddisj">https://www.genecards.org/cgi-bin/carddisj</a> |
| ATP6V0E2  | ATPase H <sup>+</sup> Protein Co  | 38 | GC07P149: | 1.44 | <a href="https://www.genecards.org/cgi-bin/carddisj">https://www.genecards.org/cgi-bin/carddisj</a> |
| RNF115    | Ring Finger Protein Co            | 36 | GC01M145: | 1.44 | <a href="https://www.genecards.org/cgi-bin/carddisj">https://www.genecards.org/cgi-bin/carddisj</a> |
| UHRF2     | Ubiquitin Like Protein Co         | 40 | GC09P006: | 1.37 | <a href="https://www.genecards.org/cgi-bin/carddisj">https://www.genecards.org/cgi-bin/carddisj</a> |
| WNK4      | WNK Lysin Protein Co              | 45 | GC17P043: | 1.37 | <a href="https://www.genecards.org/cgi-bin/carddisj">https://www.genecards.org/cgi-bin/carddisj</a> |
| INTS8     | Integrator Protein Co             | 37 | GC08P094: | 1.35 | <a href="https://www.genecards.org/cgi-bin/carddisj">https://www.genecards.org/cgi-bin/carddisj</a> |
| RASGRF1   | Ras GTPase Activator Protein Co   | 44 | GC15M078: | 1.25 | <a href="https://www.genecards.org/cgi-bin/carddisj">https://www.genecards.org/cgi-bin/carddisj</a> |
| EXOSC10   | Exosome Component Protein Co      | 40 | GC01M011: | 1.21 | <a href="https://www.genecards.org/cgi-bin/carddisj">https://www.genecards.org/cgi-bin/carddisj</a> |
| MAP3K15   | Mitogen-Activated Protein Co      | 35 | GC0XM019: | 1.21 | <a href="https://www.genecards.org/cgi-bin/carddisj">https://www.genecards.org/cgi-bin/carddisj</a> |
| CGB8      | Chorionic Gonadotropin Protein Co | 28 | GC19M049: | 1.21 | <a href="https://www.genecards.org/cgi-bin/carddisj">https://www.genecards.org/cgi-bin/carddisj</a> |
| EPS15     | Epidermal Protein Co              | 47 | GC01M051: | 1.15 | <a href="https://www.genecards.org/cgi-bin/carddisj">https://www.genecards.org/cgi-bin/carddisj</a> |
| PTGES3    | Prostaglandin Protein Co          | 46 | GC12M056: | 1.12 | <a href="https://www.genecards.org/cgi-bin/carddisj">https://www.genecards.org/cgi-bin/carddisj</a> |
| GJB3      | Gap Junction Protein Co           | 45 | GC01P034: | 1.09 | <a href="https://www.genecards.org/cgi-bin/carddisj">https://www.genecards.org/cgi-bin/carddisj</a> |
| GPD1      | Glycerol-3 Phosphate Protein Co   | 47 | GC12P050: | 1.09 | <a href="https://www.genecards.org/cgi-bin/carddisj">https://www.genecards.org/cgi-bin/carddisj</a> |
| PGAM1     | Phosphoglucomutase Protein Co     | 44 | GC10P097: | 1.06 | <a href="https://www.genecards.org/cgi-bin/carddisj">https://www.genecards.org/cgi-bin/carddisj</a> |
| PTGES2    | Prostaglandin Protein Co          | 44 | GC09M128: | 1.05 | <a href="https://www.genecards.org/cgi-bin/carddisj">https://www.genecards.org/cgi-bin/carddisj</a> |
| TCP1      | T-Complex Protein Co              | 43 | GC06M159: | 1.05 | <a href="https://www.genecards.org/cgi-bin/carddisj">https://www.genecards.org/cgi-bin/carddisj</a> |
| MTERF1    | Mitochondrial Protein Co          | 36 | GC07M091: | 1.05 | <a href="https://www.genecards.org/cgi-bin/carddisj">https://www.genecards.org/cgi-bin/carddisj</a> |
| MTF1      | Metal Regulator Protein Co        | 42 | GC01M037: | 1.03 | <a href="https://www.genecards.org/cgi-bin/carddisj">https://www.genecards.org/cgi-bin/carddisj</a> |
| C11orf58  | Chromosome Protein Co             | 37 | GC11P016: | 1.03 | <a href="https://www.genecards.org/cgi-bin/carddisj">https://www.genecards.org/cgi-bin/carddisj</a> |
| GALNT3    | Polypeptide Protein Co            | 47 | GC02M165: | 0.79 | <a href="https://www.genecards.org/cgi-bin/carddisj">https://www.genecards.org/cgi-bin/carddisj</a> |
| C4BPB     | Complement Protein Co             | 41 | GC01P207: | 0.74 | <a href="https://www.genecards.org/cgi-bin/carddisj">https://www.genecards.org/cgi-bin/carddisj</a> |
| C4BPA     | Complement Protein Co             | 40 | GC01P207: | 0.48 | <a href="https://www.genecards.org/cgi-bin/carddisj">https://www.genecards.org/cgi-bin/carddisj</a> |
| WNT6      | Wnt Family Protein Co             | 42 | GC02P218: | 0.44 | <a href="https://www.genecards.org/cgi-bin/carddisj">https://www.genecards.org/cgi-bin/carddisj</a> |

p.pl?gene=TNF  
p.pl?gene=IL1RN  
p.pl?gene=IL6  
p.pl?gene=IL1B  
p.pl?gene=IL10  
p.pl?gene=IFNG  
p.pl?gene=NLRP3  
p.pl?gene=CYBB  
p.pl?gene=TERT  
p.pl?gene=TNFSF11  
p.pl?gene=TLR4  
p.pl?gene=NCF2  
p.pl?gene=CYBA  
p.pl?gene=LPIN2  
p.pl?gene=STAT1  
p.pl?gene=NCF1  
p.pl?gene=CD40LG  
p.pl?gene=MPO  
p.pl?gene=CRP  
p.pl?gene=STAT3  
p.pl?gene=CXCL8  
p.pl?gene=NOD2  
p.pl?gene=SPTLC1  
p.pl?gene=ADA  
p.pl?gene=NCF4  
p.pl?gene=CD79A  
p.pl?gene=IL13  
p.pl?gene=ACE  
p.pl?gene=MEFV  
p.pl?gene=TGFB1  
p.pl?gene=ALPL  
p.pl?gene=IL4  
p.pl?gene=BCR  
p.pl?gene=CCR5  
p.pl?gene=BDNF  
p.pl?gene=CTLA4  
p.pl?gene=ACP5  
p.pl?gene=F2  
p.pl?gene=INS  
p.pl?gene=NTRK1  
p.pl?gene=PSTPIP1  
p.pl?gene=IFNGR1  
p.pl?gene=IL2RA  
p.pl?gene=SPTLC2  
p.pl?gene=NGF  
p.pl?gene=ABCB1  
p.pl?gene=CCL2  
p.pl?gene=CSF3  
p.pl?gene=SOD1  
p.pl?gene=SETBP1  
p.pl?gene=FOXP3  
p.pl?gene=NRAS  
p.pl?gene=ITGAM  
p.pl?gene=HRAS  
p.pl?gene=MECOM  
p.pl?gene=TLR2  
p.pl?gene=CLCN7

p.pl?gene=NOS3  
p.pl?gene=TTR  
p.pl?gene=RETREG1  
p.pl?gene=BTK  
p.pl?gene=PRTN3  
p.pl?gene=CCL5  
p.pl?gene=B2M  
p.pl?gene=MBL2  
p.pl?gene=ANO5  
p.pl?gene=G6PD  
p.pl?gene=COMT  
p.pl?gene=MMP9  
p.pl?gene=ALB  
p.pl?gene=HBB  
p.pl?gene=ELN  
p.pl?gene=TLR5  
p.pl?gene=IL17A  
p.pl?gene=IL1A  
p.pl?gene=MIR142  
p.pl?gene=IGHM  
p.pl?gene=HLA-B  
p.pl?gene=CASP1  
p.pl?gene=CXCL10  
p.pl?gene=STAT5B  
p.pl?gene=HLA-DRB1  
p.pl?gene=CALCA  
p.pl?gene=TCIRG1  
p.pl?gene=CSF2  
p.pl?gene=CTSK  
p.pl?gene=ELANE  
p.pl?gene=FCGR2A  
p.pl?gene=SH3TC2  
p.pl?gene=AIRE  
p.pl?gene=HMOX1  
p.pl?gene=TNFRSF1B  
p.pl?gene=TNFRSF11B  
p.pl?gene=APOE  
p.pl?gene=CXCR4  
p.pl?gene=MT-CYB  
p.pl?gene=ITGB2  
p.pl?gene=SCN9A  
p.pl?gene=BRAF  
p.pl?gene=JAK3  
p.pl?gene=COL1A1  
p.pl?gene=DNMT1  
p.pl?gene=MIR21  
p.pl?gene=MMP1  
p.pl?gene=BGLAP  
p.pl?gene=MIR223  
p.pl?gene=WNK1  
p.pl?gene=CD28  
p.pl?gene=POLG  
p.pl?gene=PIK3R1  
p.pl?gene=IL2  
p.pl?gene=DNMT3A  
p.pl?gene=MPV17  
p.pl?gene=CAT  
p.pl?gene=FCGR3B

p.pl?gene=CD79B  
p.pl?gene=CCR6  
p.pl?gene=XK  
p.pl?gene=CD4  
p.pl?gene=IL12RB1  
p.pl?gene=MFN2  
p.pl?gene=TBX21  
p.pl?gene=MPZ  
p.pl?gene=NOS2  
p.pl?gene=ICAM1  
p.pl?gene=PYCARD  
p.pl?gene=VDR  
p.pl?gene=EPO  
p.pl?gene=DCTN1  
p.pl?gene=IL18  
p.pl?gene=GJB1  
p.pl?gene=HLA-DQB1  
p.pl?gene=BMP2  
p.pl?gene=TLR9  
p.pl?gene=DOCK8  
p.pl?gene=PIK3CA  
p.pl?gene=VEGFA  
p.pl?gene=ATP7A  
p.pl?gene=SNCA  
p.pl?gene=FGA  
p.pl?gene=LRP5  
p.pl?gene=PRF1  
p.pl?gene=CLEC7A  
p.pl?gene=IRF5  
p.pl?gene=APOA1  
p.pl?gene=EDN1  
p.pl?gene=FBN1  
p.pl?gene=MYC  
p.pl?gene=CARD9  
p.pl?gene=WAS  
p.pl?gene=STAT4  
p.pl?gene=RAC2  
p.pl?gene=CD8A  
p.pl?gene=ATL3  
p.pl?gene=TNFRSF13C  
p.pl?gene=AKT1  
p.pl?gene=MTHFR  
p.pl?gene=TF  
p.pl?gene=PLEKHM1  
p.pl?gene=LTF  
p.pl?gene=RAB7A  
p.pl?gene=IL7R  
p.pl?gene=GBA  
p.pl?gene=CCL27  
p.pl?gene=MRAP  
p.pl?gene=ARSA  
p.pl?gene=KIF1A  
p.pl?gene=APOL1  
p.pl?gene=ATL1  
p.pl?gene=HP  
p.pl?gene=BCL10  
p.pl?gene=LACC1  
p.pl?gene=PKLR



p.pl?gene=PGM3  
p.pl?gene=NPPB  
p.pl?gene=SRC  
p.pl?gene=GLA  
p.pl?gene=IL10RA  
p.pl?gene=MGP  
p.pl?gene=PSAP  
p.pl?gene=SAA1  
p.pl?gene=NEFL  
p.pl?gene=CD40  
p.pl?gene=FBLIM1  
p.pl?gene=H2AC18  
p.pl?gene=MIR16-1  
p.pl?gene=GDAP1  
p.pl?gene=SELP  
p.pl?gene=TNFRSF11A  
p.pl?gene=PTGS2  
p.pl?gene=BLNK  
p.pl?gene=FLVCR1  
p.pl?gene=VCAM1  
p.pl?gene=CCT5  
p.pl?gene=CD36  
p.pl?gene=CD34  
p.pl?gene=TNFSF13B  
p.pl?gene=KIF1B  
p.pl?gene=NFKB1  
p.pl?gene=TCF3  
p.pl?gene=CYBC1  
p.pl?gene=PRKN  
p.pl?gene=RELCH  
p.pl?gene=CSF1  
p.pl?gene=STAT5A  
p.pl?gene=IGHMBP2  
p.pl?gene=SERPINA3  
p.pl?gene=GARS1  
p.pl?gene=HECTD4  
p.pl?gene=KITLG  
p.pl?gene=LOX  
p.pl?gene=IL36RN  
p.pl?gene=ICOSLG  
p.pl?gene=DNAH8  
p.pl?gene=CASP8  
p.pl?gene=SELL  
p.pl?gene=LOC110806263  
p.pl?gene=NAA50  
p.pl?gene=HEXA  
p.pl?gene=CCR7  
p.pl?gene=HSPA4  
p.pl?gene=TNFRSF1A  
p.pl?gene=SOST  
p.pl?gene=LACTB  
p.pl?gene=RNASE3  
p.pl?gene=KMT2A  
p.pl?gene=SELE  
p.pl?gene=COL1A2  
p.pl?gene=SLC17A5  
p.pl?gene=OCRL  
p.pl?gene=CCN2

p.pl?gene=DUOX2  
p.pl?gene=CYCS  
p.pl?gene=UGT1A1  
p.pl?gene=LRRC8A  
p.pl?gene=BAX  
p.pl?gene=ITGAX  
p.pl?gene=CPT1B  
p.pl?gene=NFKB2  
p.pl?gene=DZIP1L  
p.pl?gene=PSTPIP2  
p.pl?gene=CHI3L1  
p.pl?gene=IGF2R  
p.pl?gene=HSP90AA1  
p.pl?gene=SLC5A1  
p.pl?gene=SST  
p.pl?gene=CCND2  
p.pl?gene=IGLL1  
p.pl?gene=BSCL2  
p.pl?gene=ITGAL  
p.pl?gene=TPI1  
p.pl?gene=LIG4  
p.pl?gene=CXCL12  
p.pl?gene=CD14  
p.pl?gene=SETX  
p.pl?gene=LRBA  
p.pl?gene=NCF4-AS1  
p.pl?gene=LYN  
p.pl?gene=CTSG  
p.pl?gene=SFTPD  
p.pl?gene=IL15  
p.pl?gene=PRDM16  
p.pl?gene=PRL  
p.pl?gene=DEFB4A  
p.pl?gene=MIRLET7D  
p.pl?gene=IL1RAPL2  
p.pl?gene=BMPR2  
p.pl?gene=PLCG2  
p.pl?gene=S100A9  
p.pl?gene=SLC29A3  
p.pl?gene=DUOX1  
p.pl?gene=HMGB1  
p.pl?gene=CXCL9  
p.pl?gene=ITGA4  
p.pl?gene=ELP1  
p.pl?gene=SYK  
p.pl?gene=ANXA5  
p.pl?gene=MMP8  
p.pl?gene=CCK  
p.pl?gene=VWF  
p.pl?gene=ITGB3  
p.pl?gene=NOX1  
p.pl?gene=CP  
p.pl?gene=ABCC1  
p.pl?gene=MAPK14  
p.pl?gene=IDO1  
p.pl?gene=HSPD1  
p.pl?gene=CYP1B1  
p.pl?gene=EGFR

p.pl?gene=RASGRP1  
p.pl?gene=IFNB1  
p.pl?gene=ATP6V1B1  
p.pl?gene=LOC106029312  
p.pl?gene=BMP6  
p.pl?gene=CHIT1  
p.pl?gene=SCARB2  
p.pl?gene=CXCR2  
p.pl?gene=GALC  
p.pl?gene=CCL4  
p.pl?gene=SLC11A1  
p.pl?gene=HBG2  
p.pl?gene=UNG  
p.pl?gene=IL1R1  
p.pl?gene=PTK2B  
p.pl?gene=CUBN  
p.pl?gene=FCGR3A  
p.pl?gene=PGK1  
p.pl?gene=TLR1  
p.pl?gene=ATP7B  
p.pl?gene=ALG3  
p.pl?gene=IKBK  
p.pl?gene=NAGLU  
p.pl?gene=AICDA  
p.pl?gene=GAST  
p.pl?gene=CD27  
p.pl?gene=GAN  
p.pl?gene=PPP3CA  
p.pl?gene=PLAT  
p.pl?gene=CR1  
p.pl?gene=PMM2  
p.pl?gene=SLC12A6  
p.pl?gene=LITAF  
p.pl?gene=KEL  
p.pl?gene=PDGFB  
p.pl?gene=GABBR2  
p.pl?gene=IGH  
p.pl?gene=SPTLC3  
p.pl?gene=RAG1  
p.pl?gene=PMP2  
p.pl?gene=RAC1  
p.pl?gene=IL6R  
p.pl?gene=LPA  
p.pl?gene=IL23A  
p.pl?gene=SLCO2A1  
p.pl?gene=SIGLEC5  
p.pl?gene=SNX10  
p.pl?gene=HABP2  
p.pl?gene=SLC2A10  
p.pl?gene=SDSL  
p.pl?gene=GH1  
p.pl?gene=TLR10  
p.pl?gene=AP1S3  
p.pl?gene=DBH  
p.pl?gene=ALK  
p.pl?gene=GSR  
p.pl?gene=GPNMB  
p.pl?gene=F5

p.pl?gene=FGD4  
p.pl?gene=OSTM1  
p.pl?gene=KRTCAP2  
p.pl?gene=TPO  
p.pl?gene=CTEPH1  
p.pl?gene=CFP  
p.pl?gene=CALCR  
p.pl?gene=F3  
p.pl?gene=OTC  
p.pl?gene=ITGAE  
p.pl?gene=DNAJB11  
p.pl?gene=CORO1A  
p.pl?gene=CSF1R  
p.pl?gene=LMO2  
p.pl?gene=LCAT  
p.pl?gene=MIR30A  
p.pl?gene=CA2  
p.pl?gene=NCF1C  
p.pl?gene=CPLANE2  
p.pl?gene=ENTPD1  
p.pl?gene=IL12B  
p.pl?gene=KNG1  
p.pl?gene=RAP1A  
p.pl?gene=DNM2  
p.pl?gene=CXCL2  
p.pl?gene=LAG3  
p.pl?gene=HRH2  
p.pl?gene=CD163  
p.pl?gene=TOP1  
p.pl?gene=ERCC6  
p.pl?gene=CYP17A1  
p.pl?gene=RTN4  
p.pl?gene=NOX4  
p.pl?gene=MMP13  
p.pl?gene=NGFR  
p.pl?gene=DEFB1  
p.pl?gene=CXCR1  
p.pl?gene=NTRK2  
p.pl?gene=SPTSSB  
p.pl?gene=BAMBI  
p.pl?gene=MIR19B1  
p.pl?gene=PLEK  
p.pl?gene=GPX1  
p.pl?gene=STX11  
p.pl?gene=BPI  
p.pl?gene=PLAUR  
p.pl?gene=CCL18  
p.pl?gene=KRT8  
p.pl?gene=C4B  
p.pl?gene=NOX5  
p.pl?gene=NCF1B  
p.pl?gene=CTSB  
p.pl?gene=TPT1  
p.pl?gene=COG7  
p.pl?gene=CTDSPL  
p.pl?gene=IDNK  
p.pl?gene=SPTSSA  
p.pl?gene=MLN

p.pl?gene=SPARC  
p.pl?gene=ADCYAP1  
p.pl?gene=SMPD1  
p.pl?gene=SH2D1A  
p.pl?gene=DECR1  
p.pl?gene=HBA1  
p.pl?gene=CLEC11A  
p.pl?gene=RAB5A  
p.pl?gene=MVK  
p.pl?gene=CYP19A1  
p.pl?gene=STT3B  
p.pl?gene=SP1  
p.pl?gene=CLTCL1  
p.pl?gene=GPX2  
p.pl?gene=HSN1B  
p.pl?gene=HTATIP2  
p.pl?gene=ALPI  
p.pl?gene=CYP3A4  
p.pl?gene=ITK  
p.pl?gene=KCNJ1  
p.pl?gene=CSN1S1  
p.pl?gene=CLEC6A  
p.pl?gene=HBA2  
p.pl?gene=GABBR1  
p.pl?gene=MRC1  
p.pl?gene=RPN2  
p.pl?gene=RAB7B  
p.pl?gene=LIG3  
p.pl?gene=LRP2  
p.pl?gene=ETS1  
p.pl?gene=REG1A  
p.pl?gene=RPN1  
p.pl?gene=CTSD  
p.pl?gene=MTMR2  
p.pl?gene=MITF  
p.pl?gene=STT3A  
p.pl?gene=FANCF  
p.pl?gene=TRAF6  
p.pl?gene=ITM2B  
p.pl?gene=ENPP6  
p.pl?gene=DNAJB5  
p.pl?gene=BCL11A  
p.pl?gene=GRN  
p.pl?gene=PMM1  
p.pl?gene=HPSE2  
p.pl?gene=SLC17A6  
p.pl?gene=CD1A  
p.pl?gene=PPP1R12C  
p.pl?gene=RILP  
p.pl?gene=IRAK3  
p.pl?gene=CDKAL1  
p.pl?gene=CHKB  
p.pl?gene=ABCC4  
p.pl?gene=MASP2  
p.pl?gene=DDOST  
p.pl?gene=TNFRSF18  
p.pl?gene=CENPB  
p.pl?gene=CHIA

p.pl?gene=LAMP1  
p.pl?gene=SLC7A8  
p.pl?gene=ALG6  
p.pl?gene=NFATC1  
p.pl?gene=CLEC4E  
p.pl?gene=PRH1  
p.pl?gene=PRH2  
p.pl?gene=DEFA5  
p.pl?gene=UGCG  
p.pl?gene=NELL1  
p.pl?gene=CBSL  
p.pl?gene=SSB  
p.pl?gene=SUPT6H  
p.pl?gene=DUS2  
p.pl?gene=SBF2  
p.pl?gene=AIF1  
p.pl?gene=TFE3  
p.pl?gene=KIF5A  
p.pl?gene=TFF3  
p.pl?gene=SAA4  
p.pl?gene=TRIM21  
p.pl?gene=TREM1  
p.pl?gene=ZC3H11A  
p.pl?gene=DUOXA2  
p.pl?gene=TNFRSF8  
p.pl?gene=TRH  
p.pl?gene=SERPINF2  
p.pl?gene=BLOC1S1  
p.pl?gene=DEFA1  
p.pl?gene=ARSH  
p.pl?gene=IMPDH1  
p.pl?gene=SELPLG  
p.pl?gene=FUT4  
p.pl?gene=MT-RNR2  
p.pl?gene=HBG1  
p.pl?gene=ATP6V0A4  
p.pl?gene=MYNN  
p.pl?gene=FOXP2  
p.pl?gene=ACKR1  
p.pl?gene=COMP  
p.pl?gene=LYZ  
p.pl?gene=C1S  
p.pl?gene=PROCR  
p.pl?gene=FSCN1  
p.pl?gene=ERF  
p.pl?gene=STK39  
p.pl?gene=SPON1  
p.pl?gene=MIPEP  
p.pl?gene=HBD  
p.pl?gene=DACT1  
p.pl?gene=TXK  
p.pl?gene=SLC5A2  
p.pl?gene=HDC  
p.pl?gene=CD1C  
p.pl?gene=FERMT1  
p.pl?gene=ICAM2  
p.pl?gene=UGT1A6  
p.pl?gene=CPB2

p.pl?gene=LAPTM4A  
p.pl?gene=LINC01094  
p.pl?gene=UGT1A8  
p.pl?gene=MIR24-1  
p.pl?gene=ACYP2  
p.pl?gene=LAMP2  
p.pl?gene=NANOG  
p.pl?gene=PRKAG2  
p.pl?gene=CSK  
p.pl?gene=GBA2  
p.pl?gene=PRICKLE4  
p.pl?gene=THBS4  
p.pl?gene=ATP5F1A  
p.pl?gene=SLC22A6  
p.pl?gene=CD1E  
p.pl?gene=MT-TF  
p.pl?gene=LBP  
p.pl?gene=HBS1L  
p.pl?gene=CEACAM8  
p.pl?gene=CABIN1  
p.pl?gene=CLEC4D  
p.pl?gene=ZBTB46  
p.pl?gene=PRDM12  
p.pl?gene=FBX  
p.pl?gene=BDKRB2  
p.pl?gene=VAV3  
p.pl?gene=CCS  
p.pl?gene=LOC112872299  
p.pl?gene=RO60  
p.pl?gene=BMX  
p.pl?gene=SH3BP5  
p.pl?gene=SLC35C1  
p.pl?gene=SLC12A5  
p.pl?gene=LCOR  
p.pl?gene=TFEB  
p.pl?gene=SCG2  
p.pl?gene=OMP  
p.pl?gene=HSD3B1  
p.pl?gene=BYSL  
p.pl?gene=ITGA2  
p.pl?gene=CHKA  
p.pl?gene=SLCO4A1  
p.pl?gene=SLC12A2  
p.pl?gene=FLVCR2  
p.pl?gene=FERMT3  
p.pl?gene=FCRL6  
p.pl?gene=CGB3  
p.pl?gene=POLR2B  
p.pl?gene=COMMD1  
p.pl?gene=HOXD13  
p.pl?gene=CD1B  
p.pl?gene=LY96  
p.pl?gene=SNRNP70  
p.pl?gene=TEC  
p.pl?gene=MTX1  
p.pl?gene=PLOD2  
p.pl?gene=OR51B5  
p.pl?gene=OR51B6



p.pl?gene=NR1H3  
p.pl?gene=SP3  
p.pl?gene=RGS10  
p.pl?gene=SLC6A19  
p.pl?gene=ITGAD  
p.pl?gene=GOLPH3  
p.pl?gene=LRRK1  
p.pl?gene=MTAP  
p.pl?gene=CCDC154  
p.pl?gene=DEFB105A  
p.pl?gene=DEFB105B  
p.pl?gene=DIPK1C  
p.pl?gene=BLZF1  
p.pl?gene=IL19  
p.pl?gene=ATOX1  
p.pl?gene=CLN8  
p.pl?gene=SLC31A1  
p.pl?gene=TSSK1B  
p.pl?gene=AGMX2  
p.pl?gene=TLN1  
p.pl?gene=DEFB103B  
p.pl?gene=RASGRP2  
p.pl?gene=METAP2  
p.pl?gene=RECQL4  
p.pl?gene=NINJ1  
p.pl?gene=B4GALNT2  
p.pl?gene=ELP3  
p.pl?gene=TRAT1  
p.pl?gene=ALLC  
p.pl?gene=SAA2  
p.pl?gene=SPART  
p.pl?gene=ZNF169  
p.pl?gene=NFIL3  
p.pl?gene=FERMT2  
p.pl?gene=BDNF-AS  
p.pl?gene=APBB1IP  
p.pl?gene=CNOT8  
p.pl?gene=SLCO1C1  
p.pl?gene=ZNF2  
p.pl?gene=DOP1A  
p.pl?gene=LOC106627981  
p.pl?gene=HPGD  
p.pl?gene=IBSP  
p.pl?gene=FBXO32  
p.pl?gene=ZBTB38  
p.pl?gene=LTB4R  
p.pl?gene=PLB1  
p.pl?gene=ZHX2  
p.pl?gene=SAMM50  
p.pl?gene=GAS2  
p.pl?gene=GBA3  
p.pl?gene=CGB7  
p.pl?gene=CCT4  
p.pl?gene=TRDMT1  
p.pl?gene=TUB  
p.pl?gene=DNMT3L  
p.pl?gene=THBS3  
p.pl?gene=METAP1

p.pl?gene=SLC6A18  
p.pl?gene=CLTRN  
p.pl?gene=HSFX1  
p.pl?gene=HSFX2  
p.pl?gene=LOC102724153  
p.pl?gene=CYP4F3  
p.pl?gene=SLC6A5  
p.pl?gene=TRIM63  
p.pl?gene=IL20  
p.pl?gene=IGSF3  
p.pl?gene=IRAK4  
p.pl?gene=CTSH  
p.pl?gene=ATP6V0A2  
p.pl?gene=ACP3  
p.pl?gene=CXCR6  
p.pl?gene=WNT11  
p.pl?gene=SNRPA  
p.pl?gene=EPHX2  
p.pl?gene=MASP1  
p.pl?gene=MT2A  
p.pl?gene=ESD  
p.pl?gene=HTN3  
p.pl?gene=LPIN1  
p.pl?gene=CEACAM4  
p.pl?gene=DNM3  
p.pl?gene=STOML2  
p.pl?gene=ATP6V0E2  
p.pl?gene=RNF115  
p.pl?gene=UHRF2  
p.pl?gene=WNK4  
p.pl?gene=INTS8  
p.pl?gene=RASGRF1  
p.pl?gene=EXOSC10  
p.pl?gene=MAP3K15  
p.pl?gene=CGB8  
p.pl?gene=EPS15  
p.pl?gene=PTGES3  
p.pl?gene=GJB3  
p.pl?gene=GPD1  
p.pl?gene=PGAM1  
p.pl?gene=PTGES2  
p.pl?gene=TCP1  
p.pl?gene=MTERF1  
p.pl?gene=MTF1  
p.pl?gene=C11orf58  
p.pl?gene=GALNT3  
p.pl?gene=C4BPB  
p.pl?gene=C4BPA  
p.pl?gene=WNT6
