# Supplementary material for: Network Pharmacology-Based Analysis on Lonicera japonica for Chronic Osteomyelitis Treatment
Source: Hindawi journal article supplement (doi:10.1155/2022/1706716), 2022-01-24
Supplement: f1 [file 1706716.f1.zip]

| MolId     | MolName    | Target                                                | Symbol  |
|-----------|------------|-------------------------------------------------------|---------|
| MOL003044 | Chryseriol | Nitric oxide synthase, inducible                      | NOS2    |
| MOL003044 | Chryseriol | Prostaglandin G/H synthase 1                          | PTGS1   |
| MOL003044 | Chryseriol | Estrogen receptor                                     | ESR1    |
| MOL003044 | Chryseriol | Androgen receptor                                     | AR      |
| MOL003044 | Chryseriol | Peroxisome proliferator activated receptor gamma      | PPARG   |
| MOL003044 | Chryseriol | Prostaglandin G/H synthase 2                          | PTGS2   |
| MOL003044 | Chryseriol | Mitogen-activated protein kinase 14                   | MAPK14  |
| MOL003044 | Chryseriol | Glycogen synthase kinase-3 beta                       | GSK3B   |
| MOL003044 | Chryseriol | Serine/threonine-protein kinase Chk1                  | CHEK1   |
| MOL003044 | Chryseriol | Trypsin-1                                             | PRSS1   |
| MOL003044 | Chryseriol | Nuclear receptor coactivator 2                        | NCOA2   |
| MOL003044 | Chryseriol | Nuclear receptor coactivator 1                        | NCOA1   |
| MOL000006 | luteolin   | Prostaglandin G/H synthase 1                          | PTGS1   |
| MOL000006 | luteolin   | Androgen receptor                                     | AR      |
| MOL000006 | luteolin   | Prostaglandin G/H synthase 2                          | PTGS2   |
| MOL000006 | luteolin   | Trypsin-1                                             | PRSS1   |
| MOL000006 | luteolin   | Nuclear receptor coactivator 2                        | NCOA2   |
| MOL000006 | luteolin   | Transcription factor p65                              | RELA    |
| MOL000006 | luteolin   | Epidermal growth factor receptor                      | EGFR    |
| MOL000006 | luteolin   | RAC-alpha serine/threonine-protein kinase             | AKT1    |
| MOL000006 | luteolin   | Vascular endothelial growth factor A                  | VEGFA   |
| MOL000006 | luteolin   | G1/S-specific cyclin-D1                               | CCND1   |
| MOL000006 | luteolin   | Bcl-2-like protein 1                                  | BCL2L1  |
| MOL000006 | luteolin   | Cyclin-dependent kinase inhibitor 1                   | CDKN1A  |
| MOL000006 | luteolin   | Caspase-9                                             | CASP9   |
| MOL000006 | luteolin   | 72 kDa type IV collagenase                            | MMP2    |
| MOL000006 | luteolin   | Matrix metalloproteinase-9                            | MMP9    |
| MOL000006 | luteolin   | Mitogen-activated protein kinase 1                    | MAPK1   |
| MOL000006 | luteolin   | Interleukin-10                                        | IL10    |
| MOL000006 | luteolin   | Retinoblastoma-associated protein                     | RB1     |
| MOL000006 | luteolin   | Tumor necrosis factor                                 | TNFSF15 |
| MOL000006 | luteolin   | Transcription factor AP-1                             | JUN     |
| MOL000006 | luteolin   | Interleukin-6                                         | IL6     |
| MOL000006 | luteolin   | Caspase-3                                             | CASP3   |
| MOL000006 | luteolin   | Cellular tumor antigen p53                            | TP63    |
| MOL000006 | luteolin   | NF-kappa-B inhibitor alpha                            | NFKBIA  |
| MOL000006 | luteolin   | DNA topoisomerase 1                                   | TOP1    |
| MOL000006 | luteolin   | E3 ubiquitin-protein ligase Mdm2                      | MDM2    |
| MOL000006 | luteolin   | Amyloid beta A4 protein                               | APP     |
| MOL000006 | luteolin   | Interstitial collagenase                              | MMP1    |
| MOL000006 | luteolin   | Proliferating cell nuclear antigen                    | PCNA    |
| MOL000006 | luteolin   | Receptor tyrosine-protein kinase erbB-2               | ERBB2   |
| MOL000006 | luteolin   | Peroxisome proliferator-activated receptor gamma      | PPARG   |
| MOL000006 | luteolin   | Heme oxygenase 1                                      | HMOX1   |
| MOL000006 | luteolin   | Caspase-7                                             | CASP7   |
| MOL000006 | luteolin   | Intercellular adhesion molecule 1                     | ICAM1   |
| MOL000006 | luteolin   | Induced myeloid leukemia cell differentiation protein | MCL1    |
| MOL000006 | luteolin   | Baculoviral IAP repeat-containing protein 5           | BIRC5   |
| MOL000006 | luteolin   | Interleukin-2                                         | IL2     |
| MOL000006 | luteolin   | G2/mitotic-specific cyclin-B1                         | CCNB1   |

|           |              |                                                     |        |
|-----------|--------------|-----------------------------------------------------|--------|
| MOL000006 | luteolin     | Tyrosinase                                          | TYR    |
| MOL000006 | luteolin     | Interferon gamma                                    | IFNG   |
| MOL000006 | luteolin     | Interleukin-4                                       | IL4    |
| MOL000006 | luteolin     | DNA topoisomerase 2-alpha                           | TOP2A  |
| MOL000006 | luteolin     | Glutathione S-transferase P                         | GSTP1  |
| MOL000006 | luteolin     | Solute carrier family 2, facilitated glucose transp | SLC2A4 |
| MOL000006 | luteolin     | Insulin receptor                                    | INSR   |
| MOL000006 | luteolin     | CD40 ligand                                         | CD40LG |
| MOL000006 | luteolin     | Prostaglandin E synthase                            | PTGES  |
| MOL000006 | luteolin     | Kinetochore protein Nuf2                            | NUF2   |
| MOL000006 | luteolin     | Adenylate cyclase type 2                            | ADCY2  |
| MOL000006 | luteolin     | Hepatocyte growth factor receptor                   | MET    |
| MOL000358 | beta-sitoste | Progesterone receptor                               | PGR    |
| MOL000358 | beta-sitoste | Nuclear receptor coactivator 2                      | NCOA2  |
| MOL000358 | beta-sitoste | Prostaglandin G/H synthase 1                        | PTGS1  |
| MOL000358 | beta-sitoste | Prostaglandin G/H synthase 2                        | PTGS2  |
| MOL000358 | beta-sitoste | Potassium voltage-gated channel subfamily H member  | KCNH2  |
| MOL000358 | beta-sitoste | Muscarinic acetylcholine receptor M3                | CHRM3  |
| MOL000358 | beta-sitoste | Muscarinic acetylcholine receptor M1                | CHRM1  |
| MOL000358 | beta-sitoste | Sodium channel protein type 5 subunit alpha         | SCN5A  |
| MOL000358 | beta-sitoste | Muscarinic acetylcholine receptor M4                | CHRM4  |
| MOL000358 | beta-sitoste | Alpha-1A adrenergic receptor                        | ADRA1A |
| MOL000358 | beta-sitoste | Muscarinic acetylcholine receptor M2                | CHRM2  |
| MOL000358 | beta-sitoste | Alpha-1B adrenergic receptor                        | ADRA1B |
| MOL000358 | beta-sitoste | Beta-2 adrenergic receptor                          | ADRB2  |
| MOL000358 | beta-sitoste | Neuronal acetylcholine receptor subunit alpha-2     | CHRNA2 |
| MOL000358 | beta-sitoste | Sodium-dependent serotonin transporter              | SLC6A4 |
| MOL000358 | beta-sitoste | Mu-type opioid receptor                             | OPRM1  |
| MOL000358 | beta-sitoste | Gamma-aminobutyric acid receptor subunit alpha-1    | GABRA1 |
| MOL000358 | beta-sitoste | Apoptosis regulator Bcl-2                           | BCL2   |
| MOL000358 | beta-sitoste | Apoptosis regulator BAX                             | BAX    |
| MOL000358 | beta-sitoste | Caspase-9                                           | CASP9  |
| MOL000358 | beta-sitoste | Transcription factor AP-1                           | JUN    |
| MOL000358 | beta-sitoste | Caspase-3                                           | CASP3  |
| MOL000358 | beta-sitoste | Caspase-8                                           | CASP8  |
| MOL000358 | beta-sitoste | Protein kinase C alpha type                         | PRKCA  |
| MOL000358 | beta-sitoste | Serum paraoxonase/arylesterase 1                    | PON1   |
| MOL000358 | beta-sitoste | Microtubule-associated protein 2                    | MAP2   |
| MOL002773 | beta-caroten | RAC-alpha serine/threonine-protein kinase           | AKT1   |
| MOL002773 | beta-caroten | Vascular endothelial growth factor A                | VEGFA  |
| MOL002773 | beta-caroten | Apoptosis regulator Bcl-2                           | BCL2   |
| MOL002773 | beta-caroten | Caspase-9                                           | CASP9  |
| MOL002773 | beta-caroten | 72 kDa type IV collagenase                          | MMP2   |
| MOL002773 | beta-caroten | Transcription factor AP-1                           | JUN    |
| MOL002773 | beta-caroten | Caspase-3                                           | CASP3  |
| MOL002773 | beta-caroten | Prostaglandin G/H synthase 2                        | PTGS2  |
| MOL002773 | beta-caroten | Caspase-8                                           | CASP8  |
| MOL002773 | beta-caroten | Interstitial collagenase                            | MMP1   |
| MOL002773 | beta-caroten | Heme oxygenase 1                                    | HMOX1  |
| MOL002773 | beta-caroten | Cytochrome P450 3A4                                 | CYP3A4 |
| MOL002773 | beta-caroten | Cytochrome P450 1A2                                 | CYP1A2 |

|           |               |                                                       |         |
|-----------|---------------|-------------------------------------------------------|---------|
| MOL002773 | beta-carotene | Serum albumin                                         | ALB     |
| MOL002773 | beta-carotene | Caveolin-1                                            | CAV1    |
| MOL002773 | beta-carotene | Catenin beta-1                                        | CTNNB1  |
| MOL002773 | beta-carotene | Myc proto-oncogene protein                            | MYC     |
| MOL002773 | beta-carotene | Caspase-7                                             | CASP7   |
| MOL002773 | beta-carotene | Tissue factor                                         | F3      |
| MOL002773 | beta-carotene | Gap junction alpha-1 protein                          | GJA1    |
| MOL002773 | beta-carotene | Stromelysin-2                                         | MMP10   |
| MOL002914 | Eriodyctiol   | Prostaglandin G/H synthase 1                          | PTGS1   |
| MOL002914 | Eriodyctiol   | Prostaglandin G/H synthase 2                          | PTGS2   |
| MOL002914 | Eriodyctiol   | Nuclear receptor coactivator 2                        | NCOA2   |
| MOL002914 | Eriodyctiol   | Glycogen phosphorylase, muscle form                   | PYGM    |
| MOL000422 | kaempferol    | Nitric oxide synthase, inducible                      | NOS2    |
| MOL000422 | kaempferol    | Prostaglandin G/H synthase 1                          | PTGS1   |
| MOL000422 | kaempferol    | Androgen receptor                                     | AR      |
| MOL000422 | kaempferol    | Peroxisome proliferator activated receptor gamma      | PPARG   |
| MOL000422 | kaempferol    | Prostaglandin G/H synthase 2                          | PTGS2   |
| MOL000422 | kaempferol    | Nuclear receptor coactivator 2                        | NCOA2   |
| MOL000422 | kaempferol    | Trypsin-1                                             | PRSS1   |
| MOL000422 | kaempferol    | Progesterone receptor                                 | PGR     |
| MOL000422 | kaempferol    | Muscarinic acetylcholine receptor M1                  | CHRM1   |
| MOL000422 | kaempferol    | Acetylcholinesterase                                  | ACHE    |
| MOL000422 | kaempferol    | Sodium-dependent noradrenaline transporter            | SLC6A2  |
| MOL000422 | kaempferol    | Muscarinic acetylcholine receptor M2                  | CHRM2   |
| MOL000422 | kaempferol    | Alpha-1B adrenergic receptor                          | ADRA1B  |
| MOL000422 | kaempferol    | Gamma-aminobutyric acid receptor subunit alpha-1      | GABRA1  |
| MOL000422 | kaempferol    | Coagulation factor VII                                | F7      |
| MOL000422 | kaempferol    | Transcription factor p65                              | RELA    |
| MOL000422 | kaempferol    | Inhibitor of nuclear factor kappa-B kinase subunit    | IKBKB   |
| MOL000422 | kaempferol    | RAC-alpha serine/threonine-protein kinase             | AKT1    |
| MOL000422 | kaempferol    | Apoptosis regulator Bcl-2                             | BCL2    |
| MOL000422 | kaempferol    | Apoptosis regulator BAX                               | BAX     |
| MOL000422 | kaempferol    | Tumor necrosis factor                                 | TNFSF15 |
| MOL000422 | kaempferol    | Transcription factor AP-1                             | JUN     |
| MOL000422 | kaempferol    | Activator of 90 kDa heat shock protein ATPase homolog | AHSA1   |
| MOL000422 | kaempferol    | Caspase-3                                             | CASP3   |
| MOL000422 | kaempferol    | Mitogen-activated protein kinase 8                    | MAPK8   |
| MOL000422 | kaempferol    | Interstitial collagenase                              | MMP1    |
| MOL000422 | kaempferol    | Signal transducer and activator of transcription 1    | STAT1   |
| MOL000422 | kaempferol    | Peroxisome proliferator-activated receptor gamma      | PPARG   |
| MOL000422 | kaempferol    | Heme oxygenase 1                                      | HMOX1   |
| MOL000422 | kaempferol    | Cytochrome P450 3A4                                   | CYP3A4  |
| MOL000422 | kaempferol    | Cytochrome P450 1A2                                   | CYP1A2  |
| MOL000422 | kaempferol    | Cytochrome P450 1A1                                   | CYP1A1  |
| MOL000422 | kaempferol    | Intercellular adhesion molecule 1                     | ICAM1   |
| MOL000422 | kaempferol    | E-selectin                                            | SELE    |
| MOL000422 | kaempferol    | Vascular cell adhesion protein 1                      | VCAM1   |
| MOL000422 | kaempferol    | Nuclear receptor subfamily 1 group I member 2         | NR1I2   |
| MOL000422 | kaempferol    | Cytochrome P450 1B1                                   | CYP1B1  |
| MOL000422 | kaempferol    | Arachidonate 5-lipoxygenase                           | ALOX5   |
| MOL000422 | kaempferol    | Hyaluronan synthase 2                                 | HAS2    |

|           |               |                                                     |        |
|-----------|---------------|-----------------------------------------------------|--------|
| MOL000422 | kaempferol    | Glutathione S-transferase P                         | GSTP1  |
| MOL000422 | kaempferol    | Aryl hydrocarbon receptor                           | AHR    |
| MOL000422 | kaempferol    | 26S proteasome non-ATPase regulatory subunit 3      | PSMD3  |
| MOL000422 | kaempferol    | Solute carrier family 2, facilitated glucose transp | SLC2A4 |
| MOL000422 | kaempferol    | Nuclear receptor subfamily 1 group I member 3       | NR1I3  |
| MOL000422 | kaempferol    | Insulin receptor                                    | INSR   |
| MOL000422 | kaempferol    | Type I iodothyronine deiodinase                     | DIO1   |
| MOL000422 | kaempferol    | Serine/threonine-protein phosphatase 2B catalytic s | PPP3CA |
| MOL000422 | kaempferol    | Glutathione S-transferase Mu 1                      | GSTM1  |
| MOL000422 | kaempferol    | Glutathione S-transferase Mu 2                      | GSTM2  |
| MOL000422 | kaempferol    | Aldo-keto reductase family 1 member C3              | AKR1C3 |
| MOL000422 | kaempferol    | Antileukoprotease                                   | SLPI   |
| MOL001494 | Mandenol      | Prostaglandin G/H synthase 1                        | PTGS1  |
| MOL001494 | Mandenol      | Prostaglandin G/H synthase 2                        | PTGS2  |
| MOL001494 | Mandenol      | Nuclear receptor coactivator 2                      | NCOA2  |
| MOL003036 | ZINC03978781  | Progesterone receptor                               | PGR    |
| MOL003036 | ZINC03978781  | Nuclear receptor coactivator 2                      | NCOA2  |
| MOL003036 | ZINC03978781  | Mineralocorticoid receptor                          | NR3C2  |
| MOL000449 | Stigmasterol  | Progesterone receptor                               | PGR    |
| MOL000449 | Stigmasterol  | Mineralocorticoid receptor                          | NR3C2  |
| MOL000449 | Stigmasterol  | Nuclear receptor coactivator 2                      | NCOA2  |
| MOL000449 | Stigmasterol  | Alcohol dehydrogenase 1C                            | ADH1C  |
| MOL000449 | Stigmasterol  | Retinoic acid receptor RXR-alpha                    | RXRA   |
| MOL000449 | Stigmasterol  | Nuclear receptor coactivator 1                      | NCOA1  |
| MOL000449 | Stigmasterol  | Prostaglandin G/H synthase 1                        | PTGS1  |
| MOL000449 | Stigmasterol  | Prostaglandin G/H synthase 2                        | PTGS2  |
| MOL000449 | Stigmasterol  | Alpha-2A adrenergic receptor                        | ADRA2A |
| MOL000449 | Stigmasterol  | Sodium-dependent noradrenaline transporter          | SLC6A2 |
| MOL000449 | Stigmasterol  | Sodium-dependent dopamine transporter               | SLC6A3 |
| MOL000449 | Stigmasterol  | Beta-2 adrenergic receptor                          | ADRB2  |
| MOL000449 | Stigmasterol  | Aldose reductase                                    | AKR1B1 |
| MOL000449 | Stigmasterol  | Urokinase-type plasminogen activator                | PLAU   |
| MOL000449 | Stigmasterol  | Leukotriene A-4 hydrolase                           | LTA4H  |
| MOL000449 | Stigmasterol  | Amine oxidase [flavin-containing] B                 | MAOB   |
| MOL000449 | Stigmasterol  | Amine oxidase [flavin-containing] A                 | MAOA   |
| MOL000449 | Stigmasterol  | Chymotrypsinogen B                                  | CTRB1  |
| MOL000449 | Stigmasterol  | Muscarinic acetylcholine receptor M3                | CHRM3  |
| MOL000449 | Stigmasterol  | Muscarinic acetylcholine receptor M1                | CHRM1  |
| MOL000449 | Stigmasterol  | Beta-1 adrenergic receptor                          | ADRB1  |
| MOL000449 | Stigmasterol  | Sodium channel protein type 5 subunit alpha         | SCN5A  |
| MOL000449 | Stigmasterol  | Alpha-1A adrenergic receptor                        | ADRA1A |
| MOL000449 | Stigmasterol  | Muscarinic acetylcholine receptor M2                | CHRM2  |
| MOL000449 | Stigmasterol  | Alpha-1B adrenergic receptor                        | ADRA1B |
| MOL000449 | Stigmasterol  | Gamma-aminobutyric acid receptor subunit alpha-1    | GABRA1 |
| MOL001495 | Ethyl linolei | Prostaglandin G/H synthase 1                        | PTGS1  |
| MOL001495 | Ethyl linolei | Nuclear receptor coactivator 2                      | NCOA2  |
| MOL000098 | quercetin     | Prostaglandin G/H synthase 1                        | PTGS1  |
| MOL000098 | quercetin     | Androgen receptor                                   | AR     |
| MOL000098 | quercetin     | Peroxisome proliferator activated receptor gamma    | PPARG  |
| MOL000098 | quercetin     | Prostaglandin G/H synthase 2                        | PTGS2  |
| MOL000098 | quercetin     | Nuclear receptor coactivator 2                      | NCOA2  |

|           |           |                                                       |         |
|-----------|-----------|-------------------------------------------------------|---------|
| MOL000098 | quercetin | Aldose reductase                                      | AKR1B1  |
| MOL000098 | quercetin | Trypsin-1                                             | PRSS1   |
| MOL000098 | quercetin | Potassium voltage-gated channel subfamily H member    | KCNH2   |
| MOL000098 | quercetin | Sodium channel protein type 5 subunit alpha           | SCN5A   |
| MOL000098 | quercetin | Beta-2 adrenergic receptor                            | ADRB2   |
| MOL000098 | quercetin | Stromelysin-1                                         | MMP3    |
| MOL000098 | quercetin | Coagulation factor VII                                | F7      |
| MOL000098 | quercetin | Retinoic acid receptor RXR-alpha                      | RXRA    |
| MOL000098 | quercetin | Acetylcholinesterase                                  | ACHE    |
| MOL000098 | quercetin | Gamma-aminobutyric acid receptor subunit alpha-1      | GABRA1  |
| MOL000098 | quercetin | Amine oxidase [flavin-containing] B                   | MAOB    |
| MOL000098 | quercetin | Transcription factor p65                              | RELA    |
| MOL000098 | quercetin | Epidermal growth factor receptor                      | EGFR    |
| MOL000098 | quercetin | RAC-alpha serine/threonine-protein kinase             | AKT1    |
| MOL000098 | quercetin | Vascular endothelial growth factor A                  | VEGFA   |
| MOL000098 | quercetin | G1/S-specific cyclin-D1                               | CCND1   |
| MOL000098 | quercetin | Apoptosis regulator Bcl-2                             | BCL2    |
| MOL000098 | quercetin | Bcl-2-like protein 1                                  | BCL2L1  |
| MOL000098 | quercetin | Proto-oncogene c-Fos                                  | FOS     |
| MOL000098 | quercetin | Cyclin-dependent kinase inhibitor 1                   | CDKN1A  |
| MOL000098 | quercetin | Eukaryotic translation initiation factor 6            | EIF6    |
| MOL000098 | quercetin | Apoptosis regulator BAX                               | BAX     |
| MOL000098 | quercetin | Caspase-9                                             | CASP9   |
| MOL000098 | quercetin | Urokinase-type plasminogen activator                  | PLAU    |
| MOL000098 | quercetin | 72 kDa type IV collagenase                            | MMP2    |
| MOL000098 | quercetin | Matrix metalloproteinase-9                            | MMP9    |
| MOL000098 | quercetin | Mitogen-activated protein kinase 1                    | MAPK1   |
| MOL000098 | quercetin | Interleukin-10                                        | IL10    |
| MOL000098 | quercetin | Pro-epidermal growth factor                           | EGF     |
| MOL000098 | quercetin | Retinoblastoma-associated protein                     | RB1     |
| MOL000098 | quercetin | Tumor necrosis factor                                 | TNFSF15 |
| MOL000098 | quercetin | Transcription factor AP-1                             | JUN     |
| MOL000098 | quercetin | Interleukin-6                                         | IL6     |
| MOL000098 | quercetin | Activator of 90 kDa heat shock protein ATPase homolog | HAHSA1  |
| MOL000098 | quercetin | Caspase-3                                             | CASP3   |
| MOL000098 | quercetin | Cellular tumor antigen p53                            | TP63    |
| MOL000098 | quercetin | ETS domain-containing protein Elk-1                   | ELK1    |
| MOL000098 | quercetin | NF-kappa-B inhibitor alpha                            | NFKBIA  |
| MOL000098 | quercetin | NADPH--cytochrome P450 reductase                      | POR     |
| MOL000098 | quercetin | Ornithine decarboxylase                               | ODC1    |
| MOL000098 | quercetin | Caspase-8                                             | CASP8   |
| MOL000098 | quercetin | DNA topoisomerase 1                                   | TOP1    |
| MOL000098 | quercetin | RAF proto-oncogene serine/threonine-protein kinase    | RAF1    |
| MOL000098 | quercetin | Superoxide dismutase [Cu-Zn]                          | SOD1    |
| MOL000098 | quercetin | Protein kinase C alpha type                           | PRKCA   |
| MOL000098 | quercetin | Interstitial collagenase                              | MMP1    |
| MOL000098 | quercetin | Hypoxia-inducible factor 1-alpha                      | HIF1A   |
| MOL000098 | quercetin | Signal transducer and activator of transcription 1    | STAT1   |
| MOL000098 | quercetin | Protein CBFA2T1                                       | RUNX1T1 |
| MOL000098 | quercetin | Receptor tyrosine-protein kinase erbB-2               | ERBB2   |
| MOL000098 | quercetin | Peroxisome proliferator-activated receptor gamma      | PPARG   |

|           |           |                                                     |          |
|-----------|-----------|-----------------------------------------------------|----------|
| MOL000098 | quercetin | Acetyl-CoA carboxylase 1                            | ACACA    |
| MOL000098 | quercetin | Heme oxygenase 1                                    | HMOX1    |
| MOL000098 | quercetin | Cytochrome P450 3A4                                 | CYP3A4   |
| MOL000098 | quercetin | Cytochrome P450 1A2                                 | CYP1A2   |
| MOL000098 | quercetin | Caveolin-1                                          | CAV1     |
| MOL000098 | quercetin | Myc proto-oncogene protein                          | MYC      |
| MOL000098 | quercetin | Tissue factor                                       | F3       |
| MOL000098 | quercetin | Gap junction alpha-1 protein                        | GJA1     |
| MOL000098 | quercetin | Cytochrome P450 1A1                                 | CYP1A1   |
| MOL000098 | quercetin | Intercellular adhesion molecule 1                   | ICAM1    |
| MOL000098 | quercetin | Interleukin-1 beta                                  | IL1B     |
| MOL000098 | quercetin | C-C motif chemokine 2                               | CCL2     |
| MOL000098 | quercetin | E-selectin                                          | SELE     |
| MOL000098 | quercetin | Vascular cell adhesion protein 1                    | VCAM1    |
| MOL000098 | quercetin | Prostaglandin E2 receptor EP3 subtype               | PTGER3   |
| MOL000098 | quercetin | Interleukin-8                                       | CXCL8    |
| MOL000098 | quercetin | Protein kinase C beta type                          | PRKCB    |
| MOL000098 | quercetin | Baculoviral IAP repeat-containing protein 5         | BIRC5    |
| MOL000098 | quercetin | Dual oxidase 2                                      | DUOX2    |
| MOL000098 | quercetin | Nitric oxide synthase, endothelial                  | NOS3     |
| MOL000098 | quercetin | Heat shock protein beta-1                           | HSPB1    |
| MOL000098 | quercetin | Estrogen sulfotransferase                           | SULT1E1  |
| MOL000098 | quercetin | Maltase-glucoamylase, intestinal                    | MGAM     |
| MOL000098 | quercetin | Interleukin-2                                       | IL2      |
| MOL000098 | quercetin | Nuclear receptor subfamily 1 group I member 2       | NR1I2    |
| MOL000098 | quercetin | Cytochrome P450 1B1                                 | CYP1B1   |
| MOL000098 | quercetin | G2/mitotic-specific cyclin-B1                       | CCNB1    |
| MOL000098 | quercetin | Tissue-type plasminogen activator                   | PLAT     |
| MOL000098 | quercetin | Thrombomodulin                                      | THBD     |
| MOL000098 | quercetin | Plasminogen activator inhibitor 1                   | SERPINE1 |
| MOL000098 | quercetin | Collagen alpha-1(I) chain                           | COL1A1   |
| MOL000098 | quercetin | Interferon gamma                                    | IFNG     |
| MOL000098 | quercetin | Arachidonate 5-lipoxygenase                         | ALOX5    |
| MOL000098 | quercetin | Interleukin-1 alpha                                 | IL1A     |
| MOL000098 | quercetin | Myeloperoxidase                                     | MPO      |
| MOL000098 | quercetin | DNA topoisomerase 2-alpha                           | TOP2A    |
| MOL000098 | quercetin | Neutrophil cytosol factor 1                         | NCF1     |
| MOL000098 | quercetin | ATP-binding cassette sub-family G member 2          | ABCG2    |
| MOL000098 | quercetin | Hyaluronan synthase 2                               | HAS2     |
| MOL000098 | quercetin | Glutathione S-transferase P                         | GSTP1    |
| MOL000098 | quercetin | Nuclear factor erythroid 2-related factor 2         | NFE2L2   |
| MOL000098 | quercetin | NAD(P)H dehydrogenase [quinone] 1                   | NQO1     |
| MOL000098 | quercetin | Poly [ADP-ribose] polymerase 1                      | PARP1    |
| MOL000098 | quercetin | Aryl hydrocarbon receptor                           | AHR      |
| MOL000098 | quercetin | 26S proteasome non-ATPase regulatory subunit 3      | PSMD3    |
| MOL000098 | quercetin | Solute carrier family 2, facilitated glucose transp | SLC2A4   |
| MOL000098 | quercetin | Collagen alpha-1(III) chain                         | COL3A1   |
| MOL000098 | quercetin | C-X-C motif chemokine 11                            | CXCL11   |
| MOL000098 | quercetin | C-X-C motif chemokine 2                             | CXCL2    |
| MOL000098 | quercetin | DDB1- and CUL4-associated factor 5                  | DCAF5    |
| MOL000098 | quercetin | Nuclear receptor subfamily 1 group I member 3       | NR1I3    |

|           |                                    |                                                     |          |
|-----------|------------------------------------|-----------------------------------------------------|----------|
| MOL000098 | quercetin                          | Serine/threonine-protein kinase Chk2                | CHEK2    |
| MOL000098 | quercetin                          | Insulin receptor                                    | INSR     |
| MOL000098 | quercetin                          | Claudin-4                                           | CLDN4    |
| MOL000098 | quercetin                          | Peroxisome proliferator-activated receptor alpha    | PPARA    |
| MOL000098 | quercetin                          | Peroxisome proliferator-activated receptor delta    | PPARD    |
| MOL000098 | quercetin                          | Heat shock factor protein 1                         | HSF1     |
| MOL000098 | quercetin                          | C-reactive protein                                  | CRP      |
| MOL000098 | quercetin                          | C-X-C motif chemokine 10                            | CXCL10   |
| MOL000098 | quercetin                          | Inhibitor of nuclear factor kappa-B kinase subunit  | CHUK     |
| MOL000098 | quercetin                          | Osteopontin                                         | SPP1     |
| MOL000098 | quercetin                          | Runt-related transcription factor 2                 | RUNX2    |
| MOL000098 | quercetin                          | Ras association domain-containing protein 1         | RASSF1   |
| MOL000098 | quercetin                          | Transcription factor E2F1                           | E2F1     |
| MOL000098 | quercetin                          | Transcription factor E2F2                           | E2F2     |
| MOL000098 | quercetin                          | Prostatic acid phosphatase                          | ACPP     |
| MOL000098 | quercetin                          | Cathepsin D                                         | CTSD     |
| MOL000098 | quercetin                          | Insulin-like growth factor-binding protein 3        | IGFBP3   |
| MOL000098 | quercetin                          | Insulin-like growth factor II                       | IGF2     |
| MOL000098 | quercetin                          | CD40 ligand                                         | CD40LG   |
| MOL000098 | quercetin                          | Interferon regulatory factor 1                      | IRF1     |
| MOL000098 | quercetin                          | Receptor tyrosine-protein kinase erbB-3             | ERBB3    |
| MOL000098 | quercetin                          | Serum paraoxonase/arylesterase 1                    | PON1     |
| MOL000098 | quercetin                          | Type I iodothyronine deiodinase                     | DIO1     |
| MOL000098 | quercetin                          | Procollagen C-endopeptidase enhancer 1              | PCOLCE   |
| MOL000098 | quercetin                          | Puromycin-sensitive aminopeptidase                  | NPEPPS   |
| MOL000098 | quercetin                          | Hexokinase-2                                        | HK2      |
| MOL000098 | quercetin                          | Ras GTPase-activating protein 1                     | RASA1    |
| MOL000098 | quercetin                          | Glutathione S-transferase Mu 1                      | GSTM1    |
| MOL000098 | quercetin                          | Glutathione S-transferase Mu 2                      | GSTM2    |
| MOL003128 | dinethylsecobarbital               | Androgen receptor                                   | AR       |
| MOL003095 | 5-hydroxy-7-iodo-2'-deoxyadenosine | Nitric oxide synthase, inducible                    | NOS2     |
| MOL003095 | 5-hydroxy-7-iodo-2'-deoxyadenosine | Prostaglandin G/H synthase 1                        | PTGS1    |
| MOL003095 | 5-hydroxy-7-iodo-2'-deoxyadenosine | Potassium voltage-gated channel subfamily H member  | KCNH2    |
| MOL003095 | 5-hydroxy-7-iodo-2'-deoxyadenosine | Estrogen receptor                                   | ESR1     |
| MOL003095 | 5-hydroxy-7-iodo-2'-deoxyadenosine | Androgen receptor                                   | AR       |
| MOL003095 | 5-hydroxy-7-iodo-2'-deoxyadenosine | Sodium channel protein type 5 subunit alpha         | SCN5A    |
| MOL003095 | 5-hydroxy-7-iodo-2'-deoxyadenosine | Peroxisome proliferator activated receptor gamma    | PPARG    |
| MOL003095 | 5-hydroxy-7-iodo-2'-deoxyadenosine | Prostaglandin G/H synthase 2                        | PTGS2    |
| MOL003095 | 5-hydroxy-7-iodo-2'-deoxyadenosine | Voltage-dependent calcium channel subunit alpha-2/c | CACNA2D1 |
| MOL003095 | 5-hydroxy-7-iodo-2'-deoxyadenosine | Estrogen receptor beta                              | ESR2     |
| MOL003095 | 5-hydroxy-7-iodo-2'-deoxyadenosine | Mitogen-activated protein kinase 14                 | MAPK14   |
| MOL003095 | 5-hydroxy-7-iodo-2'-deoxyadenosine | Glycogen synthase kinase-3 beta                     | GSK3B    |
| MOL003095 | 5-hydroxy-7-iodo-2'-deoxyadenosine | Serine/threonine-protein kinase Chk1                | CHEK1    |
| MOL003095 | 5-hydroxy-7-iodo-2'-deoxyadenosine | Trypsin-1                                           | PRSS1    |
| MOL003095 | 5-hydroxy-7-iodo-2'-deoxyadenosine | Nuclear receptor coactivator 2                      | NCOA2    |
| MOL003095 | 5-hydroxy-7-iodo-2'-deoxyadenosine | Nuclear receptor coactivator 1                      | NCOA1    |
| MOL003095 | 5-hydroxy-7-iodo-2'-deoxyadenosine | Beta-2 adrenergic receptor                          | ADRB2    |
| MOL003014 | secologanic acid                   | Estrogen receptor                                   | ESR1     |
| MOL003014 | secologanic acid                   | Prostaglandin G/H synthase 2                        | PTGS2    |
| MOL003111 | Centauroside                       | Estrogen receptor                                   | ESR1     |
| MOL003111 | Centauroside                       | Androgen receptor                                   | AR       |

|           |                                                                                 |        |
|-----------|---------------------------------------------------------------------------------|--------|
| MOL003111 | Centauroside_Trypsin-1                                                          | PRSS1  |
| MOL003111 | Centauroside_Nuclear receptor coactivator 2                                     | NCOA2  |
| MOL003111 | Centauroside_Nuclear receptor coactivator 1                                     | NCOA1  |
| MOL003117 | IoniceracetalNitric oxide synthase, inducible                                   | NOS2   |
| MOL003117 | IoniceracetalProstaglandin G/H synthase 2                                       | PTGS2  |
| MOL003117 | IoniceracetalGamma-aminobutyric acid receptor subunit alpha-1                   | GABRA1 |
| MOL003006 | (-)-(3R,8S,9I)Prostaglandin G/H synthase 2                                      | PTGS2  |
| MOL003006 | (-)-(3R,8S,9I)Gamma-aminobutyric acid receptor subunit alpha-1                  | GABRA1 |
| MOL000006 | luteolin Xanthine dehydrogenase/oxidase                                         | XDH    |
| MOL000422 | kaempferol Xanthine dehydrogenase/oxidase                                       | XDH    |
| MOL000098 | quercetin Xanthine dehydrogenase/oxidase                                        | XDH    |
| MOL000422 | kaempferol DNA topoisomerase II                                                 | TPO2A  |
| MOL000098 | quercetin DNA topoisomerase II                                                  | TPO2A  |
| MOL003095 | 5-hydroxy-7-riDNA topoisomerase II                                              | TPO2A  |
| MOL000358 | beta-sitosterolTransforming growth factor beta-1                                | TGFB1  |
| MOL000098 | quercetin Transforming growth factor beta-1                                     | TGFB1  |
| MOL003044 | Chryseriol Phosphatidylinositol-4,5-bisphosphate 3-kinase catalytic subunit     | PIK3CG |
| MOL000006 | luteolin Phosphatidylinositol-4,5-bisphosphate 3-kinase catalytic subunit       | PIK3CG |
| MOL000358 | beta-sitosterolPhosphatidylinositol-4,5-bisphosphate 3-kinase catalytic subunit | PIK3CG |
| MOL002914 | Eriodyctiol Phosphatidylinositol-4,5-bisphosphate 3-kinase catalytic subunit    | PIK3CG |
| MOL000422 | kaempferol Phosphatidylinositol-4,5-bisphosphate 3-kinase catalytic subunit     | PIK3CG |
| MOL000098 | quercetin Phosphatidylinositol-4,5-bisphosphate 3-kinase catalytic subunit      | PIK3CG |
| MOL000358 | beta-sitosterolcGMP-inhibited 3',5'-cyclic phosphodiesterase A                  | PDE3A  |
| MOL000449 | Stigmasterol Ig gamma-1 chain C region                                          | IGHG1  |
| MOL000358 | beta-sitosterol5-hydroxytryptamine 2A receptor                                  | HTR2A  |
| MOL000449 | Stigmasterol 5-hydroxytryptamine 2A receptor                                    | HTR2A  |
| MOL000098 | quercetin 78 kDa glucose-regulated protein                                      | HSPA5  |
| MOL000098 | quercetin DNA gyrase subunit B                                                  | gyrB   |
| MOL000358 | beta-sitosterolGamma-aminobutyric-acid receptor alpha-5 subunit                 | GABRA5 |
| MOL000358 | beta-sitosterolGamma-aminobutyric-acid receptor alpha-3 subunit                 | GABRA3 |
| MOL000449 | Stigmasterol Gamma-aminobutyric-acid receptor alpha-3 subunit                   | GABRA3 |
| MOL000358 | beta-sitosterolGamma-aminobutyric-acid receptor alpha-2 subunit                 | GABRA2 |
| MOL000422 | kaempferol Gamma-aminobutyric-acid receptor alpha-2 subunit                     | GABRA2 |
| MOL000098 | quercetin Coagulation factor Xa                                                 | F10    |
| MOL003095 | 5-hydroxy-7-riCoagulation factor Xa                                             | F10    |
| MOL000358 | beta-sitosterolDopamine D1 receptor                                             | DRD1   |
| MOL003044 | Chryseriol Dipeptidyl peptidase IV                                              | DPP4   |
| MOL000006 | luteolin Dipeptidyl peptidase IV                                                | DPP4   |
| MOL000422 | kaempferol Dipeptidyl peptidase IV                                              | DPP4   |
| MOL000098 | quercetin Dipeptidyl peptidase IV                                               | DPP4   |
| MOL003095 | 5-hydroxy-7-riDipeptidyl peptidase IV                                           | DPP4   |
| MOL003111 | Centauroside_Dipeptidyl peptidase IV                                            | DPP4   |
| MOL003117 | IoniceracetalDipeptidyl peptidase IV                                            | DPP4   |
| MOL003006 | (-)-(3R,8S,9I)Dipeptidyl peptidase IV                                           | DPP4   |
| MOL000006 | luteolin Cell division protein kinase 4                                         | CDK4   |
| MOL003044 | Chryseriol Cell division protein kinase 2                                       | CDK2   |
| MOL000422 | kaempferol Cell division control protein 2 homolog                              | CDK1   |
| MOL000098 | quercetin Cell division control protein 2 homolog                               | CDK1   |
| MOL003044 | Chryseriol Calmodulin                                                           | CAMKK2 |
| MOL002914 | Eriodyctiol Calmodulin                                                          | CAMKK2 |
| MOL000422 | kaempferol Calmodulin                                                           | CAMKK2 |



|           |                       |                       |        |
|-----------|-----------------------|-----------------------|--------|
| MOL003095 | 5-hydroxy-7- $\gamma$ | Calmodulin            | CAMKK2 |
| MOL003128 | dinethylseco          | Carbonic anhydrase II | CA2    |
| MOL003111 | Centauroside          | Carbonic anhydrase II | CA2    |
| MOL003006 | (-)-(3R, 8S, 9I       | Carbonic anhydrase II | CA2    |
| MOL003095 | 5-hydroxy-7- $\gamma$ | Beta-secretase        | BACE1  |
